# Supplementary material for: CSF Levels of Elongation Factor Tu Is Associated With Increased Mortality in Malawian Adults With Streptococcus pneumoniae Meningitis
Source: Front Cell Infect Microbiol. 2020 Dec 11;10:603623. doi: 10.3389/fcimb.2020.603623 (PMC7759504; doi:10.3389/fcimb.2020.603623)
Supplement: Supplementary file 3 [file DataSheet_1.xlsx]

## Sheet: Data
Accession	gene code ensembl	gene name	Peptide count	Unique peptides	Confidence score	Anova (p)	q Value	Max fold change	Power	AP_Anova (p)	AP_q Value	AP_Max fold change	AP_Power	Highest mean condition	Lowest mean condition	Description	normal CSF ?	Quartile	median normalised abundance	Top3_Normalized abundance
P01613	#N/A	#N/A	3	0	157.09									---	---	Ig kappa chain V-I region Ni OS=Homo sapiens PE=1 SV=1	0	Ttest	#REF!
P02768	ENSG00000163631	ALB	63	63	6524.67	0.539008	0.633223	1.11454	0.0954583	0.413158	0.51139	1.1174	0.131998	Outcome 0	Outcome 1	Serum albumin OS=Homo sapiens GN=ALB PE=1 SV=2	1	4	2.01588e+09	1.72087e+09	2.72674e+09	2.16095e+09	2.11775e+09	8.22603e+08	1.22834e+09	1.43231e+09	2.67716e+09	1.90319e+09	2.12871e+09	2.2925e+09	2.23624e+09	1.23321e+09	1.31983e+09	1.56525e+09	2.40004e+09	5.61123e+09	2.77723e+09	6.12039e+09	1.24381e+09	1.92776e+09	1.78486e+09	5.04723e+08	3.02883e+09	1.50955e+09	2.14892e+09	1.03302e+09	1.56316e+09	2.01685e+09	8.00595e+08
P01857	ENSG00000277633	IGHG1	16	6	1526.97	0.418947	0.591283	1.18897	0.129921	0.384698	0.505501	1.20241	0.142902	Outcome 1	Outcome 0	Ig gamma-1 chain C region OS=Homo sapiens GN=IGHG1 PE=1 SV=1	1	4	1.38956e+09	1.06788e+09	1.40797e+09	8.23931e+08	2.01815e+09	5.81646e+08	1.74103e+09	1.20257e+09	8.94513e+08	1.26436e+09	1.69765e+09	5.47889e+08	6.72707e+08	8.04088e+08	1.16928e+09	2.38674e+09	2.50127e+09	8.8742e+08	2.75857e+09	1.37115e+09	3.29519e+09	1.33126e+09	1.51596e+09	8.99588e+08	5.59022e+08	2.49291e+09	1.31745e+09	1.62186e+09	2.35933e+09	1.67839e+09	4.12672e+09
P01834	ENSG00000211592	IGKC	7	7	651.57	0.792725	0.709921	1.13469	0.0581403	0.755853	0.597545	1.14655	0.0614217	Outcome 1	Outcome 0	Ig kappa chain C region OS=Homo sapiens GN=IGKC PE=1 SV=1	1	4	6.02164e+08	4.8746e+08	5.58659e+08	4.51801e+08	8.01466e+08	2.55001e+08	6.42162e+08	5.24689e+08	3.18485e+08	4.0528e+08	6.06052e+08	4.23274e+08	3.03885e+08	3.86791e+08	2.91511e+08	5.98275e+08	1.25594e+09	7.05388e+08	1.2212e+09	7.28091e+08	1.3327e+09	6.6655e+08	7.5208e+08	4.96157e+08	4.45117e+08	1.3661e+09	5.13236e+08	5.89513e+08	1.07081e+09	5.45253e+08	1.48617e+09
B9A064;P0CG04	ENSG00000254709	IGLL5	8	3	624.34	0.212757	0.493988	1.44187	0.245734	0.111205	0.298645	2.46998	0.371343	Outcome 1	Outcome 0	Immunoglobulin lambda-like polypeptide 5 OS=Homo sapiens GN=IGLL5 PE=2 SV=2	0	4	2.9055e+08	2.29294e+08	3.50537e+08	3.04571e+08	2.74893e+08	1.35637e+08	2.76783e+08	2.80976e+08	3.05166e+08	3.21272e+08	3.10196e+08	2.92899e+08	2.95233e+08	2.1366e+08	1.74873e+08	4.37083e+08	4.54736e+08	4.1622e+08	2.70724e+08	2.80447e+08	2.56429e+08	1.89964e+08	3.12086e+08	2.18216e+08	2.52151e+08	4.91643e+08	3.92097e+08	3.58078e+08	3.47922e+08	3.43364e+08	3.62753e+08
P02763	ENSG00000229314	ORM1	11	8	980.14	0.139387	0.407284	1.20585	0.327045	0.0610729	0.269408	1.25275	0.486993	Outcome 1	Outcome 0	Alpha-1-acid glycoprotein 1 OS=Homo sapiens GN=ORM1 PE=1 SV=1	1	4	1.32761e+08	9.53768e+07	4.62112e+07	2.23774e+08	9.04353e+07	1.48588e+08	7.18694e+07	1.33646e+08	1.05472e+08	4.85875e+07	7.1424e+07	1.49096e+08	1.20559e+08	2.83931e+08	7.92585e+07	1.04101e+08	1.65987e+08	1.31875e+08	1.36412e+08	1.23429e+08	1.29532e+08	1.72052e+08	1.8667e+08	7.61707e+07	2.95247e+08	1.41459e+08	1.58498e+08	2.99954e+08	1.809e+08	1.37987e+08	4.96295e+07
P0CG05;P0CG06;P0CF74	ENSG00000211677	IGLC2	7	1	584.44	0.148663	0.412091	1.29336	0.314462	0.381107	0.505501	1.29064	0.144365	Outcome 1	Outcome 0	Ig lambda-2 chain C regions OS=Homo sapiens GN=IGLC2 PE=1 SV=1	0	4	1.25378e+08	9.30341e+07	1.36239e+08	1.16397e+08	1.32169e+08	5.54111e+07	1.13116e+08	9.21549e+07	8.46298e+07	1.07515e+08	1.15289e+08	8.27327e+07	9.94628e+07	1.07762e+08	5.69896e+07	1.94789e+08	2.00327e+08	1.27653e+08	1.33398e+08	1.33221e+08	1.08179e+08	7.46676e+07	1.27684e+08	6.1148e+07	6.41818e+07	2.01274e+08	1.58252e+08	2.02737e+08	1.28761e+08	1.82513e+08	1.98106e+08
P00738	ENSG00000257017	HP	27	14	2396.79	0.0347645	0.344342	1.41592	0.587999	0.0223593	0.224217	1.44453	0.659149	Outcome 1	Outcome 0	Haptoglobin OS=Homo sapiens GN=HP PE=1 SV=1	1	4	1.08882e+08	7.29132e+07	2.79481e+07	3.03108e+08	1.11383e+08	1.08696e+08	5.57844e+07	1.07202e+08	6.47595e+07	6.21708e+07	9.01484e+07	1.0883e+08	1.07193e+08	1.39267e+08	1.99169e+07	3.75107e+07	1.29161e+08	4.84145e+07	1.94077e+08	1.98961e+08	6.25913e+07	8.86632e+07	5.21704e+07	5.99757e+07	6.25182e+07	5.16558e+07	5.42189e+07	6.42782e+07	1.99337e+08	1.14759e+08	4.83828e+07
P01009	ENSG00000197249	SERPINA1	27	26	1978.61	0.060047	0.344342	1.85444	0.490166	0.0215675	0.224217	1.92482	0.664611	Outcome 1	Outcome 0	Alpha-1-antitrypsin OS=Homo sapiens GN=SERPINA1 PE=1 SV=3	1	4	9.06233e+07	1.13051e+08	9.07157e+07	1.30544e+08	1.33327e+08	1.35077e+08	6.41993e+07	1.67409e+07	1.31859e+07	8.80309e+07	1.8136e+07	6.28002e+06	6.46458e+06	4.05248e+08	7.3409e+06	1.30089e+08	1.08479e+07	1.11445e+07	9.05308e+07	8.20521e+07	1.58441e+07	1.16341e+08	1.9777e+08	2.84419e+07	1.14185e+07	1.70488e+08	1.72163e+08	2.01851e+08	2.05549e+08	2.25348e+08	6.08181e+07
P01876;P01877	ENSG00000282633	IGHA1	14	14	1285.01	0.53155	0.633223	1.33477	0.0971915	0.617265	0.565655	1.25505	0.0798316	Outcome 1	Outcome 0	Ig alpha-1 chain C region OS=Homo sapiens GN=IGHA1 PE=1 SV=2	0	4	9.04181e+07	1.72888e+08	7.29862e+07	5.04933e+07	9.04603e+07	9.20344e+07	1.10754e+08	4.94958e+07	4.75874e+07	6.58581e+07	6.2087e+07	6.47409e+07	6.54537e+07	5.43382e+07	1.73114e+07	1.45369e+08	5.11503e+07	1.20103e+08	4.77111e+07	1.6444e+08	6.00352e+07	1.57723e+08	1.03833e+08	2.06349e+08	1.0198e+08	1.39773e+08	1.52306e+08	2.80927e+08	1.0607e+08	7.67484e+07	3.2976e+07
P02787	ENSG00000091513	TF	45	45	4160.03	0.197646	0.470977	1.15689	0.259612	0.150102	0.355138	1.16223	0.312584	Outcome 0	Outcome 1	Serotransferrin OS=Homo sapiens GN=TF PE=1 SV=3	1	4	8.65411e+07	6.76565e+07	1.10694e+08	6.74683e+07	9.38956e+07	4.02e+07	6.68784e+07	7.87411e+07	1.39964e+08	7.94788e+07	1.19887e+08	9.99512e+07	1.63097e+08	1.01702e+08	6.17693e+07	1.81253e+08	7.69275e+07	1.22335e+08	7.89104e+07	2.33575e+08	5.81343e+07	9.11226e+07	6.22055e+07	2.94046e+07	1.05472e+08	3.27093e+07	1.14817e+08	3.42355e+07	6.77663e+07	9.71707e+07	4.32948e+07
P01860	ENSG00000211897	IGHG3	18	8	1619.54	0.4162	0.591283	1.25589	0.130901	0.28736	0.445827	1.28751	0.191218	Outcome 1	Outcome 0	Ig gamma-3 chain C region OS=Homo sapiens GN=IGHG3 PE=1 SV=2	1	4	6.66818e+07	5.30334e+07	6.23573e+07	8.31162e+07	9.08085e+07	2.7457e+07	8.1136e+07	5.51182e+07	4.7528e+07	6.56512e+07	1.23999e+08	1.8311e+07	5.48462e+07	1.17105e+08	1.57339e+08	6.77124e+07	1.14869e+08	5.61428e+07	6.24504e+07	1.40934e+08	3.98863e+07	6.03933e+07	5.95633e+07	4.60938e+07	3.33701e+07	1.83727e+08	4.18958e+07	6.46041e+07	1.13495e+08	1.04411e+08	6.27336e+07
P01859	ENSG00000274497	IGHG2	15	5	1040.17	0.917762	0.752513	1.00149	0.051251	0.966619	0.656717	1.00257	0.0502053	Outcome 0	Outcome 1	Ig gamma-2 chain C region OS=Homo sapiens GN=IGHG2 PE=1 SV=2	1	4	6.3859e+07	5.68938e+07	3.24451e+07	8.47746e+07	6.13072e+07	2.25517e+07	2.50704e+07	2.30554e+07	7.57225e+07	6.70405e+07	2.81608e+07	1.52097e+08	7.29086e+07	1.61165e+08	5.06159e+07	6.26012e+07	1.04388e+08	7.25027e+07	2.205e+07	1.42586e+08	2.40224e+07	1.03378e+08	6.51168e+07	6.00887e+07	7.59707e+07	1.43565e+08	5.22718e+07	6.13202e+07	2.53951e+07	4.16568e+07	7.70756e+07
P02790	ENSG00000110169	HPX	16	15	1381.36	0.878851	0.745835	1.09254	0.0527291	0.660655	0.569283	1.1123	0.072931	Outcome 1	Outcome 0	Hemopexin OS=Homo sapiens GN=HPX PE=1 SV=2	1	4	4.85805e+07	4.43076e+07	4.30044e+07	7.99823e+07	4.18662e+07	5.20376e+07	3.13435e+07	2.26722e+07	4.78167e+07	3.62236e+07	3.26382e+07	2.31588e+07	5.09255e+07	9.96325e+07	1.62014e+07	8.03809e+07	4.20941e+07	4.16595e+07	4.68e+07	8.29835e+07	5.16653e+07	5.20658e+07	5.6002e+07	2.17011e+07	8.20617e+06	4.93444e+07	6.34808e+07	4.5863e+07	3.66407e+07	6.31687e+07	2.80164e+07
P02647	ENSG00000118137	APOA1	22	22	1561.65	0.0380534	0.344342	1.44402	0.5725	0.0787143	0.275185	1.34592	0.438692	Outcome 0	Outcome 1	Apolipoprotein A-I OS=Homo sapiens GN=APOA1 PE=1 SV=1	1	4	3.23826e+07	4.50873e+07	3.42745e+07	2.79378e+07	6.70541e+07	1.13071e+07	3.16133e+07	3.52924e+07	2.60577e+07	6.08424e+07	4.42055e+07	4.2535e+07	4.44412e+07	2.06146e+07	2.7814e+07	4.85126e+07	3.16299e+07	1.94173e+08	7.11593e+07	9.1146e+07	4.0607e+07	8.0568e+07	3.75058e+07	4.79736e+07	9.54279e+06	3.98917e+07	2.77053e+07	1.45876e+07	2.03335e+07	7.25253e+07	2.62897e+07
P02679	ENSG00000171557	FGG	26	26	1869.58	0.764675	0.697073	1.45239	0.0605808	0.845821	0.61719	1.3761	0.0544467	Outcome 0	Outcome 1	Fibrinogen gamma chain OS=Homo sapiens GN=FGG PE=1 SV=3	1	4	2.63256e+07	2.45953e+07	6.33398e+06	6.79004e+07	7.32361e+06	2.43797e+08	6.70192e+06	1.63214e+07	8.21095e+07	6.03428e+06	1.16142e+07	1.72373e+07	1.70315e+07	3.81041e+07	2.14057e+06	1.27851e+08	1.3625e+07	9.5309e+06	3.33495e+07	1.4394e+08	1.02315e+08	2.0748e+06	1.54589e+07	2.81738e+07	3.16845e+07	1.76977e+07	5.74258e+06	1.93126e+07	3.0576e+07	3.47126e+07	4.06203e+07
P06702	ENSG00000163220	S100A9	11	11	1014.82	0.104937	0.364275	1.19421	0.38272	0.0978237	0.296395	1.16781	0.396461	Outcome 1	Outcome 0	Protein S100-A9 OS=Homo sapiens GN=S100A9 PE=1 SV=1	0	4	2.51067e+07	1.22879e+07	1.20481e+07	5.86438e+07	6.88983e+06	3.21199e+08	7.3774e+07	1.97229e+08	1.01474e+08	8.2851e+06	2.51074e+07	1.19755e+08	1.08737e+08	7.48968e+06	7.89282e+07	5.50264e+07	5.57946e+07	1.41428e+08	7.2467e+07	2.51059e+07	2.43393e+08	4.74559e+07	1.89604e+07	1.99706e+07	8.20016e+08	7.23534e+06	7.58029e+06	6.61331e+07	1.81644e+07	9.37617e+06	2.36439e+07
P01023	ENSG00000175899	A2M	56	49	4154.54	0.885271	0.746858	1.02323	0.0524451	0.941416	0.646655	1.04072	0.0506334	Outcome 0	Outcome 1	Alpha-2-macroglobulin OS=Homo sapiens GN=A2M PE=1 SV=3	1	4	2.49071e+07	3.37666e+07	7.89797e+06	1.89301e+07	2.28096e+07	1.51859e+07	2.35583e+07	1.67968e+07	3.17768e+07	2.26346e+07	3.36974e+07	1.90656e+07	5.12241e+07	2.19231e+07	1.49565e+07	2.64985e+07	3.73696e+07	4.64273e+07	3.21763e+07	6.62248e+07	9.9045e+06	4.7676e+07	1.65327e+07	1.34373e+07	2.44477e+07	3.14428e+07	3.04396e+07	1.79488e+07	2.44577e+07	3.18687e+07	2.01891e+07
P01766	ENSG00000211942	IGHV3-13	1	1	81.61	0.108617	0.364275	1.37127	0.375963	0.108617	0.298645	1.37127	0.375963	Outcome 1	Outcome 0	Ig heavy chain V-III region BRO OS=Homo sapiens PE=1 SV=1	1	4	2.46182e+07	2.15678e+07	2.08198e+07	1.07218e+07	1.67297e+07	1.76168e+07	2.57017e+07	3.83101e+07	2.00997e+07	2.2233e+07	2.03713e+07	2.07585e+07	2.40369e+07	3.05424e+07	1.29966e+07	4.18442e+07	1.87956e+07	1.96681e+07	1.72721e+07	3.32288e+07	2.50841e+07	1.72201e+07	5.70883e+07	1.13992e+07	4.51156e+07	6.9963e+07	3.13031e+07	3.44295e+07	2.41523e+07	2.33529e+07	3.96898e+07
P59665	ENSG00000240247	DEFA1B	5	5	243.13	0.00636178	0.172821	2.39391	0.81656	0.00853421	0.172191	2.31398	0.785817	Outcome 0	Outcome 1	Neutrophil defensin 1 OS=Homo sapiens GN=DEFA1 PE=1 SV=1	0	4	2.25331e+07	5.86735e+06	6.97901e+06	4.25637e+07	3.25864e+06	5.28779e+07	2.38569e+07	1.0952e+08	1.71951e+08	1.00835e+07	2.27737e+07	5.86647e+07	8.98565e+07	4.15822e+06	4.03227e+07	5.20652e+07	6.369e+07	2.28979e+08	6.81823e+07	4.21069e+07	7.37372e+07	3.99183e+07	1.95632e+06	3.70918e+07	5.5099e+07	4.36684e+06	1.07302e+06	3.02855e+07	6.75241e+06	1.05755e+07	1.48353e+07
P19652	ENSG00000228278	ORM2	8	5	528.17	0.0934727	0.364275	1.19219	0.405347	0.0641485	0.269408	1.20709	0.477749	Outcome 1	Outcome 0	Alpha-1-acid glycoprotein 2 OS=Homo sapiens GN=ORM2 PE=1 SV=2	1	4	2.11447e+07	2.11275e+07	9.57977e+06	1.67593e+07	1.96123e+07	2.98253e+07	1.36755e+07	1.5254e+07	1.21813e+07	1.26561e+07	9.7887e+06	1.98721e+07	1.80924e+07	6.22999e+07	1.58168e+07	2.55995e+07	2.08999e+07	2.14956e+07	2.11619e+07	2.72535e+07	1.87598e+07	2.41128e+07	3.80463e+07	1.96708e+07	3.60685e+07	2.45136e+07	1.29216e+07	2.62893e+07	3.08452e+07	1.69998e+07	9.7956e+06
P01024	ENSG00000125730	C3	84	84	6304.26	0.508941	0.617216	1.02628	0.102738	0.755442	0.597545	1.00409	0.0614617	Outcome 0	Outcome 1	Complement C3 OS=Homo sapiens GN=C3 PE=1 SV=2	1	4	2.10213e+07	1.47366e+07	8.6631e+06	2.49226e+07	1.61075e+07	1.26621e+07	1.68448e+07	2.44159e+07	2.80674e+07	1.59929e+07	2.14846e+07	1.92338e+07	2.32857e+07	3.09233e+07	1.91533e+07	2.05537e+07	1.77306e+07	2.2058e+07	3.54991e+07	4.16567e+07	2.62669e+07	3.85944e+07	9.00538e+06	9.31058e+06	1.12289e+07	8.30609e+06	1.99919e+07	1.2131e+07	7.76586e+06	3.14824e+07	7.87143e+06
P02774	ENSG00000145321	GC	21	21	1561.95	0.685014	0.67423	1.04173	0.069537	0.590409	0.565655	1.0489	0.0847005	Outcome 1	Outcome 0	Vitamin D-binding protein OS=Homo sapiens GN=GC PE=1 SV=1	1	4	2.08754e+07	2.479e+07	2.24285e+07	2.12616e+07	1.92781e+07	1.24713e+07	1.5992e+07	1.55286e+07	2.82203e+07	1.99688e+07	1.64022e+07	9.84885e+06	1.88372e+07	3.02327e+07	8.14707e+06	3.99792e+07	1.64068e+07	3.30308e+07	3.06841e+07	2.70058e+07	1.59696e+07	2.43437e+07	2.15085e+07	1.31915e+07	2.22017e+07	1.98498e+07	1.93497e+07	2.18831e+07	1.70618e+07	4.18406e+07	8.28396e+06
P05109	ENSG00000143546	S100A8	10	10	604.59	0.0442489	0.344342	1.19985	0.545997	0.0489164	0.269408	1.20371	0.527962	Outcome 1	Outcome 0	Protein S100-A8 OS=Homo sapiens GN=S100A8 PE=1 SV=1	0	4	1.91114e+07	9.27482e+06	2.31192e+07	3.44898e+07	3.52348e+06	1.92669e+08	3.58106e+07	1.44937e+08	6.9076e+07	5.74143e+06	1.5335e+07	9.28639e+07	7.67578e+07	8.02319e+06	1.10385e+08	3.88204e+07	3.64769e+07	1.2159e+08	4.39511e+07	1.38217e+07	1.83679e+08	3.50285e+07	8.06129e+06	1.22197e+07	5.95795e+08	9.11461e+06	1.0646e+07	4.19889e+07	6.0801e+06	7.05085e+06	7.96422e+06
P04220	ENSG00000282657	IGHM	15	1	1006.47	0.723436	0.682318	1.07808	0.0648261	0.716605	0.582818	1.14562	0.0656084	Outcome 1	Outcome 0	Ig mu heavy chain disease protein OS=Homo sapiens PE=1 SV=1	0	4	1.88181e+07	8.96946e+06	4.98558e+06	2.42005e+07	1.57311e+07	8.36009e+06	2.13899e+07	8.30015e+06	7.36699e+06	1.31232e+07	2.15098e+07	1.57917e+07	4.40918e+07	5.39641e+07	2.69277e+07	3.94928e+07	3.97964e+07	6.04575e+06	4.32597e+07	5.55741e+07	6.44867e+06	3.53014e+07	3.10095e+07	1.58457e+07	1.86933e+07	5.31796e+07	1.33479e+07	4.35564e+07	3.87787e+07	1.88217e+07	1.88145e+07
P01871	ENSG00000282657	IGHM	21	7	1515.7	0.899867	0.749586	1.05443	0.0518587	0.758092	0.597545	1.06426	0.0612049	Outcome 1	Outcome 0	Ig mu chain C region OS=Homo sapiens GN=IGHM PE=1 SV=3	1	4	1.76349e+07	8.46419e+06	8.17924e+06	3.4365e+07	1.43153e+07	7.88127e+06	1.67395e+07	1.19666e+07	9.14422e+06	1.24692e+07	2.09581e+07	1.73022e+07	4.46918e+07	4.5885e+07	1.71559e+07	3.77221e+07	5.05449e+07	8.91488e+06	5.64596e+07	5.01158e+07	6.25125e+06	3.1992e+07	3.6521e+07	1.3254e+07	2.27181e+07	5.54e+07	1.18702e+07	4.0612e+07	3.95632e+07	1.8234e+07	1.81549e+07
P01861	ENSG00000277016	IGHG4	11	3	837.51	0.360715	0.572485	1.61504	0.153074	0.478168	0.528124	1.77233	0.11105	Outcome 1	Outcome 0	Ig gamma-4 chain C region OS=Homo sapiens GN=IGHG4 PE=1 SV=1	1	4	1.67239e+07	2.34461e+07	1.72639e+07	2.94081e+07	8.37699e+06	4.39209e+07	6.10353e+06	2.89073e+06	2.91889e+07	1.44329e+07	1.83982e+06	6.06935e+07	2.17675e+07	1.36711e+07	7.36939e+06	7.01583e+06	1.16515e+07	2.21038e+07	2.97573e+06	2.77192e+07	9.55743e+06	1.32302e+07	6.95108e+06	7.50465e+06	8.97361e+06	2.42839e+07	3.6733e+07	1.63595e+07	3.25439e+07	1.04883e+07	8.73351e+07
P02675	ENSG00000171564	FGB	26	26	2224.91	0.932373	0.752513	1.32397	0.0508447	0.921511	0.64355	1.32008	0.0511391	Outcome 0	Outcome 1	Fibrinogen beta chain OS=Homo sapiens GN=FGB PE=1 SV=2	1	4	1.60645e+07	1.60169e+07	6.66178e+06	4.00883e+07	4.74382e+06	1.21716e+08	4.02503e+06	1.31694e+07	4.24235e+07	3.5984e+06	9.26532e+06	9.86915e+06	1.03673e+07	2.09875e+07	4.19255e+06	7.29888e+07	1.65367e+07	9.36428e+06	2.5611e+07	6.58443e+07	5.97916e+07	729501	9.55312e+06	2.09396e+07	2.08148e+07	8.72195e+06	3.19933e+06	6.78696e+06	1.61179e+07	1.86954e+07	1.52871e+07
P00450	ENSG00000047457	CP	31	31	2257.19	0.610213	0.654426	1.12478	0.0810638	0.592229	0.565655	1.06983	0.0843552	Outcome 1	Outcome 0	Ceruloplasmin OS=Homo sapiens GN=CP PE=1 SV=1	1	4	1.56011e+07	1.35291e+07	7.04473e+06	2.10223e+07	1.23621e+07	8.10446e+06	7.04026e+06	1.648e+07	1.89169e+07	5.68507e+06	1.36512e+07	1.91716e+07	2.38132e+07	1.45495e+07	1.37015e+07	2.14184e+07	1.84981e+07	4.07403e+07	2.12305e+07	1.82534e+07	5.6565e+06	1.78291e+07	1.31931e+07	6.41438e+06	1.5742e+07	7.32692e+06	1.80949e+07	9.63769e+06	1.03977e+07	2.23789e+07	1.04402e+07
P01617;P01614	ENSG00000242534	IGKV2D-28	2	2	145.2	0.624537	0.654426	1.12881	0.0785947	0.624537	0.565655	1.12881	0.0785947	Outcome 1	Outcome 0	Ig kappa chain V-II region TEW OS=Homo sapiens PE=1 SV=1	0	4	1.52136e+07	1.32144e+07	1.32212e+07	9.92374e+06	1.93185e+07	5.47224e+06	1.27065e+07	1.06038e+07	9.41447e+06	1.45124e+07	1.07822e+07	1.50568e+07	1.65659e+07	9.4306e+06	6.97347e+06	9.98753e+06	1.54747e+07	2.41671e+07	3.10992e+07	2.57266e+07	1.53703e+07	2.76684e+07	2.80985e+07	9.63234e+06	1.67272e+07	3.63537e+07	1.32055e+07	1.41086e+07	1.85478e+07	1.55315e+07	1.5152e+06
P01011	ENSG00000196136	SERPINA3	25	25	1702.18	0.0468429	0.344342	1.88505	0.53579	0.0103067	0.17244	2.17426	0.764158	Outcome 1	Outcome 0	Alpha-1-antichymotrypsin OS=Homo sapiens GN=SERPINA3 PE=1 SV=2	1	4	1.47719e+07	2.1143e+07	7.30387e+07	7.07034e+06	3.11203e+07	2.38323e+07	8.65384e+06	6.93703e+06	2.25352e+06	1.07239e+07	3.37299e+06	1.21159e+06	2.98052e+06	8.64982e+07	3.87175e+06	1.78094e+07	3.89683e+06	2.72198e+06	4.49927e+06	5.2184e+06	3.98415e+06	1.47636e+07	3.2111e+07	2.02381e+07	2.49309e+06	3.79859e+07	4.29424e+07	4.84228e+07	4.26689e+07	5.42134e+07	1.47801e+07
P0DJI8	ENSG00000173432	SAA1	8	3	527.7	0.929445	0.752513	1.37194	0.0509197	0.868013	0.627518	1.37952	0.0532451	Outcome 1	Outcome 0	Serum amyloid A-1 protein OS=Homo sapiens GN=SAA1 PE=1 SV=1	1	4	1.16479e+07	1.11825e+06	1.40449e+06	2.31289e+07	1.30122e+07	2.83698e+06	2.3657e+07	4.38878e+06	1.67239e+07	3.69477e+06	2.89802e+07	1.09413e+07	1.78158e+07	4.01402e+07	595521	5.32013e+07	1.50008e+07	3.60785e+06	1.34371e+07	2.91817e+07	1.31174e+07	2.89013e+07	1.36669e+06	2.42424e+06	1.8748e+06	839405	6.17711e+06	2.97127e+06	8.23117e+06	613143	5.69359e+06
P61626	ENSG00000090382	LYZ	4	3	322.39	0.0469594	0.344342	1.56166	0.535342	0.0469594	0.269408	1.56166	0.535342	Outcome 0	Outcome 1	Lysozyme C OS=Homo sapiens GN=LYZ PE=1 SV=1	1	4	1.06142e+07	3.76127e+06	2.52227e+06	1.43792e+07	1.06348e+07	1.55362e+07	8.80555e+06	2.47952e+07	3.2222e+07	8.21836e+06	7.94605e+06	3.03597e+07	2.23835e+07	6.16333e+06	9.69516e+06	3.09341e+07	1.19361e+07	4.50788e+07	2.24835e+07	5.23051e+07	3.78722e+07	1.10329e+07	4.19041e+06	5.07369e+06	2.96481e+07	4.51061e+06	2.0228e+06	7.71831e+06	4.18528e+06	6.71831e+06	8.38758e+06
P80188	ENSG00000148346	LCN2	8	8	433.2	0.49465	0.606267	1.04743	0.106484	0.637544	0.565655	1.06549	0.0764646	Outcome 1	Outcome 0	Neutrophil gelatinase-associated lipocalin OS=Homo sapiens GN=LCN2 PE=1 SV=2	1	4	1.02237e+07	1.1768e+06	3.65658e+06	1.83646e+07	1.22756e+07	1.01945e+07	5.18985e+06	2.42571e+07	1.82212e+07	5.71951e+06	1.12596e+07	1.66749e+07	9.11838e+06	6.1316e+06	1.19211e+07	1.15022e+07	1.13173e+07	1.65184e+07	1.30555e+07	3.81601e+07	1.42945e+07	5.1156e+06	753179	1.34337e+06	2.27517e+07	4.29284e+06	946950	8.46533e+06	9.10674e+06	2.31823e+06	8.56195e+06
P02652	ENSG00000158874	APOA2	6	6	392.83	0.568027	0.637633	1.13595	0.0891404	0.627491	0.565655	1.11164	0.0781017	Outcome 0	Outcome 1	Apolipoprotein A-II OS=Homo sapiens GN=APOA2 PE=1 SV=1	1	4	8.8965e+06	1.73175e+07	1.31308e+07	5.41381e+06	3.30063e+07	8.54911e+06	1.35197e+07	2.53383e+06	8.71168e+06	2.02312e+07	3.68776e+06	3.61436e+06	7.88628e+06	3.64426e+06	3.96052e+06	1.24757e+07	2.04173e+06	1.27593e+07	2.03114e+07	1.30146e+07	1.87907e+07	2.65047e+07	1.22876e+07	1.14445e+07	3.6649e+06	1.32842e+07	1.52755e+07	3.42267e+06	8.55994e+06	2.38888e+07	8.12336e+06
P02671	ENSG00000171560	FGA	25	25	1603.98	0.780778	0.704658	1.20789	0.059137	0.25202	0.42597	1.02027	0.214543	Outcome 0	Outcome 1	Fibrinogen alpha chain OS=Homo sapiens GN=FGA PE=1 SV=2	1	4	8.78982e+06	6.38896e+06	3.24592e+06	2.33079e+07	3.24151e+06	6.02226e+07	2.17714e+06	7.8352e+06	3.13027e+07	2.5279e+06	5.21244e+06	7.63304e+06	6.67926e+06	1.51505e+07	1.06497e+06	5.54769e+07	7.99929e+06	5.47592e+06	1.03817e+07	5.62267e+07	3.05821e+07	1.18859e+06	4.20402e+06	6.51897e+06	1.35403e+07	8.40418e+06	1.25308e+06	5.06516e+06	1.19207e+07	1.05664e+07	1.46317e+07
P04217	ENSG00000121410	A1BG	12	12	897.41	0.525542	0.631708	1.08961	0.0986219	0.311992	0.447536	1.11785	0.177056	Outcome 1	Outcome 0	Alpha-1B-glycoprotein OS=Homo sapiens GN=A1BG PE=1 SV=4	1	4	8.56893e+06	6.27908e+06	6.09568e+06	8.35205e+06	7.92175e+06	4.72622e+06	6.06128e+06	7.56299e+06	9.41695e+06	1.03938e+07	6.99487e+06	6.5735e+06	8.08135e+06	1.22369e+07	2.19744e+06	1.36684e+07	5.17951e+06	9.64265e+06	9.22328e+06	1.11821e+07	9.33077e+06	9.10448e+06	8.96495e+06	4.2151e+06	6.2143e+06	9.57317e+06	1.11635e+07	5.56425e+06	5.02656e+06	1.16405e+07	5.19403e+06
P05090	ENSG00000189058	APOD	6	6	467.46	0.655647	0.662454	1.15599	0.0736702	0.760224	0.597545	1.11999	0.0610006	Outcome 0	Outcome 1	Apolipoprotein D OS=Homo sapiens GN=APOD PE=1 SV=1	1	4	8.26923e+06	1.35397e+07	3.8024e+07	8.0669e+06	8.19655e+06	6.48671e+06	3.70643e+06	5.05921e+06	2.37227e+07	1.0953e+07	5.24931e+06	6.66077e+06	7.46911e+06	1.51294e+07	2.1758e+06	1.47782e+07	9.30805e+06	1.31842e+07	4.76963e+06	1.21794e+07	1.16385e+07	5.07744e+06	1.28499e+07	9.69858e+06	3.72195e+06	1.57645e+07	1.82711e+07	1.38587e+07	5.47695e+06	1.15976e+07	7.87994e+06
P02765	ENSG00000145192	AHSG	8	8	659.59	0.343677	0.555724	1.12809	0.160917	0.784745	0.604645	1.02543	0.058799	Outcome 0	Outcome 1	Alpha-2-HS-glycoprotein OS=Homo sapiens GN=AHSG PE=1 SV=1	1	4	8.2663e+06	1.21633e+07	7.48119e+06	1.02674e+07	1.02455e+07	2.2894e+06	1.35893e+07	3.46315e+06	1.85237e+07	1.47601e+07	1.5011e+07	9.80865e+06	1.01866e+07	4.981e+06	5.4481e+06	1.66105e+07	6.77339e+06	1.19413e+07	8.04893e+06	2.10295e+07	6.47771e+06	8.5943e+06	1.316e+07	4.14424e+06	2.45051e+06	6.25942e+06	1.3197e+07	7.21332e+06	5.24141e+06	1.45784e+07	5.0198e+06
P61769	ENSG00000273686	B2M	4	4	244.37	0.32909	0.551565	1.11087	0.16808	0.289176	0.445827	1.13384	0.19012	Outcome 1	Outcome 0	Beta-2-microglobulin OS=Homo sapiens GN=B2M PE=1 SV=1	1	4	8.26407e+06	2.78966e+07	1.02496e+08	5.01217e+06	1.22041e+07	1.18505e+07	1.35789e+07	1.32211e+06	7.9895e+06	4.84081e+06	3.60536e+06	801898	1.1591e+06	8.9927e+06	1.07802e+06	2.96094e+07	6.48819e+06	2.59156e+06	3.29614e+06	1.64236e+07	1.40515e+07	4.188e+06	2.05415e+07	1.01322e+07	305087	4.93038e+07	6.73612e+07	5.58359e+07	1.19149e+07	5.44202e+07	7.92802e+06
P01743	ENSG00000282131	IGHV1-46	1	1	78.65	0.260057	0.511927	1.24523	0.208889	0.260057	0.42597	1.24523	0.208889	Outcome 1	Outcome 0	Ig heavy chain V-I region HG3 OS=Homo sapiens PE=3 SV=1	0	4	8.01219e+06	8.86577e+06	1.07416e+07	6.10951e+06	8.87166e+06	4.99117e+06	2.12455e+07	9.25756e+06	4.11918e+06	6.29673e+06	6.23578e+06	5.90072e+06	4.33036e+06	2.13341e+06	2.16699e+06	1.44986e+07	1.1102e+07	1.87713e+07	1.89448e+07	6.1968e+06	9.84526e+06	4.92025e+06	2.629e+07	6.0563e+06	6.82166e+06	1.74961e+07	7.91969e+06	1.09528e+07	1.56153e+07	7.75895e+06	1.77987e+07
P00751	ENSG00000243570	CFB	21	21	1295.92	0.36516	0.572485	1.09841	0.151115	0.311301	0.447536	1.14407	0.177433	Outcome 1	Outcome 0	Complement factor B OS=Homo sapiens GN=CFB PE=1 SV=2	1	4	7.77281e+06	7.18134e+06	3.23632e+06	1.47586e+07	7.12866e+06	7.34188e+06	4.13485e+06	5.15204e+06	7.43543e+06	4.50304e+06	3.79456e+06	5.0436e+06	8.29857e+06	1.19119e+07	1.52857e+06	1.00626e+07	5.20245e+06	3.25922e+06	9.59908e+06	1.86096e+07	9.87965e+06	1.23372e+07	5.81096e+06	2.40465e+06	1.14059e+07	4.26673e+06	7.06123e+06	1.8172e+06	4.46651e+06	1.07959e+07	3.20834e+06
P02750	ENSG00000171236	LRG1	12	12	825.97	0.475952	0.601212	1.22719	0.111685	0.107847	0.298645	1.3244	0.377358	Outcome 1	Outcome 0	Leucine-rich alpha-2-glycoprotein OS=Homo sapiens GN=LRG1 PE=1 SV=2	1	4	6.93565e+06	6.5039e+06	2.59058e+06	6.40057e+06	6.33462e+06	7.20855e+06	5.02463e+06	7.02874e+06	7.42632e+06	5.53802e+06	6.59196e+06	3.93778e+06	5.46473e+06	1.85752e+07	2.05537e+06	1.51597e+07	6.55996e+06	3.43873e+06	7.06635e+06	1.05352e+07	6.84257e+06	1.06615e+07	4.94608e+06	5.75199e+06	678996	3.37987e+06	4.44592e+06	6.22324e+06	8.86713e+06	8.14879e+06	3.97631e+06
P01625	ENSG00000211598	IGKV4-1	4	2	297.64	0.753188	0.691241	1.14131	0.0616827	0.753188	0.597545	1.14131	0.0616827	Outcome 1	Outcome 0	Ig kappa chain V-IV region Len OS=Homo sapiens PE=1 SV=2	0	4	6.65748e+06	3.45008e+06	4.83025e+06	5.83373e+06	4.92921e+06	4.66015e+06	6.37958e+06	7.16721e+06	4.49912e+06	6.35675e+06	3.46212e+06	9.76753e+06	6.1734e+06	6.72236e+06	4.27708e+06	9.41732e+06	8.12636e+06	7.40556e+06	1.00866e+07	1.78474e+07	8.37577e+06	7.68869e+06	9.75633e+06	3.91382e+06	6.64989e+06	9.07571e+06	7.08882e+06	6.32062e+06	1.31247e+07	5.09579e+06	7.31764e+06
P01019	ENSG00000135744	AGT	11	11	952.62	0.024619	0.31847	1.56071	0.644299	0.0162527	0.216789	1.5737	0.705546	Outcome 1	Outcome 0	Angiotensinogen OS=Homo sapiens GN=AGT PE=1 SV=1	1	4	6.28617e+06	9.03387e+06	1.02351e+07	3.84255e+06	6.44613e+06	8.54097e+06	5.38201e+06	3.22265e+06	4.66122e+06	4.7424e+06	5.95116e+06	2.53274e+06	4.03192e+06	1.09006e+07	383517	1.46144e+07	3.72965e+06	2.52118e+06	3.12885e+06	4.73681e+06	4.81514e+06	6.44159e+06	8.35817e+06	7.40033e+06	3.86052e+06	7.26993e+06	1.94485e+07	2.087e+07	6.46202e+06	1.88708e+07	4.06779e+06
P01717	ENSG00000211659	IGLV3-25	1	1	74.13	0.123477	0.38949	1.65482	0.350798	0.123477	0.316082	1.65482	0.350798	Outcome 1	Outcome 0	Ig lambda chain V-IV region Hil OS=Homo sapiens PE=1 SV=1	0	4	6.27246e+06	4.0089e+06	3.00901e+06	1.08079e+07	7.11362e+06	6.20534e+06	4.10712e+06	2.27199e+06	2.04692e+06	2.93019e+06	4.78121e+06	4.1842e+06	7.09719e+06	1.99146e+07	4.10922e+06	6.34509e+06	4.58242e+06	2.55258e+06	6.2512e+06	5.82608e+06	4.32203e+06	2.85792e+06	1.5931e+07	4.21733e+06	3.75176e+06	1.06223e+07	7.21493e+06	1.61464e+07	1.05878e+07	7.45255e+06	6.90372e+06
P02766	ENSG00000118271	TTR	6	6	665.99	0.684872	0.67423	1.1883	0.0695558	0.452391	0.519576	1.31836	0.118762	Outcome 1	Outcome 0	Transthyretin OS=Homo sapiens GN=TTR PE=1 SV=1	1	4	6.17788e+06	8.04887e+06	1.77835e+07	6.6239e+06	5.4275e+06	8.36021e+06	7.90777e+06	2.72846e+06	1.05787e+07	3.45582e+06	1.41903e+06	1.65374e+06	1.04729e+06	4.04911e+06	1.96949e+06	2.29764e+07	2.05438e+06	1.89415e+06	9.90107e+06	1.31355e+07	1.08901e+07	6.27685e+06	6.86536e+06	8.81418e+07	987370	4.33534e+06	8.83484e+06	8.46864e+06	3.27985e+06	7.68628e+06	7.63306e+06
P02788	ENSG00000012223	LTF	39	39	2937.61	0.132469	0.404337	1.21694	0.337012	0.225003	0.42597	1.238	0.235309	Outcome 0	Outcome 1	Lactotransferrin OS=Homo sapiens GN=LTF PE=1 SV=6	1	4	5.96188e+06	1.74176e+06	549858	2.42164e+07	1.82997e+07	3.97956e+06	2.60044e+06	3.28899e+07	1.57344e+07	3.93727e+06	1.59206e+07	2.01554e+07	1.70601e+07	4.03844e+06	1.79548e+07	8.10606e+06	1.30052e+07	4.17338e+07	2.6977e+07	8.42208e+07	3.6789e+06	5.17969e+06	1.05874e+06	1.44402e+06	5.85118e+06	894214	949198	2.82244e+06	5.12635e+06	1.74507e+06	6.07258e+06
P68871;P02100	ENSG00000244734	HBB	13	8	877.07	0.454813	0.600468	2.61767	0.118006	0.831532	0.612488	3.37229	0.0553254	Outcome 1	Outcome 0	Hemoglobin subunit beta OS=Homo sapiens GN=HBB PE=1 SV=2	0	4	5.87978e+06	534992	1.88909e+08	4.27052e+06	5.25164e+06	9.06119e+07	4.09404e+07	2.14422e+06	6.18299e+06	4.3031e+06	8.40293e+06	5.57658e+06	9.208e+06	2.63582e+06	6.76752e+06	1.01317e+07	1.16608e+07	2.35828e+07	6.60038e+06	2.77469e+07	3.14959e+06	4.18748e+07	7.68135e+07	1.3414e+06	3.84794e+06	3.02966e+06	1.37855e+08	885280	1.95225e+06	529489	1.98281e+06
P08246	ENSG00000197561	ELANE	4	4	361.83	0.0778412	0.344342	1.72674	0.440841	0.089141	0.289995	1.73865	0.414592	Outcome 0	Outcome 1	Neutrophil elastase OS=Homo sapiens GN=ELANE PE=1 SV=1	0	4	5.53994e+06	2.45728e+06	2.57402e+06	6.15993e+06	4.22278e+06	1.87019e+07	1.03183e+07	6.25522e+06	4.84347e+06	3.96984e+06	3.3852e+06	6.45695e+06	1.91342e+07	2.62221e+06	486605	1.96495e+07	5.54177e+06	1.64502e+07	8.15767e+06	1.99927e+07	2.99574e+07	8.70582e+06	964936	1.35334e+07	7.64507e+06	2.22445e+06	1.07968e+06	6.34298e+06	6.39537e+06	2.27457e+06	7.17438e+06
P02749	ENSG00000091583	APOH	12	12	514.47	0.465731	0.600468	1.1663	0.11468	0.476606	0.528124	1.12891	0.111497	Outcome 1	Outcome 0	Beta-2-glycoprotein 1 OS=Homo sapiens GN=APOH PE=1 SV=3	1	4	5.16646e+06	6.81766e+06	4.10934e+06	5.14637e+06	5.05088e+06	2.62151e+06	2.90173e+06	3.81922e+06	8.91329e+06	5.34078e+06	2.47199e+06	4.43352e+06	5.07447e+06	5.18655e+06	1.63252e+06	6.29169e+06	3.37788e+06	5.96058e+06	4.6907e+06	6.29578e+06	4.05783e+06	3.73861e+06	5.82575e+06	9.75893e+06	2.50379e+06	5.30578e+06	6.17228e+06	5.57956e+06	4.74343e+06	9.60806e+06	1.50171e+06
P01714	ENSG00000211663	IGLV3-19	2	2	134.65	0.473027	0.600468	1.10722	0.112531	0.473027	0.527609	1.10722	0.112531	Outcome 1	Outcome 0	Ig lambda chain V-III region SH OS=Homo sapiens PE=1 SV=1	0	4	5.00056e+06	4.39241e+06	2.53321e+06	4.22722e+06	1.02358e+07	4.06316e+06	8.52742e+06	2.35538e+07	2.23361e+06	4.49941e+06	2.40254e+06	1.16576e+06	3.85022e+06	3.09684e+06	2.62383e+06	3.81017e+06	3.83054e+06	5.93747e+06	7.21285e+06	4.96899e+06	2.0521e+07	805259	1.15649e+07	5.17575e+06	1.96025e+06	1.03779e+07	6.88722e+06	9.84548e+06	7.35476e+06	5.70554e+06	2.29967e+07
P41222	ENSG00000107317	PTGDS	6	5	423.97	0.23155	0.49922	1.30146	0.230009	0.22957	0.42597	1.36108	0.231593	Outcome 0	Outcome 1	Prostaglandin-H2 D-isomerase OS=Homo sapiens GN=PTGDS PE=1 SV=1	1	4	4.43102e+06	5.37726e+06	3.81643e+07	4.87837e+06	7.69965e+06	3.90111e+06	4.41675e+06	1.78458e+06	1.47689e+07	6.13641e+06	2.39527e+06	1.25138e+06	4.11101e+06	1.40296e+07	2.2527e+06	1.91877e+07	3.89106e+06	7.00646e+06	4.0363e+06	5.22625e+06	4.17375e+06	6.45882e+06	1.64945e+06	9.57862e+06	1.05806e+06	8.95483e+06	3.55735e+07	1.08893e+07	3.73921e+06	5.68555e+06	5.30933e+06
P60709;A5A3E0;Q6S8J3;P0CG38;P0CG39;Q9BYX7	ENSG00000075624	ACTB	20	6	1290.91	0.418251	0.591283	1.61321	0.130169	0.492264	0.529909	1.79367	0.107128	Outcome 0	Outcome 1	Actin, cytoplasmic 1 OS=Homo sapiens GN=ACTB PE=1 SV=1	0	4	4.41074e+06	2.58795e+06	5.53762e+06	3.96691e+06	635674	4.24468e+07	1.43701e+07	4.5935e+06	7.88369e+06	3.72216e+06	2.18189e+06	3.49946e+06	3.40442e+06	1.81053e+06	1.37613e+06	2.80604e+07	3.32092e+06	3.40663e+06	6.98737e+06	9.00827e+06	2.61079e+07	8.40042e+06	5.02374e+06	3.0929e+06	9.96214e+06	4.18325e+06	2.88012e+06	1.6555e+07	2.52534e+06	3.70731e+06	6.78971e+06
P04004	ENSG00000109072	VTN	7	7	446.85	0.746672	0.689922	1.10679	0.0623351	0.788418	0.605483	1.0458	0.0584924	Outcome 1	Outcome 0	Vitronectin OS=Homo sapiens GN=VTN PE=1 SV=1	1	4	4.22685e+06	4.33255e+06	1.84441e+06	3.22748e+06	4.23868e+06	2.44539e+06	4.21501e+06	2.63159e+06	4.2704e+06	4.54218e+06	3.3943e+06	4.09326e+06	4.60356e+06	1.04109e+07	1.98588e+06	8.00083e+06	4.13458e+06	4.94315e+06	4.00666e+06	7.32438e+06	2.39971e+06	5.46753e+06	5.82069e+06	4.19438e+06	2.01092e+06	2.94123e+06	2.14519e+06	1.31638e+06	4.96847e+06	4.76549e+06	1.44939e+06
P69905	ENSG00000188536	HBA2	8	8	592.37	0.727155	0.682318	2.85439	0.0644097	0.857575	0.623772	1.88444	0.0537858	Outcome 1	Outcome 0	Hemoglobin subunit alpha OS=Homo sapiens GN=HBA1 PE=1 SV=2	0	4	4.16854e+06	1.46195e+06	1.06688e+08	3.23201e+06	3.01372e+06	9.32062e+07	4.97163e+07	1.64086e+06	6.59111e+06	4.99552e+06	4.3748e+06	4.18139e+06	7.60561e+06	2.75997e+06	2.88154e+06	5.96428e+06	2.14859e+06	1.50338e+07	3.95419e+06	3.13676e+07	3.25053e+06	4.70994e+07	8.18709e+07	3.28875e+06	2.26893e+06	4.12109e+06	6.2245e+07	2.0417e+06	1.05319e+06	1.02086e+06	3.89557e+06
P04433	ENSG00000241351	IGKV3-11	2	2	110.24	0.0740142	0.344342	1.64718	0.450529	0.0740142	0.272888	1.64718	0.450529	Outcome 1	Outcome 0	Ig kappa chain V-III region VG (Fragment) OS=Homo sapiens PE=1 SV=1	0	4	4.07029e+06	4.88783e+06	5.74243e+06	2.00244e+06	3.05133e+06	4.08207e+06	1.28162e+07	904693	1.19487e+06	4.44529e+06	710743	862459	2.06899e+06	2.61021e+06	344148	3.52652e+06	563510	902393	5.29886e+06	4.8408e+06	9.74162e+06	8.20013e+06	1.15412e+07	3.56262e+06	3.67179e+06	2.39287e+07	799036	7.40207e+06	6.95056e+06	2.77481e+06	1.23352e+06
P01764;P01768	ENSG00000282777	IGHV3-30	2	1	146.29	0.0192763	0.293329	1.50105	0.681272	0.0192763	0.216789	1.50105	0.681272	Outcome 1	Outcome 0	Ig heavy chain V-III region 23 OS=Homo sapiens GN=IGHV3-23 PE=1 SV=2	0	4	3.86047e+06	1.94208e+06	3.0746e+06	649626	1.19951e+06	1.47966e+06	2.53892e+06	3.2173e+06	4.13533e+06	2.692e+06	3.38584e+06	4.43924e+06	5.44785e+06	2.35907e+06	1.34566e+06	8.34339e+06	2.68514e+06	4.00327e+06	1.99956e+06	4.01298e+06	2.17548e+06	5.09336e+06	4.8194e+06	2.14176e+06	3.77789e+06	3.59993e+06	5.73507e+06	4.2759e+06	4.2351e+06	1.49961e+06	2.03975e+06
P25311	ENSG00000160862	AZGP1	7	7	367.56	0.0232896	0.316337	1.33437	0.652908	0.0312346	0.269408	1.32577	0.605966	Outcome 1	Outcome 0	Zinc-alpha-2-glycoprotein OS=Homo sapiens GN=AZGP1 PE=1 SV=2	1	4	3.80544e+06	4.8078e+06	2.74972e+06	3.75114e+06	3.78757e+06	3.85883e+06	2.05087e+06	3.24505e+06	5.49557e+06	2.78494e+06	3.47147e+06	2.95248e+06	1.62595e+06	5.78308e+06	1.48879e+06	4.77978e+06	3.49387e+06	4.20681e+06	3.82332e+06	3.49269e+06	3.50429e+06	2.7986e+06	6.90386e+06	5.15363e+06	4.27521e+06	4.67789e+06	6.44431e+06	7.81384e+06	3.67284e+06	8.58625e+06	1.32726e+06
P07737	ENSG00000108518	PFN1	9	9	621.13	0.206371	0.48329	1.09899	0.251455	0.165532	0.368289	1.00277	0.293583	Outcome 1	Outcome 0	Profilin-1 OS=Homo sapiens GN=PFN1 PE=1 SV=2	1	4	3.78474e+06	1.22249e+06	6.30814e+06	4.40729e+06	915869	1.80914e+07	6.88563e+06	8.55913e+06	9.39766e+06	2.04348e+06	2.0828e+06	5.77589e+06	8.17572e+06	1.10708e+06	3.86193e+06	1.19442e+07	3.09783e+06	8.68506e+06	8.06786e+06	5.40431e+06	2.38938e+07	7.20956e+06	5.70276e+06	1.85074e+06	2.88251e+07	2.1947e+06	575186	6.52527e+06	2.62264e+06	2.35874e+06	2.85514e+06
P80748	ENSG00000211662	IGLV3-21	1	1	128.63	0.04556	0.344342	1.41518	0.540778	0.04556	0.269408	1.41518	0.540778	Outcome 1	Outcome 0	Ig lambda chain V-III region LOI OS=Homo sapiens PE=1 SV=1	1	4	3.59419e+06	1.44386e+06	1.64517e+06	2.13352e+06	8.55271e+06	1.83207e+06	4.50365e+06	2.43286e+06	3.21921e+06	2.27852e+06	4.15508e+06	3.59666e+06	2.17971e+06	5.04954e+06	1.03704e+06	4.06769e+06	3.41667e+06	6.85794e+06	3.25315e+06	4.42134e+06	3.64652e+06	89553.9	6.61211e+06	2.0168e+06	3.31168e+06	3.59171e+06	6.24094e+06	1.12818e+07	3.14259e+06	4.42517e+06	2.2901e+06
P05155	ENSG00000149131	SERPING1	14	14	730.99	0.0702642	0.344342	1.3258	0.460472	0.0507855	0.269408	1.36376	0.521138	Outcome 1	Outcome 0	Plasma protease C1 inhibitor OS=Homo sapiens GN=SERPING1 PE=1 SV=2	1	4	3.59189e+06	4.01344e+06	6.36904e+06	3.40371e+06	2.37875e+06	2.63167e+06	2.14226e+06	3.21439e+06	407278	3.37066e+06	3.44453e+06	4.0521e+06	1.66517e+06	5.53584e+06	2.19782e+06	3.38478e+06	1.60892e+06	5.13909e+06	3.99321e+06	5.12282e+06	1.8322e+06	3.65252e+06	6.65031e+06	3.36878e+06	4.24134e+06	7.20249e+06	9.5238e+06	9.85093e+06	2.81623e+06	7.78749e+06	1.12492e+06
P62805	ENSG00000270882	HIST2H4A	7	7	535.02	0.42331	0.591283	1.24471	0.128386	0.452025	0.519576	1.25349	0.118877	Outcome 0	Outcome 1	Histone H4 OS=Homo sapiens GN=HIST1H4A PE=1 SV=2	0	4	3.08366e+06	514805	1.38134e+06	5.41627e+06	628718	3.29988e+06	685861	1.52855e+07	3.13809e+07	913149	4.31204e+06	4.31487e+06	1.47253e+07	535301	8.40612e+06	9.02538e+06	1.05411e+07	1.93863e+07	1.27559e+07	4.38159e+06	2.48377e+06	753742	348269	4.70841e+06	1.17118e+07	741400	498328	3.91786e+06	1.04221e+06	2.58034e+06	1.43228e+06
P08603;Q02985;Q03591	ENSG00000000971	CFH	34	34	1934.48	0.826535	0.719655	1.0043	0.0556524	0.893214	0.635924	1.00563	0.0521158	Outcome 0	Outcome 1	Complement factor H OS=Homo sapiens GN=CFH PE=1 SV=4	0	4	2.91186e+06	2.84373e+06	1.62489e+06	4.02401e+06	2.24211e+06	2.18283e+06	2.6298e+06	2.4304e+06	4.60115e+06	2.27925e+06	2.42207e+06	1.90827e+06	2.48768e+06	4.0777e+06	2.1737e+06	3.64289e+06	2.69502e+06	3.45198e+06	4.02007e+06	6.0061e+06	2.64317e+06	4.77218e+06	2.67982e+06	1.33873e+06	1.39588e+06	2.07482e+06	2.3649e+06	3.1586e+06	2.60915e+06	4.06069e+06	2.46691e+06
P01598;P01596;P01602	ENSG00000282801	IGKV1-5	3	1	257.27	0.0259031	0.31985	1.69286	0.636302	0.0259031	0.242693	1.69286	0.636302	Outcome 1	Outcome 0	Ig kappa chain V-I region EU OS=Homo sapiens PE=1 SV=1	0	4	2.85881e+06	2.20172e+06	3.78796e+06	1.31485e+06	1.81475e+06	1.76879e+06	5.97504e+06	1.35376e+06	1.10446e+06	2.92841e+06	1.33329e+06	1.93441e+06	2.16654e+06	3.38442e+06	988141	2.53234e+06	1.0108e+06	2.78921e+06	1.38381e+06	2.12137e+06	2.48647e+06	4.05566e+06	7.92382e+06	2.62296e+06	1.87271e+06	8.53034e+06	4.16245e+06	6.97273e+06	8.52542e+06	4.02063e+06	6.13235e+06
P00734	ENSG00000180210	F2	12	12	728.63	0.633576	0.654426	1.15527	0.0771033	0.522799	0.548029	1.14866	0.0992852	Outcome 1	Outcome 0	Prothrombin OS=Homo sapiens GN=F2 PE=1 SV=2	1	4	2.54174e+06	3.53239e+06	2.7924e+06	4.412e+06	2.51867e+06	2.70819e+06	1.82726e+06	953474	2.91712e+06	2.9252e+06	988228	712759	722999	4.10849e+06	425194	2.76105e+06	1.13198e+06	1.11181e+06	3.27461e+06	2.52764e+06	1.83765e+06	3.51562e+06	4.06e+06	1.58525e+06	416252	278745	2.71681e+06	2.62917e+06	2.55584e+06	6.06373e+06	828058
P01042	ENSG00000113889	KNG1	11	11	625.09	0.240945	0.499594	1.29637	0.222711	0.052082	0.269408	1.35139	0.516527	Outcome 1	Outcome 0	Kininogen-1 OS=Homo sapiens GN=KNG1 PE=1 SV=2	1	4	2.48401e+06	2.92569e+06	35371.1	1.62693e+06	2.36697e+06	1.58652e+06	2.26907e+06	869281	1.95768e+06	2.53815e+06	1.13533e+06	560303	611524	4.97818e+06	465131	4.56418e+06	731384	1.42506e+06	2.84309e+06	6.55598e+06	2.78843e+06	3.27219e+06	3.89586e+06	1.11484e+06	36316.7	179106	1.52991e+06	2.36167e+06	1.87166e+06	2.5431e+06	2.66822e+06
P14780	ENSG00000100985	MMP9	14	14	950.36	0.968605	0.760481	1.21929	0.0501816	0.604555	0.565655	1.07972	0.0820758	Outcome 1	Outcome 0	Matrix metalloproteinase-9 OS=Homo sapiens GN=MMP9 PE=1 SV=3	0	4	2.42928e+06	445990	292658	3.81457e+06	1.50462e+06	991007	849425	8.90233e+06	5.25264e+06	2.08657e+06	3.06806e+06	2.73633e+06	1.95291e+06	4.28066e+06	2.5725e+06	2.16721e+06	3.64481e+06	3.0669e+06	3.97284e+06	3.43665e+06	1.79636e+06	2.0245e+06	272683	1.91396e+06	4.78554e+06	557079	374390	336311	2.07892e+06	431859	1.0219e+06
Q5QNW6;P06899;Q96A08	ENSG00000203814	HIST2H2BF	5	5	449.04	0.161076	0.438025	1.33251	0.298867	0.174441	0.378329	1.27025	0.283468	Outcome 0	Outcome 1	Histone H2B type 2-F OS=Homo sapiens GN=HIST2H2BF PE=1 SV=3	0	4	2.39247e+06	1.13691e+06	2.03667e+06	1.48358e+06	872276	2.25296e+06	1.24177e+06	1.35245e+07	2.21374e+07	2.41665e+06	2.81084e+06	2.30025e+06	1.17871e+07	910620	3.3974e+06	9.40394e+06	4.8839e+06	1.53429e+07	7.59953e+06	3.56165e+06	3.47619e+06	2.29264e+06	648517	5.39196e+06	8.36511e+06	556098	247311	4.32014e+06	1.76399e+06	2.7139e+06	2.036e+06
Q9Y2P4	ENSG00000113396	SLC27A6	1	1	36.31	0.816931	0.718198	1.27572	0.05631	0.816931	0.612488	1.27572	0.05631	Outcome 1	Outcome 0	Long-chain fatty acid transport protein 6 OS=Homo sapiens GN=SLC27A6 PE=2 SV=1	0	4	2.36229e+06	1.28897e+06	2.5017e+06	1.90796e+06	2.2012e+06	959610	2.1481e+06	1.91755e+06	1.68352e+06	937765	1.48385e+06	2.86015e+06	2.51145e+06	2.93982e+06	1.26786e+06	4.53249e+06	3.4331e+06	4.21637e+06	1.09688e+06	5.87721e+06	2.75231e+06	5.02562e+06	2.07601e+06	1.14559e+06	1.90903e+06	1.34503e+06	5.08337e+06	1.98756e+06	1.0567e+06	7.74343e+06	546148
P01781	ENSG00000211938	IGHV3-7	2	1	133.51	0.62463	0.654426	1.15427	0.078579	0.62463	0.565655	1.15427	0.078579	Outcome 1	Outcome 0	Ig heavy chain V-III region GAL OS=Homo sapiens PE=1 SV=1	1	4	2.36153e+06	1.55055e+06	2.11044e+06	791478	2.55081e+06	958944	1.99775e+06	5.76578e+06	1.57404e+06	2.00256e+06	2.55293e+06	3.53022e+06	2.20176e+06	2.67914e+06	770102	3.31575e+06	1.26325e+06	1.30351e+06	2.29991e+06	6.9433e+06	1.31766e+06	2.36445e+06	5.4694e+06	421907	1.81886e+06	7.01988e+06	2.60366e+06	2.13706e+06	2.70747e+06	2.20123e+06	2.34027e+06
P04003	ENSG00000123838	C4BPA	11	11	719.09	0.383216	0.578348	1.15603	0.143503	0.612322	0.565655	1.12175	0.080692	Outcome 0	Outcome 1	C4b-binding protein alpha chain OS=Homo sapiens GN=C4BPA PE=1 SV=2	1	4	2.29662e+06	2.57828e+06	445325	2.55562e+06	2.2917e+06	1.11755e+06	1.31397e+06	4.17343e+06	2.80851e+06	1.80721e+06	2.82307e+06	3.33768e+06	1.36235e+06	4.89605e+06	4.17731e+06	2.10288e+06	3.36525e+06	3.3158e+06	6.97221e+06	4.54464e+06	1.2847e+06	4.26356e+06	911312	2.27455e+06	1.57899e+06	830648	2.10246e+06	497076	1.62279e+06	2.72218e+06	982639
Q14624	ENSG00000055955	ITIH4	13	13	917.08	0.0981653	0.364275	1.32982	0.39578	0.112866	0.298645	1.27176	0.368435	Outcome 1	Outcome 0	Inter-alpha-trypsin inhibitor heavy chain H4 OS=Homo sapiens GN=ITIH4 PE=1 SV=4	1	4	2.21865e+06	1.74815e+06	903622	2.42652e+06	2.19551e+06	1.94422e+06	1.31977e+06	2.5504e+06	2.66481e+06	2.55581e+06	1.3866e+06	1.96598e+06	2.18144e+06	3.75283e+06	1.88064e+06	2.40393e+06	1.79722e+06	1.72903e+06	2.5014e+06	1.55191e+06	2.01994e+06	3.6099e+06	1.98518e+06	1.98074e+06	1.94719e+06	2.09633e+06	2.07168e+06	2.32594e+06	1.3278e+06	3.81571e+06	1.48075e+06
P02748	ENSG00000113600	C9	7	7	505.43	0.163154	0.438025	1.22647	0.296383	0.142222	0.350662	1.25693	0.323108	Outcome 1	Outcome 0	Complement component C9 OS=Homo sapiens GN=C9 PE=1 SV=2	1	4	2.14391e+06	2.66976e+06	4.53085e+06	2.89338e+06	1.91072e+06	811394	1.7379e+06	562985	1.74697e+06	2.19226e+06	567183	822839	402265	3.30919e+06	517275	760937	580358	1.06889e+06	3.75716e+06	3.07098e+06	2.08116e+06	3.23293e+06	3.73575e+06	1.32642e+06	929813	2.74082e+06	4.32494e+06	2.69619e+06	1.85548e+06	2.15472e+06	368948
P06396	ENSG00000148180	GSN	16	15	928.38	0.409607	0.591283	1.10029	0.133295	0.428804	0.51139	1.07032	0.126487	Outcome 0	Outcome 1	Gelsolin OS=Homo sapiens GN=GSN PE=1 SV=1	1	4	2.11811e+06	2.07662e+06	4.98702e+06	2.23107e+06	2.29485e+06	3.15985e+06	2.29081e+06	1.71127e+06	4.45541e+06	2.1596e+06	1.23317e+06	1.89522e+06	1.62553e+06	2.23792e+06	1.35989e+06	3.40872e+06	1.44877e+06	1.64743e+06	2.67994e+06	3.14503e+06	4.47007e+06	2.01939e+06	1.75527e+06	1.57133e+06	4.35439e+06	2.6241e+06	2.99711e+06	3.19302e+06	1.84814e+06	2.52627e+06	2.27713e+06
P68032;P62736	ENSG00000159251	ACTC1	13	1	840.42	0.331844	0.551565	1.43085	0.166694	0.454734	0.519576	2.11412	0.118031	Outcome 0	Outcome 1	Actin, alpha cardiac muscle 1 OS=Homo sapiens GN=ACTC1 PE=1 SV=1	0	4	1.98555e+06	1.53513e+06	943253	1.41536e+06	769740	2.14006e+07	7.66917e+06	3.54755e+06	4.62793e+06	2.14586e+06	787833	1.49135e+06	1.26703e+06	989550	1.4237e+06	1.30856e+07	2.13229e+06	3.41773e+06	3.34094e+06	2.09444e+06	1.42912e+07	4.67791e+06	2.77299e+06	925574	5.49396e+06	1.47195e+06	859384	1.04011e+07	1.05475e+06	2.71933e+06	3.29642e+06
P05164;P11678	ENSG00000005381	MPO	24	24	1724.85	0.12953	0.399856	1.75838	0.341411	0.1521	0.356266	1.64708	0.310008	Outcome 0	Outcome 1	Myeloperoxidase OS=Homo sapiens GN=MPO PE=1 SV=1	0	4	1.98397e+06	472918	2.55286e+06	3.17091e+06	1.26469e+06	916030	657556	9.91748e+06	1.67827e+07	1.30068e+06	5.57204e+06	8.30164e+06	1.35162e+07	884836	1.13277e+07	4.57187e+06	1.18863e+07	3.20995e+07	5.17938e+06	5.84592e+06	1.99387e+06	933370	423202	1.20367e+06	6.03384e+06	2.83911e+06	1.63171e+06	1.09119e+06	1.13942e+06	1.27412e+06	1.13349e+06
P23083	ENSG00000211934	IGHV1-2	3	3	229.06	0.701271	0.674992	1.05398	0.0674506	0.701271	0.57997	1.05398	0.0674506	Outcome 0	Outcome 1	Ig heavy chain V-I region V35 OS=Homo sapiens PE=1 SV=1	0	4	1.98041e+06	397697	4.79963e+06	444594	1.77888e+06	440589	4.85404e+06	498061	1.83562e+06	1.79652e+06	371413	2.10428e+06	565913	770159	539980	1.98719e+06	6.63858e+06	7.16141e+06	9.71332e+06	2.49759e+06	4.08262e+06	2.69774e+06	4.4892e+06	3.13995e+06	1.52132e+06	1.9737e+06	2.66454e+06	1.98711e+06	763855	288117	8.74506e+06
P22894	ENSG00000118113	MMP8	10	10	553.46	0.0362203	0.344342	2.33826	0.581002	0.0163322	0.216789	2.10394	0.70487	Outcome 1	Outcome 0	Neutrophil collagenase OS=Homo sapiens GN=MMP8 PE=1 SV=1	0	4	1.95223e+06	1.04951e+06	5.35114e+06	2.0214e+06	2.38882e+06	3.68556e+06	1.54605e+06	3.0986e+06	996014	889194	1.19145e+06	786447	642965	1.31926e+06	1.40793e+06	978236	2.08802e+06	1.18883e+06	1.1231e+06	3.48507e+06	2.7513e+06	1.51591e+06	4.32806e+06	1.29711e+06	3.58627e+06	1.6178e+06	2.49562e+06	1.35179e+06	2.81053e+06	463654	1.31581e+06
P06331	ENSG00000276491	IGHV4-34	1	1	53.28	0.312337	0.551565	1.10962	0.176868	0.312337	0.447536	1.10962	0.176868	Outcome 1	Outcome 0	Ig heavy chain V-II region ARH-77 OS=Homo sapiens PE=4 SV=1	0	4	1.90538e+06	2.77494e+06	3.60151e+06	1.25641e+06	805172	891877	4.57694e+06	1.36223e+06	513604	2.00267e+06	692856	741875	1.42167e+06	971967	396280	1.11717e+06	6.55883e+06	2.40264e+06	3.45237e+06	2.08163e+06	3.39637e+06	1.82852e+06	3.75841e+06	1.31287e+06	1.98224e+06	5.39034e+06	2.57684e+06	2.42038e+06	2.84994e+06	2.0264e+06	3.21641e+06
P01008	ENSG00000117601	SERPINC1	13	13	786.38	0.561902	0.637633	1.0832	0.0904196	0.495198	0.529909	1.09718	0.106336	Outcome 1	Outcome 0	Antithrombin-III OS=Homo sapiens GN=SERPINC1 PE=1 SV=1	1	4	1.86884e+06	4.03312e+06	2.29511e+06	1.28333e+06	1.87315e+06	2.0188e+06	1.86454e+06	933366	1.073e+06	2.50313e+06	1.03372e+06	1.04535e+06	968418	4.08006e+06	1.1061e+06	2.24571e+06	1.11568e+06	1.55277e+06	2.15167e+06	2.12499e+06	1.69172e+06	3.41413e+06	4.98248e+06	1.32451e+06	1.09643e+06	2.9535e+06	2.64195e+06	2.85489e+06	1.32685e+06	5.85189e+06	581290
P02741	ENSG00000132693	CRP	7	7	381.28	0.139678	0.407284	1.33999	0.326638	0.15645	0.362828	1.30079	0.304523	Outcome 1	Outcome 0	C-reactive protein OS=Homo sapiens GN=CRP PE=1 SV=1	1	4	1.72817e+06	284846	209553	6.83252e+06	1.43163e+06	5.16868e+06	1.87746e+06	444360	509573	493601	1.1654e+06	1.21803e+06	3.56003e+06	9.94498e+06	181257	2.38694e+06	886857	521580	2.30762e+06	1.8002e+06	4.19864e+06	4.93546e+06	1.02939e+06	583843	558164	559661	1.03985e+06	3.70879e+06	1.27327e+06	551777	1.85886e+06
P02649	ENSG00000130203	APOE	11	11	728.2	0.142464	0.407284	1.1387	0.322776	0.136278	0.339581	1.07997	0.33146	Outcome 1	Outcome 0	Apolipoprotein E OS=Homo sapiens GN=APOE PE=1 SV=1	1	4	1.7128e+06	4.5299e+06	1.30597e+07	733873	2.00024e+06	1.04114e+06	1.89288e+06	324202	1.91818e+06	2.22237e+06	388354	96823	560813	2.21225e+06	133952	2.08577e+06	548721	395162	1.35437e+06	993219	1.10314e+06	3.21617e+06	3.40328e+06	1.47729e+06	603125	2.82136e+06	4.14055e+06	6.44978e+06	1.53893e+06	4.07549e+06	1.04657e+06
P20160	ENSG00000172232	AZU1	3	3	167.78	0.337533	0.55347	1.39204	0.163881	0.337533	0.466124	1.39204	0.163881	Outcome 0	Outcome 1	Azurocidin OS=Homo sapiens GN=AZU1 PE=1 SV=3	0	4	1.7009e+06	1.83644e+06	58250.2	997116	2.09595e+06	663104	1.36995e+06	3.41327e+06	7.56755e+06	1.28052e+06	1.64224e+06	2.93079e+06	7.25716e+06	1.0005e+06	2.85648e+06	2.03782e+06	5.80653e+06	2.02136e+07	3.28977e+06	3.90966e+06	1.75955e+06	924223	964581	463169	3.81189e+06	152712	792702	236193	1.3932e+06	2.77987e+06	326566
P00747	ENSG00000122194	PLG	15	15	721.3	0.957092	0.75362	1.01335	0.0503394	0.879995	0.629364	1.00971	0.0526773	Outcome 0	Outcome 1	Plasminogen OS=Homo sapiens GN=PLG PE=1 SV=2	1	4	1.65781e+06	1.90458e+06	201672	2.82727e+06	2.56001e+06	718003	839564	2.23616e+06	1.81306e+06	1.56982e+06	1.54467e+06	1.66929e+06	1.91583e+06	1.81453e+06	614807	1.448e+06	1.63665e+06	2.79493e+06	4.74443e+06	4.63188e+06	433417	1.40148e+06	1.31724e+06	1.24661e+06	907377	239585	275340	622720	1.64633e+06	2.29641e+06	753354
P01033	ENSG00000102265	TIMP1	5	5	241.47	0.0997557	0.364275	1.01042	0.392636	0.0889278	0.289995	1.03525	0.415058	Outcome 1	Outcome 0	Metalloproteinase inhibitor 1 OS=Homo sapiens GN=TIMP1 PE=1 SV=1	1	4	1.63994e+06	810960	1.56463e+06	3.84949e+06	348588	1.44949e+07	509768	799795	1.09773e+07	369440	678482	382547	669406	1.45183e+06	285113	6.81624e+06	894965	421558	670480	5.92579e+06	4.67805e+06	317804	1.35314e+06	3.94635e+06	4.24254e+06	2.39383e+06	2.82125e+06	9.68432e+06	1.40114e+06	3.51787e+06	4.45484e+06
Q99459	ENSG00000096401	CDC5L	1	1	34.44	0.102025	0.364275	1.45505	0.388233	0.102025	0.298645	1.45505	0.388233	Outcome 1	Outcome 0	Cell division cycle 5-like protein OS=Homo sapiens GN=CDC5L PE=1 SV=2	0	4	1.6307e+06	1.52252e+06	1.1742e+06	1.87966e+06	4.68667e+06	599597	5.57721e+06	1.55752e+06	1.17247e+06	1.60057e+06	1.36564e+06	1.23716e+06	1.46693e+06	532548	505160	1.35165e+06	1.08158e+06	2.71764e+06	4.54399e+06	2.65259e+06	3.46844e+06	1.3484e+06	2.57185e+06	1.10366e+06	1.61435e+06	5.91193e+06	991961	2.65971e+06	1.48723e+07	5.37903e+06	6.26168e+06
P04196	ENSG00000113905	HRG	7	7	417.01	0.0733026	0.344342	1.27307	0.452381	0.0483965	0.269408	1.28597	0.529898	Outcome 0	Outcome 1	Histidine-rich glycoprotein OS=Homo sapiens GN=HRG PE=1 SV=1	1	4	1.57507e+06	2.0894e+06	896287	539373	1.86155e+06	856430	1.84318e+06	1.54266e+06	2.39976e+06	2.52315e+06	3.27254e+06	1.8698e+06	1.03099e+06	1.67299e+06	1.79328e+06	965151	1.57471e+06	2.96126e+06	2.53087e+06	3.37297e+06	1.32957e+06	1.74637e+06	1.924e+06	1.2458e+06	437963	1.30038e+06	539514	558319	1.25612e+06	2.32626e+06	1.11447e+06
P01700;P01707	ENSG00000211648	IGLV1-47	2	1	121.17	0.442948	0.600468	1.42882	0.121774	0.113475	0.298645	1.76264	0.367378	Outcome 1	Outcome 0	Ig lambda chain V-I region HA OS=Homo sapiens PE=1 SV=1	0	3	1.54323e+06	1.18848e+06	1.45351e+06	1.78052e+06	4.18319e+06	1.52091e+06	735037	1.17648e+06	833112	906344	1.0285e+06	640253	826417	978201	406902	1.8621e+06	1.33047e+06	2.59876e+06	1.56554e+06	1.37154e+06	1.95901e+06	1.11059e+06	2.35512e+06	958015	871728	4.48302e+06	2.94161e+06	2.94529e+06	1.85359e+06	625759	228172
P04430	ENSG00000240864	IGKV1-16	1	1	44.53	0.0616032	0.344342	3.36018	0.48537	0.0616032	0.269408	3.36018	0.48537	Outcome 0	Outcome 1	Ig kappa chain V-I region BAN OS=Homo sapiens PE=1 SV=1	0	3	1.51525e+06	804541	3.1194e+06	1.86229e+06	1.09692e+06	251042	654483	2.8209e+06	2.14359e+06	38572.7	4.90064e+06	4.56867e+06	5.72393e+06	209437	1.89404e+06	514860	1.05918e+07	6.60469e+06	2.45786e+06	4.0246e+06	4.40063e+07	773432	782385	408899	65198.2	2.21979e+06	401758	1.58907e+06	248801	302879	218874
Q6FI13;P04908;P0C0S5;Q8IUE6	ENSG00000203812	HIST2H2AA3	4	4	249.64	0.555955	0.637633	1.11031	0.0916888	0.619955	0.565655	1.08075	0.0793701	Outcome 0	Outcome 1	Histone H2A type 2-A OS=Homo sapiens GN=HIST2H2AA3 PE=1 SV=3	0	3	1.47746e+06	608678	627002	1.77951e+06	226885	2.49334e+06	750794	7.0628e+06	1.1039e+07	1.10428e+06	1.27451e+06	723996	5.3726e+06	780106	603900	8.33404e+06	2.35686e+06	5.89656e+06	6.37607e+06	1.79988e+06	2.07953e+06	563589	281406	4.2327e+06	4.25542e+06	330115	152078	3.66548e+06	1.07096e+06	2.19647e+06	1.17088e+06
P01611	ENSG00000278857	IGKV1D-12	1	1	110.34	0.450009	0.600468	1.13828	0.119512	0.450009	0.519576	1.13828	0.119512	Outcome 1	Outcome 0	Ig kappa chain V-I region Wes OS=Homo sapiens PE=1 SV=1	0	3	1.45807e+06	2.25171e+06	34706.5	2.44959e+06	1.90312e+07	359312	4.91005e+06	1.42689e+06	937487	868726	1.63326e+06	1.28705e+06	310290	1.05503e+06	884838	1.48069e+06	1.0274e+06	2.6196e+06	2.77607e+06	1.51377e+06	9.16441e+06	716040	4.386e+06	1.43545e+06	3.69637e+06	182316	315687	736226	904731	2.13119e+06	2.17428e+07
P04406	ENSG00000111640	GAPDH	8	8	542.22	0.897161	0.749586	1.81634	0.0519612	0.694332	0.57865	1.81891	0.068324	Outcome 0	Outcome 1	Glyceraldehyde-3-phosphate dehydrogenase OS=Homo sapiens GN=GAPDH PE=1 SV=3	1	3	1.32856e+06	1.07474e+06	610197	423506	212132	1.63776e+07	6.06119e+06	436140	1.20509e+06	1.27455e+06	841640	916497	1.11371e+06	1.00329e+06	197502	7.72607e+06	1.03395e+06	1.01812e+06	1.87292e+06	1.68009e+06	1.80379e+07	5.48983e+06	1.33329e+06	1.15327e+06	6.95054e+06	1.68359e+06	295958	2.97867e+06	2.79074e+06	998543	1.36807e+06
P08571	ENSG00000170458	CD14	7	7	382.01	0.082053	0.344342	1.48858	0.430669	0.0654056	0.269408	1.50518	0.474082	Outcome 1	Outcome 0	Monocyte differentiation antigen CD14 OS=Homo sapiens GN=CD14 PE=1 SV=2	1	3	1.28741e+06	2.30352e+06	1.14072e+06	935042	983680	3.06217e+06	724747	140566	1.14873e+06	904530	673145	478139	502889	2.56975e+06	282614	2.05097e+06	710856	213820	1.12139e+06	1.1707e+06	2.01736e+06	3.71114e+06	2.02535e+06	2.81147e+06	1.37753e+06	5.02636e+06	5.07906e+06	8.63796e+06	2.09705e+06	3.32156e+06	1.43619e+06
P01034	ENSG00000101439	CST3	3	3	277.22	0.955436	0.75362	1.16496	0.0503662	0.925582	0.64355	1.15701	0.0510236	Outcome 0	Outcome 1	Cystatin-C OS=Homo sapiens GN=CST3 PE=1 SV=1	1	3	1.28183e+06	2.6486e+06	1.08187e+07	437911	1.863e+06	846818	1.26738e+06	547516	5.25941e+06	1.45839e+06	889234	176483	707555	2.20463e+06	641029	3.87461e+06	1.05518e+06	1.62535e+06	1.91453e+06	2.60641e+06	1.44756e+06	1.34433e+06	773951	2.73184e+06	317937	2.50799e+06	5.9622e+06	5.19155e+06	1.09212e+06	4.13382e+06	827555
P68431	ENSG00000277775	HIST1H3F	1	1	59.34	0.601108	0.654225	1.01043	0.082703	0.601108	0.565655	1.01043	0.082703	Outcome 0	Outcome 1	Histone H3.1 OS=Homo sapiens GN=HIST1H3A PE=1 SV=2	0	3	1.261e+06	268540	2.23389e+06	2.91984e+06	777820	1.13341e+06	266983	286624	1.73524e+06	364564	347492	234817	1.81671e+07	150333	5.71755e+06	1.6083e+07	1.15649e+06	464880	3.40918e+06	3.5739e+06	1.66829e+06	198115	235293	451450	3.13207e+06	2.02847e+06	991391	3.79167e+06	1.75997e+06	3.2225e+06	1.36172e+06
P08697	ENSG00000276838	SERPINF2	7	7	431.04	0.0435063	0.344342	1.62404	0.549009	0.0389973	0.269408	1.52401	0.568248	Outcome 1	Outcome 0	Alpha-2-antiplasmin OS=Homo sapiens GN=SERPINF2 PE=1 SV=3	1	3	1.24467e+06	1.07014e+06	571199	577118	1.54695e+06	1.21179e+06	1.5371e+06	199194	306681	1.81003e+06	226765	246117	195391	4.11266e+06	351913	1.9879e+06	266147	129395	753660	493003	980298	1.52728e+06	1.28541e+06	751544	110338	447015	1.70948e+06	1.13512e+06	1.60803e+06	2.19305e+06	579990
P00739	ENSG00000261701	HPR	17	4	1241.57	0.36423	0.572485	1.13106	0.151523	0.182017	0.379528	1.20123	0.275306	Outcome 1	Outcome 0	Haptoglobin-related protein OS=Homo sapiens GN=HPR PE=2 SV=2	0	3	1.20098e+06	1.14963e+06	304314	1.26005e+06	853784	791392	520361	1.54593e+06	1.58564e+06	934676	953754	1.70656e+06	1.63181e+06	1.31145e+06	192321	793871	1.11903e+06	887381	1.92112e+06	1.69585e+06	825978	1.69979e+06	405306	971995	368513	959163	879545	888976	945788	1.36237e+06	590098
P0C0L5	ENSG00000224389	C4B	44	3	3084.85	0.332619	0.551565	1.09291	0.166307	0.319086	0.450833	1.10139	0.173252	Outcome 1	Outcome 0	Complement C4-B OS=Homo sapiens GN=C4B PE=1 SV=2	1	3	1.19307e+06	5.43063e+06	1.1221e+06	283929	1.20377e+06	1.83091e+06	1.13098e+06	332046	265061	3.03892e+06	207924	437834	247047	7.33767e+06	245364	2.11289e+06	463723	338393	2.12568e+06	360565	1.53514e+06	2.32464e+06	3.6748e+06	1.18236e+06	473513	1.63537e+06	79157.7	1.39302e+06	920448	2.7763e+06	1.62283e+06
P04114	ENSG00000084674	APOB	43	43	2621.4	0.221358	0.495241	1.23092	0.238341	0.233992	0.42597	1.18358	0.228079	Outcome 1	Outcome 0	Apolipoprotein B-100 OS=Homo sapiens GN=APOB PE=1 SV=2	1	3	1.11058e+06	1.75662e+06	561143	931317	1.22766e+06	1.90171e+06	1.35454e+06	982947	213344	2.07885e+06	515966	569223	529440	1.80062e+06	744643	991343	686093	1.09736e+06	2.23553e+06	541650	916012	3.9531e+06	1.39099e+06	511383	678160	1.06898e+06	849486	516440	634572	1.20345e+06	809028
P01591	ENSG00000132465	JCHAIN	4	4	161.52	0.197589	0.470977	1.2111	0.259667	0.17898	0.379528	1.23862	0.278531	Outcome 1	Outcome 0	Immunoglobulin J chain OS=Homo sapiens GN=JCHAIN PE=1 SV=4	1	3	1.08715e+06	823916	364163	763335	1.10254e+06	936169	1.12677e+06	541442	485874	1.06059e+06	1.05472e+06	609475	1.9229e+06	2.08075e+06	955431	2.3499e+06	1.74825e+06	224067	1.13277e+06	4.34625e+06	694837	1.25225e+06	1.91147e+06	451464	1.27628e+06	2.69949e+06	1.45914e+06	3.37105e+06	2.43258e+06	1.07176e+06	953424
P13796;P13797;Q14651	ENSG00000136167	LCP1	16	16	985.89	0.222401	0.495241	1.08296	0.237468	0.201949	0.397502	1.00853	0.255538	Outcome 1	Outcome 0	Plastin-2 OS=Homo sapiens GN=LCP1 PE=1 SV=6	0	3	1.07634e+06	505434	222552	950444	201338	6.1572e+06	1.50674e+06	4.11864e+06	3.51948e+06	503844	760839	3.08291e+06	2.73056e+06	618863	2.62547e+06	3.19813e+06	1.78608e+06	2.88417e+06	1.18559e+06	1.42752e+06	4.94303e+06	1.4779e+06	836944	557832	1.24609e+07	566292	169943	2.14051e+06	341094	623451	1.01566e+06
O43866	ENSG00000073754	CD5L	5	5	354.16	0.379384	0.578348	1.1256	0.145074	0.421786	0.51139	1.11547	0.128919	Outcome 0	Outcome 1	CD5 antigen-like OS=Homo sapiens GN=CD5L PE=1 SV=1	1	3	1.07281e+06	276497	364097	806544	558910	399451	653309	722791	1.01015e+06	345863	1.41242e+06	1.34597e+06	3.00666e+06	1.63933e+06	2.06731e+06	1.81548e+06	2.36478e+06	1.42735e+06	1.7526e+06	4.03385e+06	972315	1.38928e+06	951189	224987	2.0063e+06	1.17859e+06	221568	392666	1.53051e+06	391703	921630
P36955	ENSG00000132386	SERPINF1	8	8	455.45	0.95311	0.75362	1.07914	0.0504054	0.66875	0.569609	1.00194	0.0717665	Outcome 0	Outcome 1	Pigment epithelium-derived factor OS=Homo sapiens GN=SERPINF1 PE=1 SV=4	1	3	1.06221e+06	1.28706e+06	6.18558e+06	1.38245e+06	533701	793523	887797	699355	2.69228e+06	517529	818161	243805	965033	1.45977e+06	595442	3.21456e+06	1.05703e+06	2.10776e+06	1.34426e+06	1.02787e+06	1.14698e+06	857969	813133	1.01501e+06	219366	1.8148e+06	2.44101e+06	3.73356e+06	813843	2.5872e+06	417000
P01619	ENSG00000239951	IGKV3-20	3	2	219.04	0.192039	0.470977	1.30347	0.265075	0.711191	0.58043	1.23039	0.0662453	Outcome 1	Outcome 0	Ig kappa chain V-III region B6 OS=Homo sapiens PE=1 SV=1	0	3	1.05722e+06	842476	1.26229e+06	566621	915132	729409	1.24988e+06	955163	1.02166e+06	1.0316e+06	1.163e+06	812422	555445	709686	561290	795423	569981	1.08284e+06	1.42424e+06	1.0149e+06	2.95969e+06	1.567e+06	1.50491e+06	638926	665466	2.28623e+06	1.25998e+06	1.13083e+06	2.34797e+06	898455	3.72844e+06
Q71DI3	ENSG00000183598	HIST2H3D	1	1	67.18	0.796233	0.709921	1.34637	0.0578595	0.796233	0.609108	1.34637	0.0578595	Outcome 0	Outcome 1	Histone H3.2 OS=Homo sapiens GN=HIST2H3A PE=1 SV=3	0	3	1.04793e+06	746504	332817	2.05335e+06	1.03271e+06	1.58669e+06	371082	227048	480680	1.06316e+06	113433	468097	1.05076e+07	625391	4.78452e+06	1.15195e+07	185097	380752	2.34453e+07	2.39623e+06	1.75381e+06	182857	515909	1.17344e+06	1.47491e+06	192498	221560	3.61505e+06	1.36685e+06	2.19147e+06	1.33759e+06
P01779;P01770	ENSG00000281962	IGHV3-23	2	1	196.13	0.708151	0.674992	1.07797	0.0666093	0.708151	0.57997	1.07797	0.0666093	Outcome 1	Outcome 0	Ig heavy chain V-III region TUR OS=Homo sapiens PE=1 SV=1	0	3	1.03863e+06	890415	59901	380721	499065	316675	432959	1.96486e+06	625244	1.05393e+06	1.12442e+06	1.08821e+06	881960	2.40034e+06	911078	1.02332e+06	665107	1.32283e+06	3.54018e+06	1.26896e+06	1.51759e+06	972059	1.65235e+06	640726	2.14183e+06	1.84392e+06	3.3585e+06	80024.2	1.23078e+06	451555	878519
P06318	ENSG00000211640	IGLV6-57	1	1	85.74	0.226058	0.495241	1.04548	0.234443	0.226058	0.42597	1.04548	0.234443	Outcome 1	Outcome 0	Ig lambda chain V-VI region WLT OS=Homo sapiens PE=1 SV=1	0	3	1.02127e+06	602579	8841.78	287654	1.31232e+07	2.14775e+06	1.02867e+06	827823	641902	669574	1.01388e+06	189350	1.33058e+06	953999	469514	1.6414e+06	559550	1.14809e+06	382474	1.55262e+06	839526	578542	1.09873e+06	697468	100711	1.59202e+06	2.52426e+06	502999	2.05741e+06	1.75337e+06	1.93787e+06
P01620;P01623;P01622	ENSG00000282402	IGKV3-20	4	1	261.13	0.241802	0.499594	1.44445	0.222063	0.241802	0.42597	1.44445	0.222063	Outcome 1	Outcome 0	Ig kappa chain V-III region SIE OS=Homo sapiens PE=1 SV=1	0	3	968050	994885	267063	776717	597807	458516	2.55909e+06	1.05736e+06	846476	969187	682069	482712	966914	340851	133399	578489	270590	945224	2.98245e+06	1.20466e+06	1.83781e+06	1.13491e+06	2.29221e+06	196431	910506	1.72604e+06	545828	1.35661e+06	4.08318e+06	507600	1.03171e+06
P02760	ENSG00000106927	AMBP	6	6	427.39	0.116933	0.376492	1.32018	0.361486	0.0494183	0.269408	1.41211	0.526108	Outcome 1	Outcome 0	Protein AMBP OS=Homo sapiens GN=AMBP PE=1 SV=1	1	3	921418	1.69511e+06	1.15416e+06	331480	1.14817e+06	201802	967977	247671	269297	2.49693e+06	478881	607582	891865	2.29555e+06	260662	1.34329e+06	160375	313162	484374	815832	524547	723821	2.08318e+06	1.09352e+06	1.57812e+06	1.15681e+06	1.99184e+06	897097	828776	2.71902e+06	277302
P64031	#N/A	#N/A	8	8	631.87	6.43395e-06	0.00174781	2.88038	0.999003	1.58e-05	0.0037027	3.51728	0.99768	Outcome 1	Outcome 0	Elongation factor Tu OS=Streptococcus pneumoniae (strain ATCC BAA-255 / R6) GN=tuf PE=3 SV=1	0	3	919857	546153	265755	878386	1.11746e+06	814544	299718	633967	254685	295239	314599	496021	522216	1.53668e+06	633500	610015	640551	473519	665171	455854	779311	680740	1.00664e+06	2.99216e+06	745805	806338	1.71284e+06	961328	1.911e+06	381255	2.42461e+06
P62979	ENSG00000143947	RPS27A	2	2	110.82	0.774604	0.701417	1.24109	0.0596768	0.774604	0.604305	1.24109	0.0596768	Outcome 1	Outcome 0	Ubiquitin-40S ribosomal protein S27a OS=Homo sapiens GN=RPS27A PE=1 SV=2	0	3	890090	354821	428536	754155	519448	3.83494e+06	1.39559e+06	3.09464e+06	1.02291e+06	521077	934438	1.94195e+06	1.45852e+06	327110	649246	872159	2.24931e+06	1.95923e+06	1.77692e+06	1.80108e+06	2.64337e+06	823344	560920	752374	5.096e+06	674020	458216	1.44495e+06	887457	237887	736828
P02751	ENSG00000115414	FN1	18	18	1064.73	0.513179	0.619589	1.10447	0.101664	0.27947	0.44567	1.23413	0.196096	Outcome 0	Outcome 1	Fibronectin OS=Homo sapiens GN=FN1 PE=1 SV=4	1	3	885259	901706	1.67798e+06	684742	636920	544688	532680	586893	1.53521e+06	1.37799e+06	1.28957e+06	476592	496910	967086	296289	1.18304e+06	889613	880906	1.26549e+06	3.26683e+06	1.40121e+06	749171	554508	2.12842e+06	1.31231e+06	711093	1.36722e+06	1.16734e+06	1.53782e+06	2.52163e+06	865212
P19823	ENSG00000151655	ITIH2	8	8	480.04	0.603958	0.654225	1.08007	0.082184	0.306212	0.447536	1.14663	0.180243	Outcome 1	Outcome 0	Inter-alpha-trypsin inhibitor heavy chain H2 OS=Homo sapiens GN=ITIH2 PE=1 SV=2	1	3	885247	1.97733e+06	442688	728374	1.59517e+06	162553	1.51792e+06	722145	910070	3.99445e+06	691295	245497	230944	915286	216285	1.79592e+06	429912	273766	3.11201e+06	1.46713e+06	600762	1.58067e+06	1.799e+06	1.40642e+06	363691	685480	1.41794e+06	182272	222201	3.99437e+06	469454
P60174	ENSG00000111669	TPI1	8	8	607.25	0.142306	0.407284	1.17779	0.322993	0.264339	0.429976	1.04988	0.205965	Outcome 0	Outcome 1	Triosephosphate isomerase OS=Homo sapiens GN=TPI1 PE=1 SV=3	1	3	871219	211712	437778	463470	1.23595e+06	4.18321e+06	970866	1.88079e+06	2.67185e+06	257682	735022	1.08933e+06	1.2969e+06	129665	1.52256e+06	2.34982e+06	1.54323e+06	3.34605e+06	830457	879613	2.87689e+06	920564	325679	390371	3.46273e+06	228437	184064	219991	436220	242562	1.00691e+06
P08311	ENSG00000100448	CTSG	4	4	189.28	0.00422046	0.143314	1.83228	0.853722	0.00434468	0.14538	1.82026	0.851306	Outcome 0	Outcome 1	Cathepsin G OS=Homo sapiens GN=CTSG PE=1 SV=2	0	3	829121	507385	341221	1.11445e+06	932263	807806	1.04224e+06	2.50076e+06	3.46477e+06	850435	807481	1.74311e+06	2.21139e+06	274017	1.19094e+06	2.11841e+06	1.36517e+06	5.91214e+06	2.08956e+06	1.72459e+06	2.28122e+06	1.11003e+06	714881	1.23686e+06	677192	558505	486618	1.06452e+06	1.54144e+06	549711	1.45149e+06
P09211	ENSG00000084207	GSTP1	2	2	77.49	0.484166	0.602646	1.15109	0.109357	0.484166	0.529293	1.15109	0.109357	Outcome 1	Outcome 0	Glutathione S-transferase P OS=Homo sapiens GN=GSTP1 PE=1 SV=2	1	3	820178	374556	162928	409136	316781	2.38067e+06	1.11755e+06	934519	1.15975e+06	404306	1.34973e+06	473150	403193	177893	468938	1.8075e+06	1.02104e+06	689849	1.73218e+06	912797	4.6373e+06	1.04386e+06	314504	327815	2.40642e+06	665438	92309.2	1.17072e+06	413045	524544	950893
O75594	ENSG00000008438	PGLYRP1	2	2	148.87	0.308896	0.551565	1.03799	0.178752	0.308896	0.447536	1.03799	0.178752	Outcome 0	Outcome 1	Peptidoglycan recognition protein 1 OS=Homo sapiens GN=PGLYRP1 PE=1 SV=1	1	3	814593	139906	174221	1.31736e+06	964131	1.84152e+06	499099	2.3174e+06	2.34734e+06	442326	764774	1.06382e+06	820264	547740	298463	1.10509e+06	1.26887e+06	805783	1.56832e+06	2.2917e+06	1.23298e+06	691205	88706.9	25133.7	3.19363e+06	72988.6	142552	240188	808922	167210	696982
P04208	ENSG00000211648	IGLV1-47	2	1	159.95	0.324742	0.551565	1.46399	0.170301	0.0555438	0.269408	1.85418	0.504675	Outcome 1	Outcome 0	Ig lambda chain V-I region WAH OS=Homo sapiens PE=1 SV=1	0	3	769108	629751	683353	932366	1.66174e+06	795588	416973	742629	388895	470055	523337	326194	505238	490100	339137	869339	655728	1.22254e+06	731963	628737	962591	521374	1.26414e+06	532538	603582	2.05218e+06	1.41869e+06	1.88881e+06	1.25377e+06	333780	290679
P10909	ENSG00000120885	CLU	8	8	358.66	0.316089	0.551565	1.11306	0.174845	0.301526	0.447536	1.01142	0.182886	Outcome 1	Outcome 0	Clusterin OS=Homo sapiens GN=CLU PE=1 SV=1	1	3	760260	1.33296e+06	2.99884e+06	554352	1.65949e+06	1.53802e+06	643765	410638	882038	516054	193876	141040	144865	1.68518e+06	105328	1.77257e+06	173421	277510	732981	757447	765916	899514	1.37434e+06	875163	753151	74220.9	2.16297e+06	1.1466e+06	754080	1.4501e+06	592731
P01031	ENSG00000106804	C5	5	5	356.01	0.300538	0.551565	1.25897	0.18345	0.205054	0.400251	1.25371	0.25266	Outcome 1	Outcome 0	Complement C5 OS=Homo sapiens GN=C5 PE=1 SV=4	1	3	739697	679261	330366	212982	797480	776314	682334	272896	381759	815470	406138	241805	226700	1.47947e+06	114085	1.00332e+06	218429	255286	1.42924e+06	355177	935682	898065	474183	265115	390175	705839	788468	762767	801828	768498	388547
P08185	ENSG00000277405	SERPINA6	3	3	176.96	0.0802721	0.344342	1.34189	0.43491	0.0964171	0.296395	1.32194	0.399292	Outcome 0	Outcome 1	Corticosteroid-binding globulin OS=Homo sapiens GN=SERPINA6 PE=1 SV=1	1	3	732236	1.03748e+06	171536	935881	652097	714522	597788	3.43831e+06	558249	479544	1.47555e+06	1.1358e+06	1.01453e+06	822704	827110	1.12145e+06	1.00844e+06	1.03709e+06	995545	1.07582e+06	536008	746530	1.02081e+06	365994	277788	147276	678260	877195	395669	1.57342e+06	429007
P01880	ENSG00000211898	IGHD	4	4	211.2	0.167358	0.438025	1.59336	0.291462	0.168239	0.368289	1.59439	0.290447	Outcome 1	Outcome 0	Ig delta chain C region OS=Homo sapiens GN=IGHD PE=1 SV=2	1	3	723940	3.53352e+06	463106	1.74571e+06	126818	374293	344184	992605	1.07164e+06	285070	1.6164e+06	797336	567060	530743	274873	527399	660463	588937	305574	2.23919e+06	389035	1.16862e+06	141575	708722	882757	629811	1.13702e+06	1.27944e+06	996139	1.38354e+06	853555
P49913	ENSG00000164047	CAMP	4	4	259.67	0.0138549	0.268839	1.56978	0.727114	0.0156833	0.216789	1.58093	0.710461	Outcome 0	Outcome 1	Cathelicidin antimicrobial peptide OS=Homo sapiens GN=CAMP PE=1 SV=1	0	3	700250	129575	123754	3.44494e+06	1.33631e+06	346325	853736	3.53464e+06	3.63351e+06	700844	2.371e+06	4.37564e+06	1.6607e+06	48441.1	2.5564e+06	699656	328334	3.38522e+06	2.70383e+06	6.57589e+06	1.92347e+06	543426	40120.3	137057	5.36438e+06	45412.7	73467.9	54554.2	11544.9	62374.9	1.6754e+06
Q8NHQ9	ENSG00000111364	DDX55	1	1	39.73	0.508372	0.617216	1.58392	0.102883	0.508372	0.538809	1.58392	0.102883	Outcome 0	Outcome 1	ATP-dependent RNA helicase DDX55 OS=Homo sapiens GN=DDX55 PE=1 SV=3	0	3	695156	38619.2	811408	1.14321e+06	125729	765930	19662.1	1.62727e+07	7.60565e+06	354208	1.30192e+07	2.19439e+07	4.47281e+06	13665.6	6.53963e+06	7064.84	8.20395e+06	3.06423e+07	276837	2.33833e+06	27669.1	624382	56453.5	1.35757e+06	5.89245e+06	935719	2053.9	1.55202e+06	362303	928615	341413
P22792	ENSG00000178772	CPN2	1	1	45.54	0.117803	0.376492	1.63875	0.360031	0.117803	0.306592	1.63875	0.360031	Outcome 1	Outcome 0	Carboxypeptidase N subunit 2 OS=Homo sapiens GN=CPN2 PE=1 SV=3	1	3	668564	604294	409595	97148.6	1.18682e+06	1.03534e+06	662824	86737.4	106621	780008	234416	101970	187328	1.88789e+06	69268.8	907230	72319.1	35671	1.37559e+06	377704	531769	1.02368e+06	568649	740431	71122.3	298344	763928	951848	958430	1.47228e+06	86177
P24158	ENSG00000196415	PRTN3	2	2	90.48	0.195074	0.470977	1.36617	0.262095	0.195074	0.390535	1.36617	0.262095	Outcome 0	Outcome 1	Myeloblastin OS=Homo sapiens GN=PRTN3 PE=1 SV=3	0	3	668045	733430	186933	66996.5	473331	651381	767012	906885	1.17602e+06	971403	258498	1.51306e+06	2.25296e+06	578155	574051	803955	1.12133e+06	1.75158e+06	1.42635e+06	1.4717e+06	1.24568e+06	693458	589215	1.12742e+06	1.18236e+06	177293	380638	257143	239054	551418	158049
P0DJI9	ENSG00000134339	SAA2	7	2	395.73	0.728396	0.682318	1.72524	0.0642724	0.637216	0.565655	2.03915	0.076517	Outcome 1	Outcome 0	Serum amyloid A-2 protein OS=Homo sapiens GN=SAA2 PE=1 SV=1	1	3	658843	75033.3	89752.5	2.01923e+06	4.16399e+06	408896	1.24525e+06	422350	1.3184e+06	177347	2.38275e+06	525968	872377	3.46144e+06	59318.4	3.89984e+06	596932	349265	912614	620493	1.84325e+06	2.1806e+06	69757.5	220225	384305	56518.4	342471	586090	244330	53988.5	274566
P29401	ENSG00000163931	TKT	11	11	837.15	0.0546132	0.344342	1.32976	0.507798	0.0476909	0.269408	1.19313	0.532554	Outcome 0	Outcome 1	Transketolase OS=Homo sapiens GN=TKT PE=1 SV=3	1	3	655638	314260	209444	775558	89101.9	2.49052e+06	1.20539e+06	4.68429e+06	2.18037e+06	278954	485764	2.20711e+06	2.3637e+06	285451	2.95079e+06	1.98552e+06	1.20763e+06	3.97997e+06	1.90815e+06	659143	3.00027e+06	652396	243247	541475	3.63547e+06	247664	174679	1.19221e+06	232106	472833	1.00548e+06
Q96LP2	ENSG00000153347	FAM81B	1	1	29.88	0.799676	0.709921	1.39623	0.0575891	0.799676	0.609108	1.39623	0.0575891	Outcome 1	Outcome 0	Protein FAM81B OS=Homo sapiens GN=FAM81B PE=1 SV=3	0	3	651428	48370.5	7.05107e+06	986874	331626	649137	333175	6.0579e+06	3.22862e+06	207133	3.84863e+06	3.3372e+06	3.21753e+06	158791	3.48164e+06	116785	6.38709e+06	6.83082e+06	552269	827084	176664	563241	862547	15875	3.35314e+06	709344	8.4361e+06	234253	653719	193000	380500
P08670;P17661;P07196	ENSG00000026025	VIM	10	10	673.63	0.304499	0.551565	1.53159	0.181202	0.2544	0.42597	1.47153	0.212846	Outcome 1	Outcome 0	Vimentin OS=Homo sapiens GN=VIM PE=1 SV=4	0	3	635714	373168	258866	846893	515981	1.76514e+06	431096	899754	1.2312e+06	261937	1.03204e+06	138514	120056	231018	416875	988348	2.13103e+06	683925	608074	1.12756e+06	1.69506e+06	359173	588339	623970	382508	364303	219883	302466	902464	254569	1.05742e+06
P18428	ENSG00000129988	LBP	5	5	238.07	0.140412	0.407284	1.85449	0.325612	0.109884	0.298645	1.9058	0.373688	Outcome 1	Outcome 0	Lipopolysaccharide-binding protein OS=Homo sapiens GN=LBP PE=1 SV=3	1	3	611487	179396	319936	1.13243e+06	466742	673332	316262	314721	607221	104832	1.08117e+06	294167	744213	559433	46999.5	882878	374303	227130	488651	782796	853724	1.14474e+06	316880	346255	615753	133146	253734	212822	1.27553e+06	329824	250226
P62937;A0A075B759	ENSG00000196262	PPIA	4	4	246.48	0.315262	0.551565	1.04349	0.175288	0.290692	0.445827	1.03516	0.189211	Outcome 1	Outcome 0	Peptidyl-prolyl cis-trans isomerase A OS=Homo sapiens GN=PPIA PE=1 SV=2	0	3	602239	192862	296462	396593	69381.6	3.32355e+06	853754	2.13738e+06	1.76727e+06	261755	555959	1.38538e+06	1.23656e+06	232146	706638	1.91151e+06	658217	1.80595e+06	805310	605952	2.76196e+06	837562	200790	263308	4.90325e+06	821010	102672	803285	206355	327231	598525
P01610	ENSG00000281978	IGKV1-17	2	1	196.1	0.561766	0.637633	1.6274	0.0904483	0.561766	0.564465	1.6274	0.0904483	Outcome 1	Outcome 0	Ig kappa chain V-I region WEA OS=Homo sapiens PE=1 SV=1	0	3	563971	483278	570.262	204875	909064	84681.8	1.00723e+06	655763	263281	418509	623331	394778	198199	299608	215696	972871	597983	276810	460849	808088	751345	785303	1.66014e+06	813827	537305	1629.68	15059.2	90106.8	98276.9	1.02311e+06	6.62015e+06
P01715	ENSG00000211673	IGLV3-1	1	1	26.96	0.183095	0.464847	1.54199	0.274175	0.183095	0.379528	1.54199	0.274175	Outcome 1	Outcome 0	Ig lambda chain V-IV region Bau OS=Homo sapiens PE=1 SV=1	0	3	532689	461605	499348	6.47713e+06	2.0191e+06	222851	412567	437120	113304	311514	219280	370425	3.12113e+06	674641	1.50668e+06	408742	465536	211194	634379	255192	472708	235010	936681	411044	1.47953e+06	1.66801e+06	709387	1.01024e+07	1.47069e+06	603974	737061
P12814;P35609;Q08043	ENSG00000072110	ACTN1	12	6	691.06	0.899852	0.749586	1.10991	0.0518592	0.613788	0.565655	1.20678	0.0804351	Outcome 1	Outcome 0	Alpha-actinin-1 OS=Homo sapiens GN=ACTN1 PE=1 SV=2	0	3	528648	178565	605823	516971	159643	2.2977e+06	500371	1.1524e+06	1.15081e+06	105815	264194	651733	560445	283028	576245	1.04525e+06	440552	881948	443192	509452	1.79359e+06	525435	360026	776184	939587	811253	531862	1.1877e+06	360298	918935	622943
P19827	ENSG00000055957	ITIH1	5	5	300.79	0.738437	0.686987	1.00365	0.0631881	0.563297	0.564465	1.04953	0.0901257	Outcome 0	Outcome 1	Inter-alpha-trypsin inhibitor heavy chain H1 OS=Homo sapiens GN=ITIH1 PE=1 SV=3	1	3	517368	982161	201638	1.60776e+06	863916	300917	529528	208454	351802	1.65659e+06	347761	138846	190638	530931	171207	1.15256e+06	208791	529764	2.25594e+06	732320	445814	1.18692e+06	1.26253e+06	684478	212626	262779	1.47947e+06	279366	139516	1.55312e+06	360051
P01597	ENSG00000242371	IGKV1-39	3	1	317.21	0.593309	0.654225	1.31285	0.0841513	0.593309	0.565655	1.31285	0.0841513	Outcome 1	Outcome 0	Ig kappa chain V-I region DEE OS=Homo sapiens PE=1 SV=1	0	3	509641	717855	109118	96116.7	384286	17604.4	387623	1.9052e+06	318935	168773	650305	922101	384204	187899	559497	370115	396781	1.81142e+06	403602	1.18103e+06	599381	1.45871e+06	498973	204067	246089	204117	177966	55241.4	61983.6	34642.5	7815.84
P01824	ENSG00000282579	IGHV4-39	1	1	38.57	0.319505	0.551565	1.33905	0.173031	0.319505	0.450833	1.33905	0.173031	Outcome 1	Outcome 0	Ig heavy chain V-II region WAH OS=Homo sapiens PE=1 SV=1	0	3	483632	690407	285581	88935.3	249760	185501	600916	452532	625483	534429	453689	522505	266945	384826	197504	266651	575835	801960	1.00504e+06	685306	862562	519254	764730	236274	2.23657e+06	3.2948e+06	479407	415594	333882	410501	129415
P07360	ENSG00000176919	C8G	1	1	84.11	0.145429	0.407284	1.24639	0.318753	0.145429	0.351176	1.24639	0.318753	Outcome 1	Outcome 0	Complement component C8 gamma chain OS=Homo sapiens GN=C8G PE=1 SV=3	1	3	465585	389229	243813	1.16855e+06	1.42689e+06	305409	234229	52167.8	130782	192074	183004	130088	99902.5	726753	62547.6	631495	718367	449908	821889	741428	556595	468362	311870	635074	185768	410881	244059	499824	620144	686668	170624
P10451	ENSG00000118785	SPP1	4	4	152.52	0.266803	0.521427	1.14834	0.20431	0.255173	0.42597	1.1365	0.212298	Outcome 1	Outcome 0	Osteopontin OS=Homo sapiens GN=SPP1 PE=1 SV=1	1	3	463861	1.04611e+06	6.83885e+06	670782	697998	3.13581e+06	231988	290670	219291	142397	149326	394495	113791	665151	72726.9	808301	341559	726709	445258	222899	228729	69491.1	278758	565804	566901	1.07642e+06	5.05516e+06	2.43488e+06	1.86368e+06	1.64819e+06	832199
P43652	ENSG00000079557	AFM	8	8	326.68	0.206187	0.48329	1.19422	0.251623	0.274536	0.443484	1.13972	0.199237	Outcome 0	Outcome 1	Afamin OS=Homo sapiens GN=AFM PE=1 SV=1	1	3	462737	295369	444543	385864	651418	153113	375014	699989	921084	541045	822438	478337	715563	458359	256569	679052	481078	844716	568094	1.32438e+06	288945	354789	483989	399595	891970	306474	252990	281319	384713	926053	411659
P27169	ENSG00000005421	PON1	5	5	248.8	0.718577	0.682318	1.05882	0.0653802	0.535451	0.554355	1.04248	0.0962793	Outcome 0	Outcome 1	Serum paraoxonase/arylesterase 1 OS=Homo sapiens GN=PON1 PE=1 SV=3	1	3	461426	883886	184453	129734	1.22922e+06	112016	658764	58570.3	1.05616e+06	1.56058e+06	119156	42998.2	145680	562948	102543	912258	73710.7	52435.8	1.55691e+06	676181	476262	1.79095e+06	759988	406643	141508	55288.8	353653	120358	258070	984382	142913
P02745	ENSG00000173372	C1QA	2	2	70.8	0.0477788	0.344342	1.62547	0.532222	0.0477788	0.269408	1.62547	0.532222	Outcome 1	Outcome 0	Complement C1q subcomponent subunit A OS=Homo sapiens GN=C1QA PE=1 SV=2	1	3	456862	1.12942e+06	1.48405e+06	420043	229485	438246	366381	105421	660395	229376	463587	154275	344345	777732	81504.9	450137	505098	249290	480455	796663	178709	267190	1.00672e+06	1.73928e+06	161467	1.64921e+06	2.15068e+06	1.44839e+06	437599	1.27386e+06	351855
P05452	ENSG00000163815	CLEC3B	1	1	98.3	0.425345	0.591283	1.23293	0.127678	0.425345	0.51139	1.23293	0.127678	Outcome 1	Outcome 0	Tetranectin OS=Homo sapiens GN=CLEC3B PE=1 SV=3	1	3	448815	494426	1.67028e+06	174819	516921	236127	277212	281754	433990	618594	224178	443322	405463	763773	187563	628854	349838	290190	443270	519074	451115	360672	426555	702815	351808	696870	933829	1.32293e+06	649092	584572	190831
P01699	ENSG00000211651	IGLV1-44	1	1	27.91	0.165999	0.438025	1.10204	0.293038	0.165999	0.368289	1.10204	0.293038	Outcome 0	Outcome 1	Ig lambda chain V-I region VOR OS=Homo sapiens PE=1 SV=1	0	3	430859	350196	986207	397091	338334	364629	2.17279e+06	154068	79819.5	474291	33242.3	72501.6	111978	589820	126018	291976	32978.7	148147	8.66538e+06	308258	1.33549e+06	880606	691105	772463	464981	2.09168e+06	164881	612346	557524	306834	184780
Q9NP58	ENSG00000115657	ABCB6	1	0	43.89									---	---	ATP-binding cassette sub-family B member 6, mitochondrial OS=Homo sapiens GN=ABCB6 PE=1 SV=1	0	meian infec CSF	452838
P61916	ENSG00000119655	NPC2	1	1	32.06	0.6723	0.668987	1.46059	0.0712674	0.6723	0.570557	1.46059	0.0712674	Outcome 0	Outcome 1	Epididymal secretory protein E1 OS=Homo sapiens GN=NPC2 PE=1 SV=1	1	3	426280	62568.1	3068.12	29969.9	243778	107750	182116	1.00206e+06	3.09184e+06	82082.9	778639	1.04958e+06	999646	354403	598904	1.25121e+06	4.79685e+06	1.6285e+06	283152	2.19842e+06	802922	169076	28175.3	73940.4	109281	162608	15063.5	925306	188853	40006.8	155209
P04211	ENSG00000211652	IGLV7-43	2	2	67.87	0.144054	0.407284	1.07234	0.320608	0.144054	0.351176	1.07234	0.320608	Outcome 0	Outcome 1	Ig lambda chain V region 4A OS=Homo sapiens PE=4 SV=1	0	3	422078	361605	6.66758e+06	342880	240960	237817	377267	726653	216965	198737	568948	238819	258330	125083	223942	776965	284560	894950	339803	740016	305943	504872	1.13751e+06	436210	390730	993626	989586	1.8561e+06	588484	607945	216341
P02747	ENSG00000159189	C1QC	2	2	75.86	0.0753333	0.344342	1.4419	0.44714	0.0753333	0.272888	1.4419	0.44714	Outcome 1	Outcome 0	Complement C1q subcomponent subunit C OS=Homo sapiens GN=C1QC PE=1 SV=3	1	3	397722	699153	1.74158e+06	450712	203553	377405	244886	170415	596565	207885	448408	98078.8	286925	547108	29212.2	204453	217642	75153.2	540064	841884	173361	330332	686554	546908	83471.4	1.93217e+06	1.75909e+06	1.53673e+06	388286	1.15856e+06	457285
Q96PD5	ENSG00000161031	PGLYRP2	1	1	64.55	0.696657	0.674992	1.05659	0.0680286	0.696657	0.57865	1.05659	0.0680286	Outcome 0	Outcome 1	N-acetylmuramoyl-L-alanine amidase OS=Homo sapiens GN=PGLYRP2 PE=1 SV=1	1	3	382617	494947	28952.8	10826.2	506267	111389	471213	400113	747823	691972	416465	59937.7	342112	306121	391230	502223	272165	456047	745483	1.06756e+06	417578	369996	791346	217272	4101.27	45978.5	650174	19688.2	129571	153284	64863.3
P06727	ENSG00000110244	APOA4	7	7	376.73	0.124738	0.38949	1.35689	0.348805	0.0983715	0.296395	1.41024	0.395369	Outcome 1	Outcome 0	Apolipoprotein A-IV OS=Homo sapiens GN=APOA4 PE=1 SV=3	1	3	364945	535752	858537	273324	550138	243885	377096	171637	656751	653101	243701	116189	96302.6	687726	251118	263022	196205	200083	211457	1.25222e+06	346093	324314	827840	716916	345581	1.06994e+06	793005	594329	680967	491722	271028
P06744	ENSG00000105220	GPI	7	7	515.12	0.471411	0.600468	1.46214	0.113002	0.567625	0.564465	1.09311	0.0892235	Outcome 0	Outcome 1	Glucose-6-phosphate isomerase OS=Homo sapiens GN=GPI PE=1 SV=4	1	3	361765	167748	402704	284207	46176.7	5.4294e+06	1.97727e+06	1.04054e+06	869157	53679.6	62579.8	351752	528584	29222	281063	891199	362316	580706	393600	180791	2.44612e+06	363784	427255	371732	1.93559e+06	373421	211634	2.13611e+06	86756.7	355728	558742
Q06033	ENSG00000162267	ITIH3	3	3	202.76	0.0347833	0.344342	1.80293	0.587908	0.0348071	0.269408	1.79443	0.587792	Outcome 1	Outcome 0	Inter-alpha-trypsin inhibitor heavy chain H3 OS=Homo sapiens GN=ITIH3 PE=1 SV=2	1	3	361396	353868	135316	306726	571981	175308	266074	99413.4	95558.4	515083	413559	81927.7	216223	1.12042e+06	104527	419443	362090	114459	600860	98449.3	174865	198262	199337	100793	237643	656182	1.10679e+06	272426	559991	474131	168270
P23142	ENSG00000077942	FBLN1	5	5	403.18	0.707535	0.674992	1.30031	0.0666836	0.686086	0.577518	1.26919	0.0693951	Outcome 1	Outcome 0	Fibulin-1 OS=Homo sapiens GN=FBLN1 PE=1 SV=4	1	3	359974	734616	1.48939e+06	638054	431699	283979	258089	376011	1.24842e+06	209012	183533	295428	183479	758913	240478	1.41851e+06	316390	710411	569165	1.75254e+06	335247	290402	171679	438134	4.34125e+06	2.81172e+06	2.64372e+06	1.89133e+06	367750	1.06528e+06	283875
Q5JRA6	ENSG00000154305	MIA3	1	1	32.66	0.167693	0.438025	1.52328	0.291075	0.167693	0.368289	1.52328	0.291075	Outcome 1	Outcome 0	Melanoma inhibitory activity protein 3 OS=Homo sapiens GN=MIA3 PE=1 SV=1	1	3	359790	238813	361798	315444	418858	120941	267102	977833	19727.1	276224	269215	602838	345499	357782	77711.1	383602	109736	391269	302963	1.06321e+06	181893	414736	1.29551e+06	949710	367609	1.62124e+06	339338	313793	1.16435e+06	291034	354906
P63104	ENSG00000164924	YWHAZ	5	5	357.07	0.594059	0.654225	1.18392	0.0840103	0.571137	0.564465	1.19787	0.0885017	Outcome 0	Outcome 1	14-3-3 protein zeta/delta OS=Homo sapiens GN=YWHAZ PE=1 SV=1	1	3	357282	103387	190044	366119	28904.8	1.03938e+06	447261	792845	991670	133918	348446	526876	420243	94379.4	920329	1.18674e+06	299745	463176	158851	175559	1.99221e+06	591783	276613	513583	1.0091e+06	99616.1	194677	300692	50181.9	711295	109745
P37837	ENSG00000177156	TALDO1	5	5	278.12	0.1062	0.364275	1.16173	0.380376	0.124149	0.316082	1.19102	0.349734	Outcome 1	Outcome 0	Transaldolase OS=Homo sapiens GN=TALDO1 PE=1 SV=2	1	3	349087	228269	2.59182e+06	744115	50276.6	2.09323e+06	415392	1.1534e+06	914199	83473.7	370095	849895	830588	168312	618205	766333	503335	718611	328079	180504	1.55291e+06	314087	102901	85084.5	4.54167e+06	1.86418e+06	134041	1.53126e+06	72504.6	171430	390304
P02753	ENSG00000138207.12	RBP4	3	3	230.9	0.834921	0.723174	1.18691	0.0551094	0.827622	0.612488	1.21605	0.0555804	Outcome 1	Outcome 0	Retinol-binding protein 4 OS=Homo sapiens GN=RBP4 PE=1 SV=3	1	3	343364	645157	688482	286814	484445	352641	212767	610371	606490	370246	126192	112461	67268.7	289305	639185	307037	187436	1.11798e+06	484778	370979	323199	251679	1.00578e+06	2.66998e+06	235595	432406	504237	395483	190106	617440	431099
Q9Y6R7	ENSG00000281123	FCGBP	12	12	844.14	0.460123	0.600468	1.29199	0.116372	0.388462	0.505501	1.30496	0.141391	Outcome 0	Outcome 1	IgGFc-binding protein OS=Homo sapiens GN=FCGBP PE=1 SV=3	1	3	326561	657541	848424	198619	338294	486474	165067	108713	4.56552e+06	201778	63437.2	139317	157536	3.99147e+06	100901	937958	472547	191378	108440	314828	158718	214795	109228	469170	104160	1.12232e+06	742834	2.99944e+06	287149	1.7398e+06	395501
Q01518	ENSG00000131236	CAP1	5	5	206.45	0.902302	0.749586	1.33349	0.0517688	0.992179	0.660226	1.37796	0.0500112	Outcome 1	Outcome 0	Adenylyl cyclase-associated protein 1 OS=Homo sapiens GN=CAP1 PE=1 SV=5	1	3	324569	72663	40046.4	228040	204173	1.14052e+06	232941	883099	979714	138595	334980	382805	491289	89477.4	524031	781968	535582	674083	411214	264300	1.19508e+06	318701	89562.5	387359	3.54762e+06	198297	176452	160973	236923	109513	285943
P02746	ENSG00000173369	C1QB	2	2	144.73	0.985108	0.767235	1.04212	0.0500408	0.985108	0.660226	1.04212	0.0500408	Outcome 1	Outcome 0	Complement C1q subcomponent subunit B OS=Homo sapiens GN=C1QB PE=1 SV=3	1	3	323493	1.35925e+06	696790	72192.6	322313	148635	436936	21963.2	627661	212470	366137	65908.7	86538.8	806561	63823.6	360666	68893.8	92510.1	582501	469368	232676	314298	820462	367204	397415	22323	293830	1.81909e+06	52697.9	194849	16187.8
Q9UBP4	ENSG00000050165	DKK3	6	6	298.92	0.602178	0.654225	1.03659	0.0825075	0.860167	0.623772	1.04266	0.0536475	Outcome 1	Outcome 0	Dickkopf-related protein 3 OS=Homo sapiens GN=DKK3 PE=1 SV=2	1	3	319697	575356	7.75526e+06	214787	452169	136156	198718	229628	426345	334279	419728	201829	101189	333896	333004	741631	208444	168372	100566	395716	129814	368969	112585	1.37747e+06	314700	1.42437e+06	7.54631e+06	679870	247515	651805	125707
P06733;P13929	ENSG00000074800	ENO1	8	5	570.58	0.248275	0.499594	1.5224	0.217254	0.256817	0.42597	1.47812	0.211142	Outcome 0	Outcome 1	Alpha-enolase OS=Homo sapiens GN=ENO1 PE=1 SV=2	0	3	313907	254165	145236	151058	138068	2.94772e+06	1.02919e+06	317661	1.13649e+06	237080	125339	338508	433787	72332.2	640934	2.26403e+06	141646	303946	705683	646429	3.97155e+06	972972	173562	224798	153772	393880	89732.2	1.0697e+06	150305	121939	674521
P62158;P27482	ENSG00000198668	CALM1	2	2	125.73	0.448959	0.600468	1.44715	0.119844	0.448959	0.519576	1.44715	0.119844	Outcome 1	Outcome 0	Calmodulin OS=Homo sapiens GN=CALM1 PE=1 SV=2	0	3	310188	65576.9	57256.4	34254.2	148402	2.12988e+06	398877	1.66607e+06	694320	64025.9	246608	500287	815303	346902	1.19591e+06	509752	392605	815542	601124	301577	1.0577e+06	318799	149340	329759	4.67777e+06	108064	25765.6	531611	281585	158682	272701
P13671	ENSG00000039537	C6	3	3	241.12	0.197588	0.470977	1.40025	0.259667	0.197588	0.392214	1.40025	0.259667	Outcome 1	Outcome 0	Complement component C6 OS=Homo sapiens GN=C6 PE=1 SV=3	1	3	304891	367841	194824	174054	324103	378163	236825	198776	198857	383984	110213	250244	146940	1.07274e+06	804592	637209	56624.1	290629	327337	244764	245447	647745	249125	80567.6	178960	480318	414916	279893	388861	729672	271972
P04206	ENSG00000282402	IGKV3-20	3	1	229.38	0.563644	0.637633	2.23618	0.0900529	0.563644	0.564465	2.23618	0.0900529	Outcome 1	Outcome 0	Ig kappa chain V-III region GOL OS=Homo sapiens PE=1 SV=1	0	3	304405	1.55489e+06	10796.1	27705.8	185296	68508.3	789028	114390	92007.2	264492	174570	89039.4	159019	118221	845333	193370	1.00231e+06	143810	477772	23353.8	826269	332524	791378	194364	881838	0	11534.5	462334	319944	209744	4.74028e+06
P04083	ENSG00000135046	ANXA1	5	5	265.95	0.0159707	0.289235	1.91089	0.707965	0.0192914	0.216789	1.89741	0.681157	Outcome 0	Outcome 1	Annexin A1 OS=Homo sapiens GN=ANXA1 PE=1 SV=2	1	3	285637	282841	477562	396082	218618	176889	280831	1.77971e+06	4.36064e+06	337066	971855	1.40735e+06	493875	99604.3	685405	720073	323291	1.30043e+06	631658	371236	263107	240228	182904	193104	268610	301581	487768	124627	184681	289237	68699.2
P23528;Q9Y281	ENSG00000172757	CFL1	4	4	217.76	0.626875	0.654426	1.65435	0.0782041	0.691755	0.57865	1.73511	0.0686549	Outcome 0	Outcome 1	Cofilin-1 OS=Homo sapiens GN=CFL1 PE=1 SV=3	0	3	284956	87934.1	538386	218502	197878	4.96566e+06	1.12409e+06	99411.5	181512	200397	42440	187422	77899.7	245417	164283	2.1673e+06	34492.7	212452	313641	165060	2.11779e+06	745359	307477	396198	135909	225396	267171	1.25517e+06	267121	251862	430136
P14174	ENSG00000276701	MIF	1	1	66.06	0.300992	0.551565	1.04792	0.18319	0.300992	0.447536	1.04792	0.18319	Outcome 1	Outcome 0	Macrophage migration inhibitory factor OS=Homo sapiens GN=MIF PE=1 SV=4	1	3	276181	78054	232228	274930	206565	1.65445e+06	344826	959618	510526	288001	160743	183236	551507	247761	360226	606848	178291	434008	367823	177819	1.25565e+06	797893	101048	140514	1.62808e+06	156493	54508.3	487060	105075	42669.4	169252
P10412;P22492	ENSG00000187475	HIST1H1T	2	2	96.98	0.0705946	0.344342	2.94007	0.459577	0.0705946	0.272888	2.94007	0.459577	Outcome 0	Outcome 1	Histone H1.4 OS=Homo sapiens GN=HIST1H1E PE=1 SV=2	0	3	273938	199297	601738	323417	712162	1.24122e+07	1.49944e+06	276225	494211	233034	152628	128458	218017	510009	154431	2.55864e+06	247684	259984	419024	330089	3.6628e+06	1.2215e+06	129938	1.07117e+06	240920	271484	175959	2.2163e+06	312063	397125	896710
P06681	ENSG00000226560	C2	5	5	258.66	0.0788763	0.344342	1.40381	0.438295	0.0768924	0.272888	1.44909	0.443202	Outcome 1	Outcome 0	Complement C2 OS=Homo sapiens GN=C2 PE=1 SV=2	1	3	268216	219662	218237	256710	320088	215408	154612	285763	329625	103150	259026	369305	112974	349003	40909.1	375480	190500	181731	240975	522585	213061	257410	298498	187117	273764	83894.5	298372	503992	277402	892384	156273
P05546	ENSG00000099937	SERPIND1	3	3	159.3	0.305611	0.551565	1.11354	0.180579	0.230727	0.42597	1.15443	0.230666	Outcome 0	Outcome 1	Heparin cofactor 2 OS=Homo sapiens GN=SERPIND1 PE=1 SV=3	1	3	262619	559650	370433	404701	175717	240188	304064	284169	374954	325983	159682	227571	238099	271485	115018	361321	151834	130569	682943	328449	211167	454601	386055	345051	65567.2	552602	252319	180423	138950	749170	179452
P12724	ENSG00000169397	RNASE3	1	1	66.41	0.286139	0.547402	2.33533	0.191962	0.286139	0.445827	2.33533	0.191962	Outcome 0	Outcome 1	Eosinophil cationic protein OS=Homo sapiens GN=RNASE3 PE=1 SV=2	1	3	261768	338581	88128.1	265007	258529	1.76238e+06	1.23198e+06	154359	251307	287394	44561.1	71374	80360.2	107329	124344	1.90956e+06	10746.5	60052.7	1.45976e+06	650776	2.79229e+06	1.24614e+06	50450.6	594002	301213	78335.1	333434	519277	288845	486964	833116
P36222	ENSG00000133048	CHI3L1	5	5	220.84	0.47152	0.600468	1.2778	0.11297	0.588287	0.565655	1.31343	0.0851061	Outcome 0	Outcome 1	Chitinase-3-like protein 1 OS=Homo sapiens GN=CHI3L1 PE=1 SV=2	1	3	258271	143382	749527	1.10995e+06	111661	2.91564e+06	63439.5	156105	1.31432e+06	28857.3	96227.3	156574	73655.3	667281	18931.3	1.41475e+06	160382	105989	178967	1.65247e+06	319374	60510.2	495035	328113	602208	460592	385580	641088	172255	551900	357384
Q8CWT3	#N/A	#N/A	1	1	35.69	0.0659865	0.344342	1.43391	0.472409	0.0659865	0.269408	1.43391	0.472409	Outcome 1	Outcome 0	Chaperone protein DnaK OS=Streptococcus pneumoniae (strain ATCC BAA-255 / R6) GN=dnaK PE=3 SV=1	0	2	252100	3.6588e+06	150591	95441.3	45121.4	12990.8	49782.2	328913	169700	2.37429e+06	453261	207151	207297	37862.4	167750	53635.8	376297	165124	78397.6	79721	59322.9	159015	45193.5	2.51417e+06	381847	72195	87095.5	1.75616e+06	66962.7	4.44267e+06	585486
P00558;P07205	ENSG00000102144	PGK1	4	4	223.9	0.658418	0.662454	1.27455	0.0732594	0.756275	0.597545	1.22987	0.0613806	Outcome 0	Outcome 1	Phosphoglycerate kinase 1 OS=Homo sapiens GN=PGK1 PE=1 SV=3	0	2	247622	94847.9	14557.6	84713.5	16444.5	2.61417e+06	712467	965830	196168	195564	330069	286787	139478	114125	329655	859127	444193	67095.8	748539	153381	2.25025e+06	533500	193241	149495	3.75983e+06	88380.6	13769	500251	62543.1	117167	394098
P41439	ENSG00000110203	FOLR3	3	3	164.74	0.472835	0.600468	1.38413	0.112587	0.472835	0.527609	1.38413	0.112587	Outcome 1	Outcome 0	Folate receptor gamma OS=Homo sapiens GN=FOLR3 PE=1 SV=1	0	2	247029	11675.7	90206.8	243950	933276	228180	220280	757482	1.12789e+06	497780	268152	400472	346559	81170.2	275049	316949	185101	256929	443095	730368	314829	144847	206649	52450.9	49549.2	7803.54	40000.5	107743	226001	107650	178987
P62328	ENSG00000205542	TMSB4X	1	1	100.73	0.0880211	0.362293	1.62309	0.417051	0.0880211	0.289995	1.62309	0.417051	Outcome 0	Outcome 1	Thymosin beta-4 OS=Homo sapiens GN=TMSB4X PE=1 SV=2	1	2	233010	54517.6	11421.2	128743	619419	1.82808e+06	830923	3.05781e+06	4.31765e+06	109861	375547	1.1318e+06	642346	30945.9	946554	549776	1.10995e+06	362413	61516.7	43953.6	529490	249612	139822	8901.12	1.60285e+06	47966.5	78391.3	38659.4	88646.1	98123.7	113706
P20273	ENSG00000012124	CD22	1	1	33.88	0.279695	0.542718	1.26372	0.195955	0.279695	0.44567	1.26372	0.195955	Outcome 0	Outcome 1	B-cell receptor CD22 OS=Homo sapiens GN=CD22 PE=1 SV=2	0	2	231156	279751	775656	266041	372028	124125	177656	232488	23703.4	240251	180229	468473	216832	141411	219803	138530	44600.6	318178	831317	607468	652054	916628	306280	725181	247477	296010	468607	155310	133360	417077	82588.3
P80511	ENSG00000163221	S100A12	2	2	129.12	0.0801884	0.344342	1.17381	0.435112	0.0801884	0.276216	1.17381	0.435112	Outcome 1	Outcome 0	Protein S100-A12 OS=Homo sapiens GN=S100A12 PE=1 SV=2	0	2	230191	101013	86063.6	44723.1	141677	1.20731e+06	1.00767e+06	344633	1.09214e+06	154151	546474	343233	237735	205955	923010	1.35883e+06	578300	230097	742969	494293	509072	280702	91340	60433.9	3.28401e+06	84642.6	86962.8	71319.6	96216.7	230284	332432
P48595	ENSG00000242550	SERPINB10	2	2	85.24	0.552169	0.637633	1.22625	0.0925111	0.552169	0.564465	1.22625	0.0925111	Outcome 1	Outcome 0	Serpin B10 OS=Homo sapiens GN=SERPINB10 PE=1 SV=1	0	2	227401	413177	746240	376016	257473	613814	188246	214554	293172	169549	95237.3	108191	175923	526136	106121	173657	51255.3	240631	152705	265925	205277	268534	614520	449419	457374	746430	996383	757250	210420	952386	143473
P02042	ENSG00000223609	HBD	9	4	549.22	0.403955	0.591283	2.12608	0.135395	0.972142	0.658111	3.21524	0.0501429	Outcome 1	Outcome 0	Hemoglobin subunit delta OS=Homo sapiens GN=HBD PE=1 SV=2	0	2	226140	187993	4.5809e+06	607141	200556	1.35094e+06	786476	105681	464844	326681	207350	286977	288541	133189	202334	251372	170212	296833	167751	565867	80253.7	693734	1.54864e+06	194867	279476	186660	1.91609e+06	153344	101913	154760	81191.1
A0M8Q6	ENSG00000211685	IGLC7	4	1	267.08	0.134444	0.405805	1.35691	0.334113	0.776564	0.604305	8.48354	0.0595035	Outcome 1	Outcome 0	Ig lambda-7 chain C region OS=Homo sapiens GN=IGLC7 PE=4 SV=2	0	2	222550	161422	241419	204003	244818	98078.3	193536	146881	118091	168581	188515	114472	157683	198466	90175.5	363756	350072	196547	259960	242467	200479	126901	227690	103002	101961	367260	279545	383578	226387	334511	373706
P31146	ENSG00000102879	CORO1A	9	9	508.1	0.222513	0.495241	1.25801	0.237374	0.149038	0.355138	1.30763	0.313971	Outcome 0	Outcome 1	Coronin-1A OS=Homo sapiens GN=CORO1A PE=1 SV=4	1	2	222297	67368.3	194663	99066.3	9357.14	2.70042e+06	946079	1.15823e+06	1.99127e+06	156483	79705	237903	435081	50659.8	305750	1.90027e+06	211983	448917	588903	316391	3.6633e+06	694211	46311.2	203832	3.79709e+06	91728.5	11450	409783	26583.1	218536	378039
P35579;P35749;P35580;Q7Z406	ENSG00000100345	MYH9	9	9	581.83	0.102785	0.364275	1.14385	0.38678	0.0717765	0.272888	1.1638	0.456406	Outcome 0	Outcome 1	Myosin-9 OS=Homo sapiens GN=MYH9 PE=1 SV=4	0	2	219135	182937	356322	233973	120361	583826	367264	677425	1.4531e+06	105249	220744	213147	217526	55373.3	369473	547191	371675	267107	390160	136807	930723	271977	172474	143546	276138	167117	246729	203813	99294.2	89699.4	308453
P52566	ENSG00000111348	ARHGDIB	6	6	411.41	0.332984	0.551565	2.03882	0.166125	0.425934	0.51139	1.77882	0.127474	Outcome 0	Outcome 1	Rho GDP-dissociation inhibitor 2 OS=Homo sapiens GN=ARHGDIB PE=1 SV=3	1	2	215338	305103	174100	63655.9	197645	3.22788e+06	1.13891e+06	276179	865703	254031	78941.1	85704.2	90436.5	67182.3	120514	1.88265e+06	110912	117372	202893	355059	2.93809e+06	808010	148960	506888	81745.8	318954	80664.4	340125	57730.4	275582	382888
P07225	ENSG00000184500	PROS1	3	3	153.26	0.647954	0.662454	1.18198	0.074834	0.647954	0.569283	1.18198	0.074834	Outcome 1	Outcome 0	Vitamin K-dependent protein S OS=Homo sapiens GN=PROS1 PE=1 SV=1	1	2	214889	243440	24343.9	159502	250926	55602.2	144690	164788	500016	227299	196592	184129	127836	300160	138941	174248	203650	256634	422891	388237	109672	247636	153155	219501	59877.8	109450	44995.7	71167.8	134530	215122	76304
P05543	ENSG00000123561	SERPINA7	2	2	143.89	0.625652	0.654426	1.05542	0.0784079	0.625652	0.565655	1.05542	0.0784079	Outcome 0	Outcome 1	Thyroxine-binding globulin OS=Homo sapiens GN=SERPINA7 PE=1 SV=2	1	2	214836	368227	463345	17095.9	157078	162138	295313	174179	157945	260147	101235	307010	484940	456394	869.446	266098	31445.1	162209	309370	379643	356834	284615	496731	77836.5	56475.6	91369	203176	20912.2	102833	460920	72511.4
P55058	ENSG00000100979	PLTP	4	4	211.06	0.463034	0.600468	1.24321	0.11549	0.451938	0.519576	1.26176	0.118904	Outcome 1	Outcome 0	Phospholipid transfer protein OS=Homo sapiens GN=PLTP PE=1 SV=1	1	2	209906	376241	696392	92773.4	133560	1.271e+06	168159	44955.3	440016	107426	46009.9	119657	35057.4	970972	118827	397210	67641.2	624802	364063	91132	194573	311437	672395	1.07334e+06	158885	297324	196782	1.06839e+06	120733	1.66151e+06	163305
P18669;P15259	ENSG00000171314	PGAM1	3	3	150.83	0.65703	0.662454	1.10499	0.0734646	0.65703	0.569283	1.10499	0.0734646	Outcome 1	Outcome 0	Phosphoglycerate mutase 1 OS=Homo sapiens GN=PGAM1 PE=1 SV=2	0	2	203778	45497.2	109834	202672	36034.4	1.30259e+06	321358	953113	910798	68104	111756	431779	338779	26685.7	462092	622410	95765.1	477446	419541	206244	992867	218311	139477	256885	3.11223e+06	150338	129394	375650	105204	127911	277022
B2RPK0	ENSG00000124097	HMGB1P1	1	1	44.87	0.667462	0.666616	1.25571	0.0719493	0.667462	0.569609	1.25571	0.0719493	Outcome 1	Outcome 0	Putative high mobility group protein B1-like 1 OS=Homo sapiens GN=HMGB1P1 PE=5 SV=1	0	2	199777	27004.3	288953	282573	224417	676824	343783	303387	872460	107007	98157.4	184528	191342	135792	208494	314249	141631	145633	236138	316061	584698	291236	452933	83264.9	146027	204791	133920	279202	237734	216322	194763
P10643	ENSG00000112936	C7	5	5	261.27	0.00548522	0.165565	1.65317	0.830741	0.00723094	0.172191	1.59958	0.803598	Outcome 1	Outcome 0	Complement component C7 OS=Homo sapiens GN=C7 PE=1 SV=2	1	2	199656	311310	205330	63660.5	251307	109411	118761	51717.2	160457	94072	180965	79015.6	69887.7	157260	59935.9	336011	93775.9	256994	129509	132377	214214	143109	365975	355498	70805.5	407443	647902	280270	140731	134257	294454
P01594;P01599	ENSG00000281978	IGKV1-17	3	2	269.33	0.0916945	0.364275	3.29564	0.409092	0.0916945	0.294216	3.29564	0.409092	Outcome 1	Outcome 0	Ig kappa chain V-I region AU OS=Homo sapiens PE=1 SV=1	0	2	199009	53562.3	104087	170814	89884	61027.4	366704	207206	94914.3	226161	169546	207076	101905	169060	627254	399238	387016	149773	395641	291473	98018.5	389513	212618	621469	516231	8.04949e+06	1.00125e+06	453083	6.8983e+06	148058	180188
P04075	ENSG00000149925	ALDOA	5	3	280.29	0.633574	0.654426	1.44847	0.0771036	0.633574	0.565655	1.44847	0.0771036	Outcome 1	Outcome 0	Fructose-bisphosphate aldolase A OS=Homo sapiens GN=ALDOA PE=1 SV=2	1	2	196800	27396.2	228460	289154	41916	1.07617e+06	46020.5	678652	644944	25702.2	255997	468109	370990	37101.8	395842	197950	218903	410290	134901	195650	798769	210540	75378.9	57096.4	3.40753e+06	265060	113546	1.04697e+06	242491	45368.6	206483
P10599	ENSG00000136810	TXN	3	3	123.39	0.451282	0.600468	1.31269	0.11911	0.417986	0.51139	1.35963	0.130263	Outcome 1	Outcome 0	Thioredoxin OS=Homo sapiens GN=TXN PE=1 SV=3	1	2	195320	39231.3	178247	34293.1	32752.7	348061	73863.8	1.78511e+06	381194	82417.2	115004	188151	231565	35801.9	230212	665059	186387	130234	469344	169634	1.12587e+06	287888	457418	81163	1.582e+06	233145	337720	522452	59132.5	196860	119009
P07602	ENSG00000197746	PSAP	2	2	115.38	0.814319	0.718198	1.28847	0.0564956	0.814319	0.612488	1.28847	0.0564956	Outcome 1	Outcome 0	Prosaposin OS=Homo sapiens GN=PSAP PE=1 SV=2	1	2	193967	274222	293724	218114	173009	127492	46290.8	144629	739892	18287.3	145754	116999	105530	109476	285127	492461	222185	295131	40938.3	373617	262142	121441	263726	596194	830017	15340.8	814027	500790	144644	786744	60804.9
P0DMV8;P34931;P11021	ENSG00000204389	HSPA1A	9	8	485.42	0.540788	0.633223	1.40251	0.0950516	0.518636	0.547211	1.50243	0.100304	Outcome 1	Outcome 0	Heat shock 70 kDa protein 1A OS=Homo sapiens GN=HSPA1A PE=1 SV=1	0	2	182928	51421.9	63076	104525	190009	842715	150830	840288	756795	76012.5	405054	774360	345077	35846.7	459569	204764	356792	964347	237235	187192	816217	160480	47782.9	133021	3.02284e+06	142873	75443	261376	81625	114129	1.40763e+06
P05156	ENSG00000205403	CFI	1	1	47.62	0.991595	0.767235	1.14433	0.050013	0.991595	0.660226	1.14433	0.050013	Outcome 1	Outcome 0	Complement factor I OS=Homo sapiens GN=CFI PE=1 SV=2	1	2	179180	27694.2	2253.94	2715.22	13939.8	1118.22	150543	70287	420065	219702	175594	75766	210116	761152	22284.2	505646	108075	52008.6	238659	522625	230430	516751	13304	89742.2	69283.7	45070.7	339736	0	1016.47	179460	9340.91
Q08380	ENSG00000108679	LGALS3BP	3	3	194.17	0.60655	0.654225	1.28664	0.0817166	0.60655	0.565655	1.28664	0.0817166	Outcome 0	Outcome 1	Galectin-3-binding protein OS=Homo sapiens GN=LGALS3BP PE=1 SV=1	1	2	174832	306320	1.67456e+06	89380.4	204630	196968	188291	112899	206076	113930	41861.8	290372	174900	138869	36063.9	435477	73407.2	252135	426547	283700	277207	75560	274860	300225	69271.7	415229	913466	591930	176816	285015	184981
P00736	ENSG00000159403	C1R	5	5	343.28	0.332655	0.551565	1.41349	0.166289	0.346059	0.474024	1.43073	0.159787	Outcome 0	Outcome 1	Complement C1r subcomponent OS=Homo sapiens GN=C1R PE=1 SV=2	1	2	172788	300640	1.37217e+06	165339	329549	62424	168524	34834.1	600724	197002	121316	103383	180827	671386	114901	671780	168508	177051	91002.4	424013	82079.2	293756	108614	126499	108277	199977	352504	68229.8	67662.6	375296	120257
P20700	ENSG00000113368	LMNB1	1	1	39.7	0.453894	0.600468	1.18271	0.118292	0.453894	0.519576	1.18271	0.118292	Outcome 1	Outcome 0	Lamin-B1 OS=Homo sapiens GN=LMNB1 PE=1 SV=2	0	2	172178	156184	127351	145194	35530.7	908381	221345	538931	669003	80769	181836	451652	258294	82833.7	314929	532008	271970	160267	243197	64414.4	913471	403165	122461	785476	869144	296522	129933	234955	52613.1	193925	150735
P01767	ENSG00000282593	IGHV3-53	3	2	170.5	0.286025	0.547402	1.51639	0.192031	0.286025	0.445827	1.51639	0.192031	Outcome 1	Outcome 0	Ig heavy chain V-III region BUT OS=Homo sapiens PE=1 SV=1	0	2	171832	105335	40870.7	137302	117585	222678	191038	324816	59126.5	126464	110663	41069.6	40564.4	300052	89829	211571	2.55272e+06	175797	69108	106034	391674	184361	102100	47409.7	174574	3.57472e+06	16102.7	166032	1.8718e+06	111844	240720
Q9HD89	ENSG00000104918	RETN	3	3	244.4	0.0969409	0.364275	1.10895	0.398233	0.161329	0.368289	1.21427	0.298563	Outcome 1	Outcome 0	Resistin OS=Homo sapiens GN=RETN PE=1 SV=1	0	2	171488	112440	135117	292029	284078	661624	114920	611779	193901	104466	342321	169299	215409	123430	409998	593865	474597	256048	80612.2	303851	318134	182199	100739	51377.5	517961	96213.5	64699.6	152819	139161	184239	86400
P24592	ENSG00000167779	IGFBP6	1	1	53.89	0.407602	0.591283	1.14671	0.134035	0.407602	0.51139	1.14671	0.134035	Outcome 0	Outcome 1	Insulin-like growth factor-binding protein 6 OS=Homo sapiens GN=IGFBP6 PE=1 SV=1	1	2	168710	797839	4.71589e+06	23932.2	387998	74312.3	135219	128042	485488	157270	31316.1	30071	31336	492826	170506	695812	90976.5	78470.2	15124.2	207021	172366	29572.6	155555	188411	55522.4	1.00574e+06	1.35025e+06	2.17082e+06	166914	1.05126e+06	47545.4
P16401	ENSG00000184357	HIST1H1B	2	2	99.52	0.326493	0.551565	1.79701	0.169402	0.326493	0.457934	1.79701	0.169402	Outcome 0	Outcome 1	Histone H1.5 OS=Homo sapiens GN=HIST1H1B PE=1 SV=3	1	2	167460	165776	235115	126239	99518.7	3.30987e+06	613184	348641	230824	110101	43148.9	66968.2	68997.4	35272	238257	1.10437e+06	137135	265899	167368	77241.2	1.82867e+06	482297	246026	469886	187025	195150	108905	1.33555e+06	122325	143234	966309
P20848	ENSG00000258597	SERPINA2	2	1	77.06	0.108531	0.364275	3.54268	0.376118	0.134577	0.338948	3.67143	0.33392	Outcome 1	Outcome 0	Putative alpha-1-antitrypsin-related protein OS=Homo sapiens GN=SERPINA2 PE=1 SV=1	0	2	165267	85160.6	216224	707084	170482	41291.5	33939.2	176920	21090.4	30828.1	223478	171630	770077	122786	83716.4	44592.1	347493	572570	64916.1	171583	20300.7	91918.4	94692.9	109706	48526.8	54062.1	81731.2	174173	53901.6	142205	35393.9
P00338;P07195;Q9BYZ2	ENSG00000134333	LDHA	3	3	178.52	0.539197	0.633223	1.21182	0.0954151	0.506879	0.538809	1.39015	0.103267	Outcome 0	Outcome 1	L-lactate dehydrogenase A chain OS=Homo sapiens GN=LDHA PE=1 SV=2	0	2	163076	115220	50028.8	184879	71513.9	2.33799e+06	513918	547631	701862	109477	156437	148046	158274	41325.8	194120	671097	81300.2	186781	348351	52377.2	1.63473e+06	484878	124903	292432	1.60917e+06	54686.7	55677.4	379026	105891	144001	248609
P26038;P15311	ENSG00000147065	MSN	5	5	281.29	0.857188	0.734572	1.22619	0.0538067	0.915594	0.64355	1.1909	0.0513182	Outcome 0	Outcome 1	Moesin OS=Homo sapiens GN=MSN PE=1 SV=3	0	2	162748	88330.4	46775.5	218953	51077.2	1.59063e+06	226558	321868	463598	133424	389204	97951.1	59734.4	143049	84839.2	613016	44652.2	91682.4	279298	262810	1.03292e+06	208790	108543	100268	734047	56161.9	232184	254329	34456.3	170012	230334
Q13822	ENSG00000136960	ENPP2	2	2	71.97	0.769631	0.699244	1.17143	0.060124	0.769631	0.602916	1.17143	0.060124	Outcome 0	Outcome 1	Ectonucleotide pyrophosphatase/phosphodiesterase family member 2 OS=Homo sapiens GN=ENPP2 PE=1 SV=3	1	2	161788	186822	1.42289e+06	247099	277024	196067	221894	84320.5	339579	177636	119890	109060	111482	343528	64464.8	998262	99353.2	63043.4	55811.1	232252	165349	162327	105915	581933	45273.2	269489	1.03113e+06	413489	89273.2	1.02465e+06	191330
P26447	ENSG00000196154	S100A4	1	1	48.27	0.570822	0.638135	1.02932	0.088566	0.570822	0.564465	1.02932	0.088566	Outcome 1	Outcome 0	Protein S100-A4 OS=Homo sapiens GN=S100A4 PE=1 SV=1	0	2	160946	12069.6	4.1491e+06	393026	1936.39	821329	85042.6	493572	273255	10624.5	121337	314587	148162	15946.4	266052	175277	401223	338425	76802.4	117712	631146	195493	22492.6	96935.7	1.89103e+06	1.63254e+06	2.025e+06	2.09654e+06	90052.8	58710.3	157401
Q8DQJ4	#N/A	#N/A	5	5	259.77	0.340246	0.55347	1.60135	0.162563	0.249252	0.42597	1.73908	0.216542	Outcome 1	Outcome 0	Pyruvate oxidase OS=Streptococcus pneumoniae (strain ATCC BAA-255 / R6) GN=spxB PE=3 SV=1	0	2	159812	222456	619229	174427	217516	62483	151531	179181	128526	238599	187302	211659	191405	157369	74673.5	110350	154524	102543	235649	60958.8	216260	116774	80027.4	153247	237297	52153.7	130391	13083.9	174562	134839	197641
Q15782	ENSG00000064886	CHI3L2	2	2	106.17	0.732657	0.683952	1.33523	0.0638062	0.732657	0.58973	1.33523	0.0638062	Outcome 0	Outcome 1	Chitinase-3-like protein 2 OS=Homo sapiens GN=CHI3L2 PE=1 SV=1	1	2	153855	52331	1.20764e+06	329523	75996.3	1.3678e+06	27608.3	28652	714398	53463.9	70110	44525.3	65190.2	259706	75048.9	2.69731e+06	155893	93334.5	110394	2.31712e+06	781296	105692	72160.3	271394	679096	308080	194185	172285	195446	63276.5	993541
P0A472	#N/A	#N/A	4	4	248.53	0.000452428	0.0614521	4.49306	0.964812	0.000241934	0.0283342	4.60259	0.977688	Outcome 1	Outcome 0	50S ribosomal protein L7/L12 OS=Streptococcus pneumoniae (strain ATCC BAA-255 / R6) GN=rplL PE=3 SV=2	0	2	152197	31226.9	879195	103541	235235	170403	10559.2	145372	67617.7	16723.5	215169	100007	46687.1	125156	84688.2	240923	546010	37366.2	21518.7	34925.9	37278.4	16104.7	146621	55307.5	95003.8	148498	332128	749912	311092	137060	544346
O43707	ENSG00000130402	ACTN4	8	2	523.06	0.762129	0.697073	1.11537	0.0608198	0.60871	0.565655	1.53609	0.0813305	Outcome 1	Outcome 0	Alpha-actinin-4 OS=Homo sapiens GN=ACTN4 PE=1 SV=2	1	2	146037	25649.9	152671	143808	49091.6	572111	146338	416463	382743	34748	85700.5	254838	188040	73638.2	168863	282583	145735	267078	116067	148208	444823	165937	71342.3	65012.2	452123	203700	164187	85192.7	107469	124263	144053
P12429	ENSG00000138772	ANXA3	1	1	103.85	0.165919	0.438025	1.61151	0.293131	0.165919	0.368289	1.61151	0.293131	Outcome 0	Outcome 1	Annexin A3 OS=Homo sapiens GN=ANXA3 PE=1 SV=3	0	2	142400	86886.6	146500	171141	197602	79770.7	31983.9	786796	1.8018e+06	108782	362365	582506	55190.3	25843.7	92347.4	272014	206019	382648	666565	656535	61849.4	36313	150126	436963	294143	83965	56722.2	51685.7	56572.6	30408.1	51241.9
P07357	ENSG00000157131	C8A	4	4	233.9	0.597903	0.654225	1.1883	0.0832931	0.658945	0.569283	1.18774	0.0731818	Outcome 1	Outcome 0	Complement component C8 alpha chain OS=Homo sapiens GN=C8A PE=1 SV=2	1	2	141985	138665	856.277	4991.5	135583	67548.1	80039.8	112950	212006	76989.9	111833	153540	250889	240695	71970.4	235236	337882	417997	335454	245328	196657	198281	98759.9	56189.4	88458.5	40068.8	34597.7	13856.8	105073	135135	5354.94
P31949	ENSG00000163191	S100A11	2	2	100.17	0.749734	0.690403	1.59252	0.062026	0.749734	0.597545	1.59252	0.062026	Outcome 0	Outcome 1	Protein S100-A11 OS=Homo sapiens GN=S100A11 PE=1 SV=2	1	2	136511	123520	867744	37962.4	67018.5	1.22894e+06	142354	173219	273672	60573.2	33392.5	36609.3	99755.4	93328.4	98866.2	1.36144e+06	130668	233220	245309	60597.7	2.26884e+06	274434	123075	329240	171712	697491	404807	468969	63657.5	154223	117847
Q8DR03	#N/A	#N/A	1	1	44.44	0.491308	0.606267	1.01916	0.107388	0.491308	0.529909	1.01916	0.107388	Outcome 1	Outcome 0	Ketol-acid reductoisomerase OS=Streptococcus pneumoniae (strain ATCC BAA-255 / R6) GN=ilvC PE=3 SV=1	0	2	136271	247687	49176.5	184856	56434.9	156952	133850	87318.2	89697.7	136020	3.36053e+06	72240.6	30585	369896	22911.8	213005	357658	57937.8	302211	105464	83503.3	111369	314273	138963	90043.1	941875	839104	29897.3	160529	105964	238058
P01701	ENSG00000211644	IGLV1-51	1	1	54.81	0.393539	0.587401	1.99303	0.139386	0.393539	0.509278	1.99303	0.139386	Outcome 1	Outcome 0	Ig lambda chain V-I region NEW OS=Homo sapiens PE=1 SV=1	0	2	133763	188815	1.77534e+06	350064	286923	14039.6	259170	313363	35853.5	124862	300881	229180	110323	60392	158403	356736	1.94709e+06	302080	65460.6	124169	155655	95643.9	655174	91038.8	8.92105e+06	5.06689e+06	3.9289e+06	0	113663	33617.1	49579.2
P52565	ENSG00000141522	ARHGDIA	2	2	82.19	0.49545	0.606267	1.17595	0.106269	0.49545	0.529909	1.17595	0.106269	Outcome 1	Outcome 0	Rho GDP-dissociation inhibitor 1 OS=Homo sapiens GN=ARHGDIA PE=1 SV=3	1	2	129793	34018.8	267500	107945	11101.8	811135	71162.3	506710	289617	78977.9	39634.4	274897	277984	301061	234365	183596	305586	549036	295836	54581.9	346126	75378.7	97802.9	24712.3	216169	170194	1.61915e+06	55692	132143	106483	33182.5
P41218	ENSG00000163563	MNDA	1	1	42.11	0.464869	0.600468	1.59241	0.114938	0.464869	0.526024	1.59241	0.114938	Outcome 0	Outcome 1	Myeloid cell nuclear differentiation antigen OS=Homo sapiens GN=MNDA PE=1 SV=1	0	2	128796	31652.4	1533.03	0	0	0	320684	502290	2.02704e+06	1.17575e+06	54199	208927	716597	25793.5	1.65662e+06	1.57593e+06	112733	776837	574362	9952.92	439440	416451	105672	73982.6	31826.1	0	0	0	283105	0	2.63369e+06
P61160	ENSG00000138071	ACTR2	1	1	37.56	0.191594	0.470977	1.20039	0.265516	0.191594	0.390238	1.20039	0.265516	Outcome 0	Outcome 1	Actin-related protein 2 OS=Homo sapiens GN=ACTR2 PE=1 SV=1	0	2	126038	167992	405453	548500	353555	392462	129933	624807	255188	66901.1	12216.2	536355	4.16737e+06	40895.7	3.40039e+06	122144	101551	313425	52421.1	6791.16	351306	95872.9	34933.8	157244	8.15939e+06	207400	318327	90923.2	161122	322864	187248
P10124	ENSG00000122862	SRGN	1	1	96.93	0.420286	0.591283	1.46679	0.129447	0.432287	0.51139	1.46679	0.125303	Outcome 1	Outcome 0	Serglycin OS=Homo sapiens GN=SRGN PE=1 SV=3	1	2	125139	105991	0	460018	176924	219238	95761.7	129842	46917	33441.4	37776.6	21584.3	13916.8	244069	24086.2	160071	270811	87754	47224.1	366777	81644.7	31468.3	73475.2	14353.7	208231	0	15419.5	130088	342854	24530.6	243164
P14618	ENSG00000067225	PKM	3	3	159.33	0.725323	0.682318	1.68061	0.064614	0.725323	0.587712	1.68061	0.064614	Outcome 0	Outcome 1	Pyruvate kinase PKM OS=Homo sapiens GN=PKM PE=1 SV=4	1	2	118077	114035	126232	46996.1	30838.6	4.58296e+06	652461	58706.4	248939	126227	26971.3	71927.3	15688	75691.1	70969.1	1.06863e+06	52427.9	33636.7	221962	75683.2	1.4124e+06	524569	169892	100066	226936	1.06458e+06	67893	1.43633e+06	101326	111242	284222
P10145	ENSG00000169429	CXCL8	1	1	36.25	0.480253	0.601212	2.23576	0.110457	0.480253	0.528124	2.23576	0.110457	Outcome 1	Outcome 0	Interleukin-8 OS=Homo sapiens GN=CXCL8 PE=1 SV=1	0	2	117632	17092.3	0	28452.8	975504	11954.3	104706	180713	130751	18906.2	51520	28240.9	40367.8	551024	10594.9	39487.4	9096.92	1.97103e+06	178196	130558	12311.9	18169	0	6241.09	59082.3	967396	15091.7	14312.5	37431.6	0	15987.6
P03952	ENSG00000164344	KLKB1	1	1	66.7	0.0667103	0.344342	1.48067	0.470342	0.0667103	0.269408	1.48067	0.470342	Outcome 0	Outcome 1	Plasma kallikrein OS=Homo sapiens GN=KLKB1 PE=1 SV=1	1	2	109942	212692	19982.6	78312.8	87989.1	28583.3	122143	303049	334279	210275	352480	277578	349279	202883	77197.2	145403	217835	430069	469058	338525	79897.4	369305	210372	900497	9315.17	93283.4	28084.2	0	29650	85638.9	27895.1
P52209	ENSG00000142657	PGD	6	6	278.68	0.917307	0.752513	2.34592	0.0512649	0.815288	0.612488	1.73068	0.0564264	Outcome 0	Outcome 1	6-phosphogluconate dehydrogenase, decarboxylating OS=Homo sapiens GN=PGD PE=1 SV=3	1	2	109354	30261.8	10030.6	268926	40261.4	7.13515e+06	679154	274037	570163	49617.8	54117.6	74128.4	34677	11927.7	56989.4	1.94076e+06	41253.4	72404.2	488422	101613	3.85328e+06	764987	41332	26776.2	104345	97108.2	65394.2	1.07108e+06	94234.5	114363	557894
P05060	ENSG00000089199	CHGB	5	5	277.61	0.741866	0.687821	1.26475	0.062829	0.666483	0.569609	1.23389	0.0720889	Outcome 0	Outcome 1	Secretogranin-1 OS=Homo sapiens GN=CHGB PE=1 SV=2	1	2	109228	187236	2.86684e+06	121525	69104	73214.6	39638.9	36826.5	131984	57840.9	18778.4	69778.2	36867.9	68001.9	24085.1	251073	32704.2	352158	162686	58943.9	320766	548268	28895.7	203012	195386	297394	1.82876e+06	389141	111767	187440	76105.1
Q8CWN6	#N/A	#N/A	6	6	441.2	0.00115201	0.0917718	8.988	0.933597	0.00262882	0.115862	8.90154	0.888914	Outcome 1	Outcome 0	Glyceraldehyde-3-phosphate dehydrogenase OS=Streptococcus pneumoniae (strain ATCC BAA-255 / R6) GN=gapA PE=3 SV=1	0	2	109116	16092.3	82037.2	117825	236335	126405	24196.8	75489.1	62539.5	17668.9	295953	24041.8	24184.5	112999	33917	69716.8	146531	778502	57151.1	18944	27317.8	22720.5	25920.9	74822	55987.5	309585	33485	26581.9	593651	31255.2	32042.9
P26583	ENSG00000164104	HMGB2	1	1	60.31	0.0539727	0.344342	1.32307	0.509974	0.0539727	0.269408	1.32307	0.509974	Outcome 0	Outcome 1	High mobility group protein B2 OS=Homo sapiens GN=HMGB2 PE=1 SV=2	0	2	108461	36171.2	4910.18	194727	52854.8	409556	229192	1.26474e+06	581656	18310.3	57375.2	248352	279546	58728.2	428493	496009	349387	255911	186265	120377	1.10417e+06	185697	9886.47	142639	24451.5	479517	12990.7	58.3373	37885.4	30409	231342
Q8DPT3	#N/A	#N/A	1	1	24.06	0.044339	0.344342	2.37692	0.545634	0.044339	0.269408	2.37692	0.545634	Outcome 1	Outcome 0	Histone-like DNA-binding protein OS=Streptococcus pneumoniae (strain ATCC BAA-255 / R6) GN=hlpA PE=3 SV=1	0	2	108075	298035	336470	237323	147640	267544	175907	94530.3	61929.6	90551.2	72713.4	86397.7	52729.2	88883	79769.9	89015.8	91066.8	41399	62287.9	28877.6	141356	94024.8	253365	33070.1	158706	203321	176372	184508	205718	109582	253627
P60660;P14649	ENSG00000092841	MYL6	3	3	172.63	0.0823921	0.344342	1.05728	0.429871	0.0816911	0.277314	1.02183	0.431524	Outcome 0	Outcome 1	Myosin light polypeptide 6 OS=Homo sapiens GN=MYL6 PE=1 SV=2	0	2	107792	31703.4	33820.1	113185	6135.05	737053	235647	597755	575281	58511.9	146878	128486	350954	13387.5	285220	685699	113100	572995	427204	96535.2	1.42663e+06	365132	25750.7	60317.5	1.38915e+06	50608.9	72161.2	332002	21621.9	35797.8	178808
P0A4G3	#N/A	#N/A	2	2	175.89	0.00913128	0.199703	3.89586	0.77823	0.00913128	0.172191	3.89586	0.77823	Outcome 1	Outcome 0	Manganese ABC transporter substrate-binding lipoprotein OS=Streptococcus pneumoniae (strain ATCC BAA-255 / R6) GN=psaA PE=3 SV=1	0	2	103099	43061.8	84331.2	92987.2	100681	32351	22238.3	127082	86194.7	87411.9	242092	105516	74929.7	55916.6	156397	35611.9	593531	118019	61270.5	77714.7	69975	84280.5	93929.6	264673	164131	73254.3	66622.4	72010.1	401759	37541.9	287862
P15814	ENSG00000128322	IGLL1	2	2	173.11	0.682744	0.67423	2.35805	0.0698394	0.682745	0.57733	2.35805	0.0698394	Outcome 1	Outcome 0	Immunoglobulin lambda-like polypeptide 1 OS=Homo sapiens GN=IGLL1 PE=1 SV=1	0	2	99611.2	104038	76783.2	387925	57651.1	31280.4	38500.5	322607	155477	73214.7	148078	79688.8	83467.4	36830.6	83167.9	246241	719982	571879	63963.9	64929.2	25372.9	20351.5	736.73	488804	183208	336292	18499.8	127479	192812	442482	163996
P04040	ENSG00000121691	CAT	5	5	308.3	0.231474	0.49922	1.21358	0.23007	0.191049	0.390238	1.09928	0.266059	Outcome 1	Outcome 0	Catalase OS=Homo sapiens GN=CAT PE=1 SV=3	1	2	96255.2	9730.93	91499.2	81095.6	56455	473924	276646	488785	470568	32405	97412.1	425258	321257	6581.56	565594	211392	275945	752502	182998	117453	558933	191853	34104.7	32490.4	1.92154e+06	15875.6	74496.7	133856	75540.4	41683.7	48537.7
P07900;P08238;Q9NQH7	ENSG00000080824	HSP90AA1	4	4	236.5	0.218922	0.495241	1.65539	0.2404	0.238558	0.42597	1.61327	0.224532	Outcome 1	Outcome 0	Heat shock protein HSP 90-alpha OS=Homo sapiens GN=HSP90AA1 PE=1 SV=5	0	2	96057.9	54197	32576.2	71941.3	67402	571809	63281.5	282996	346349	17232.6	27750.8	29103.8	33921.1	51250.6	31942	110846	66557.6	39515.3	95236.1	73380.9	502060	169969	142005	64271.8	674787	303006	4568.57	102571	77487.3	20451.4	153149
P20774	ENSG00000106809	OGN	1	1	58.72	0.996978	0.767235	1.02155	0.0500016	0.996978	0.661541	1.02155	0.0500016	Outcome 0	Outcome 1	Mimecan OS=Homo sapiens GN=OGN PE=1 SV=1	1	2	95366.2	188350	26794.4	94278.1	276713	94333.9	205742	5951.19	184300	84386.5	95132.3	9705.67	12277.5	205608	50009.3	694715	81242.8	5678.14	23850.7	399476	156458	124262	71707.2	62353.8	37039.3	3196.69	756018	434659	154684	221897	12113
Q8DNN3	#N/A	#N/A	6	6	414.68	0.00327441	0.127073	2.27505	0.873554	0.0083163	0.172191	2.26418	0.788668	Outcome 1	Outcome 0	Uncharacterized protein OS=Streptococcus pneumoniae (strain ATCC BAA-255 / R6) GN=spr1625 PE=4 SV=1	0	2	95221.9	83008.8	29517.1	34436.7	51102.6	40712.5	104534	50700.4	49390.8	86723.4	129143	41704.7	41573.7	78398.9	25859.6	39654.3	1.36295e+06	57225.4	78323.1	53887.1	109458	110222	100679	40456.5	90504.2	112766	35281.1	65167.3	372539	46666.2	44336.5
P25788	ENSG00000100567	PSMA3	1	1	54.44	0.0951683	0.364275	1.17656	0.401838	0.0951683	0.296395	1.17656	0.401838	Outcome 1	Outcome 0	Proteasome subunit alpha type-3 OS=Homo sapiens GN=PSMA3 PE=1 SV=2	1	2	94923.3	14221	991343	5108	46589.6	249955	57279	69941	22025.1	37631.4	14892.7	88686.1	101114	35755.7	118271	66837.2	76048	236768	315234	325045	193913	73485.1	54392	62273	385607	29896.9	24944.1	54591.2	61154.2	114445	350917
P01606	ENSG00000242371	IGKV1-39	3	1	234.32	0.242055	0.499594	2.84638	0.221872	0.242055	0.42597	2.84638	0.221872	Outcome 1	Outcome 0	Ig kappa chain V-I region OU OS=Homo sapiens PE=1 SV=1	0	2	91915.9	107558	125614	44104.4	79807	123336	262136	191350	67202.2	30355.3	131823	256195	116731	65560.5	38756.2	68895.4	74787.6	109079	52865.8	66159.4	208846	99220.6	91552.5	611992	359128	2.14206e+06	194076	79383.1	82050.6	212572	4.26156e+06
O75882	ENSG00000088812	ATRN	1	1	82.36	0.0618286	0.344342	1.52417	0.484685	0.0618286	0.269408	1.52417	0.484685	Outcome 0	Outcome 1	Attractin OS=Homo sapiens GN=ATRN PE=1 SV=2	1	2	84901.4	102348	69466.1	388717	664511	12218.4	45188	81571.5	178853	131137	117278	162224	101933	71759.3	201646	64205.8	67913.2	315593	80549.6	342488	49019.1	117286	31251.9	53046.8	328162	17346.9	4794.03	621490	154648	47928.2	13455.1
P01604	ENSG00000282801	IGKV1-5	1	1	60.14	0.0987007	0.364275	2.2016	0.394716	0.0987007	0.296395	2.2016	0.394716	Outcome 0	Outcome 1	Ig kappa chain V-I region Kue OS=Homo sapiens PE=1 SV=1	0	2	84264.7	0	6.69725e+06	213653	7228.91	401442	35587.5	11570	226728	9531.7	73404	80680.4	34518.3	93748.4	0	91173.2	30602.6	0	41315	145877	69232.2	202210	0	177213	72600	2.473e+06	86983.2	186729	93734.6	24320.6	95464.6
P04431	ENSG00000242371	IGKV1-39	1	1	30.21	0.356633	0.571279	2.54647	0.154904	0.356633	0.484037	2.54647	0.154904	Outcome 0	Outcome 1	Ig kappa chain V-I region Walker OS=Homo sapiens PE=1 SV=1	0	2	74916.2	119508	242522	7843.16	14083.3	30993.2	196652	155014	12134.3	35847.9	213749	37866.1	23468.3	45462.8	33567.7	165495	29409.7	110558	82610.9	114712	5.85967e+06	50889.5	67665.7	151033	77026.8	67596.3	334892	32917.3	69510.1	14645.5	24772.8
P20061	ENSG00000134827	TCN1	1	1	34.58	0.10455	0.364275	1.33743	0.383445	0.10455	0.298645	1.33743	0.383445	Outcome 0	Outcome 1	Transcobalamin-1 OS=Homo sapiens GN=TCN1 PE=1 SV=2	0	2	70238.3	104563	38536.7	241796	124221	97480.8	50846.2	129800	58462.6	227787	76156.4	36238.8	17657.8	87876.9	70587.9	192545	13690.3	95984.6	72405.9	236089	173488	57667.6	207628	75308.5	33662	83995.7	89749	11206.7	18077.8	75292.5	97152.8
P16070	ENSG00000026508	CD44	1	1	57.18	0.995017	0.767235	1.53075	0.0500045	0.958096	0.654275	1.53075	0.0503237	Outcome 1	Outcome 0	CD44 antigen OS=Homo sapiens GN=CD44 PE=1 SV=3	1	2	70088.2	11852.3	94721.8	71352.9	49073.6	51410.9	16535.4	56954.7	160282	10886.9	93050.7	83041	36734.5	49598.7	42090.3	107185	45009.2	31203.7	8096.21	348568	137242	23317.7	89189	17102.1	206278	57330.5	84144.6	159875	83018.8	0	74440.8
P11142;P54652;P17066	ENSG00000109971	HSPA8	8	7	486.5	0.701086	0.674992	2.30839	0.0674736	0.615261	0.565655	2.11954	0.0801785	Outcome 1	Outcome 0	Heat shock cognate 71 kDa protein OS=Homo sapiens GN=HSPA8 PE=1 SV=1	0	2	68973.4	23297.2	54761.5	275937	51545.2	322923	37849	152677	145693	26624.1	50457.5	247819	77321.9	23347.7	58495.3	200970	119535	59136.5	128563	74732.2	170930	76313.7	38121.3	61188.9	535422	189451	167492	693941	51297.7	48079.5	860573
Q13231	ENSG00000133063	CHIT1	2	2	108.35	0.224465	0.495241	2.44457	0.235753	0.224465	0.42597	2.44457	0.235753	Outcome 1	Outcome 0	Chitotriosidase-1 OS=Homo sapiens GN=CHIT1 PE=1 SV=1	1	2	68525.1	51310.6	39949.4	556643	49983	243102	63542.8	255551	284486	45911.8	22367.8	14176.9	35963.9	38268.5	49311.3	71795.7	53667.1	69073.2	82945.8	96664	223481	46335	358711	104827	882877	307504	132905	218231	29055.8	254239	437923
P02778	ENSG00000169245	CXCL10	1	1	59.15	0.989418	0.767235	1.28053	0.0500206	0.989418	0.660226	1.28053	0.0500206	Outcome 1	Outcome 0	C-X-C motif chemokine 10 OS=Homo sapiens GN=CXCL10 PE=1 SV=2	1	2	67075.5	74814.3	0	9285.73	127139	4492.93	37215.1	531226	489474	198632	2231.7	123972	64978.5	107380	221373	133504	15.8046	41837	0	495025	3217.84	7882.91	97337	42044.8	4977.41	0	0	26430.5	208042	58260.6	1645.91
P09871	ENSG00000182326	C1S	2	2	110.71	0.618775	0.654426	1.04296	0.0795721	0.618775	0.565655	1.04296	0.0795721	Outcome 1	Outcome 0	Complement C1s subcomponent OS=Homo sapiens GN=C1S PE=1 SV=1	1	2	61819.9	198597	348609	134816	216972	60582.2	71337.4	11349.2	102157	20551.2	869.181	7724.32	8674.09	405177	16943.9	83414.4	23359.1	3260.78	356167	4401.06	170514	29552.2	21508.4	233290	73583.4	10572.8	550149	188334	240171	345579	4759.52
P51149	ENSG00000075785	RAB7A	1	1	66.99	0.332443	0.551565	1.46362	0.166395	0.332443	0.463503	1.46362	0.166395	Outcome 1	Outcome 0	Ras-related protein Rab-7a OS=Homo sapiens GN=RAB7A PE=1 SV=1	0	2	60756.8	71066.5	54973.8	18069.6	48628.4	656885	30500.7	261512	289700	23211.7	46083.6	66828.2	103715	31654.6	164726	108753	29044.8	97452.1	77842.3	52117	204252	48586	79266.9	98690.3	1.61236e+06	45375.5	91502.2	68626.4	58336.4	175737	303983
P04278	ENSG00000129214	SHBG	1	1	32.05	0.619563	0.654426	1.01472	0.0794372	0.619563	0.565655	1.01472	0.0794372	Outcome 0	Outcome 1	Sex hormone-binding globulin OS=Homo sapiens GN=SHBG PE=1 SV=2	1	2	60295.1	238941	67715.2	10051.1	41086.5	11410.3	147088	24562.6	23940.8	135167	284274	44006.8	203549	85376	55197.6	1.45334e+06	13786.4	4446.08	73381.7	94268.9	62292.8	243162	60618.9	1.64878e+06	2252.36	25069.8	231337	10177	16977.4	1.06855e+06	62382.7
Q99439	ENSG00000064666	CNN2	2	2	161.85	0.247739	0.499594	1.02274	0.217647	0.247739	0.42597	1.02274	0.217647	Outcome 0	Outcome 1	Calponin-2 OS=Homo sapiens GN=CNN2 PE=1 SV=4	0	2	57398.9	31027.5	9815.3	7649.51	17504.5	157004	80522.6	250125	126335	47433.8	35114.6	120910	74129.4	85015.9	124186	178180	65836.1	133028	97102.2	57316.6	233943	49091.5	34049	59808.6	4179.69	125102	14997.6	54909.6	12986	47296	81699.8
P25815	ENSG00000163993	S100P	1	1	98.34	0.706653	0.674992	1.94325	0.0667904	0.706653	0.57997	1.94325	0.0667904	Outcome 0	Outcome 1	Protein S100-P OS=Homo sapiens GN=S100P PE=1 SV=2	0	2	50579.4	39592.9	12790.2	63212.7	15162.8	3.17091e+06	490419	94241.4	55792.4	0	941.852	127202	1698.86	54703.5	184241	341132	15584.6	101396	310561	11170	1.92788e+06	41497.9	10431.2	26592.4	16741.1	114189	25531.2	1.01991e+06	59342.7	557491	546760
Q8DPG0	#N/A	#N/A	1	1	29.12	0.911922	0.752513	1.87747	0.0514359	0.911922	0.64355	1.87747	0.0514359	Outcome 1	Outcome 0	Glutamate dehydrogenase OS=Streptococcus pneumoniae (strain ATCC BAA-255 / R6) GN=gdhA PE=3 SV=1	0	2	47761.8	61262.6	71035.7	22043.5	49930.1	55075.6	32989.2	78241.5	84732	28270	114230	76732.9	27622.7	36590.7	81118.9	13363.2	95069.1	29126.5	6608.06	14824.6	39184.2	28705.2	63267.3	0	46127.6	45325.5	25680.6	136532	23696.4	14817.3	34519.5
P08134;P62745	ENSG00000155366	RHOC	2	2	107.07	0.259949	0.511927	1.04824	0.208963	0.259949	0.42597	1.04824	0.208963	Outcome 1	Outcome 0	Rho-related GTP-binding protein RhoC OS=Homo sapiens GN=RHOC PE=1 SV=1	0	2	47304.6	7086.48	5288.42	62097.5	15933.6	442114	105049	257054	183010	21271.5	129282	86190.4	85360.4	47372.3	128977	181781	17532.3	47236.8	130403	16985.2	451918	79639.8	39029.1	41155.4	809577	49617.2	14285.5	21217.6	4021.51	23093.1	85693.8
P07358	ENSG00000021852	C8B	2	2	86.23	0.245807	0.499594	1.14971	0.219069	0.245807	0.42597	1.14971	0.219069	Outcome 1	Outcome 0	Complement component C8 beta chain OS=Homo sapiens GN=C8B PE=1 SV=3	1	2	47124.4	106364	304790	21626.3	51345.3	77101.7	53253.8	3706.59	17447.7	22777.8	10607.3	5911.09	12753.9	77802.7	41884.8	141902	12511.7	29684.3	93333.2	14962.6	87649.8	96118.6	51211.7	65888.4	92483.6	69276.7	132433	36759.4	36643.8	236048	13330.3
P47756	ENSG00000077549	CAPZB	1	1	29.3	0.388319	0.58281	1.08874	0.141448	0.388319	0.505501	1.08874	0.141448	Outcome 1	Outcome 0	F-actin-capping protein subunit beta OS=Homo sapiens GN=CAPZB PE=1 SV=4	1	2	46395.6	79227.2	129808	42724.3	333804	187978	112596	29096.6	29059.6	33294.4	16617.5	15374.4	13180.2	17499.5	21092.9	435335	13728.5	12201.9	22765.8	11211.2	763058	235844	74973.3	11199.6	52633.2	90916.3	40758.3	191134	63729.5	28282.4	122552
P64023	#N/A	#N/A	1	1	45.35	0.0634484	0.344342	3.97973	0.479819	0.0634484	0.269408	3.97973	0.479819	Outcome 1	Outcome 0	Elongation factor G OS=Streptococcus pneumoniae (strain ATCC BAA-255 / R6) GN=fusA PE=3 SV=1	0	2	46360.4	6651.26	42580.8	24749.5	78156.2	16291.8	35508.8	0	211040	56729.1	124377	16661.3	21524	69301.3	24863.5	61552	21458.1	18271.7	233391	105371	45491.3	16759.5	29483.1	6995.98	9937.44	27452.8	69179.1	86038	321316	6957.81	55607.9
Q8DNP9	#N/A	#N/A	3	3	158.03	0.313347	0.551565	2.3352	0.17632	0.313347	0.447536	2.3352	0.17632	Outcome 1	Outcome 0	Thioredoxin OS=Streptococcus pneumoniae (strain ATCC BAA-255 / R6) GN=trxA PE=3 SV=1	0	2	44591.4	45412.8	19381.2	20249.4	12397.2	8457.85	41883.1	90982.9	43770	28592.8	50766.5	77947.6	63544.1	27089.7	87342.4	16856.9	144636	196679	112730	58593.5	20009.1	47376.6	66778	4123.22	150840	24123.1	20173.3	7035.49	18768.7	22943.6	8614.5
P43490	ENSG00000105835	NAMPT	2	2	111.77	0.311415	0.551565	2.04318	0.17737	0.311415	0.447536	2.04318	0.17737	Outcome 0	Outcome 1	Nicotinamide phosphoribosyltransferase OS=Homo sapiens GN=NAMPT PE=1 SV=1	0	2	43519.1	24556.8	16959.2	33425.4	16996.7	3.13099e+06	226743	22308.2	40866.2	28040.3	8193.2	1308.63	8311.69	7573.04	26979.8	563104	44629.7	17442.1	14698.4	42408.5	1.46326e+06	228781	16428.4	55672.9	137179	14874.7	5749.11	585634	86096.6	82013.5	349185
P46940	ENSG00000140575	IQGAP1	3	3	126.98	0.631861	0.654426	1.09459	0.0773823	0.631861	0.565655	1.09459	0.0773823	Outcome 1	Outcome 0	Ras GTPase-activating-like protein IQGAP1 OS=Homo sapiens GN=IQGAP1 PE=1 SV=1	1	1	42241.3	29094.7	41785.5	69755.4	39169.5	227925	48908.5	47135.2	64834.3	15565.8	22411.2	27280	33813.5	9821.37	69774.6	125631	104875	68773.1	24661.5	15124.5	219486	61378.8	33341.3	12406.2	472876	26682.7	257759	73434	45558.1	45676.3	39625.6
P09382	ENSG00000100097	LGALS1	1	1	26.19	0.112367	0.368214	1.21448	0.369304	0.112367	0.298645	1.21448	0.369304	Outcome 1	Outcome 0	Galectin-1 OS=Homo sapiens GN=LGALS1 PE=1 SV=2	1	1	41267.2	8987.13	55677.4	0	6728.29	438909	7706.9	53319	109706	7822.07	6155.48	6610.77	13903.1	11193.7	0	173757	33259.4	53800.8	61343.8	23617.2	296159	33013.9	76625.1	41575.8	122981	72523.2	294496	61504.8	38041.4	27704.9	53301.3
P06703	ENSG00000197956	S100A6	1	1	50.89	0.563306	0.637633	2.92797	0.0901237	0.563306	0.564465	2.92797	0.0901237	Outcome 1	Outcome 0	Protein S100-A6 OS=Homo sapiens GN=S100A6 PE=1 SV=1	0	1	41042	46883.3	303705	721251	34991.1	21780	99632.6	94089.4	17467.7	73439.6	4982.76	85484.1	34916.4	32256.3	22892.4	78545.5	22650.1	84156.6	31337.7	43618.2	346740	153334	119312	53906.3	6.74856e+06	1.96655e+06	32998.4	258551	41104.9	33914.2	343329
Q8DPS0	#N/A	#N/A	3	3	138.17	0.00296787	0.127073	7.10274	0.880629	0.00296787	0.115862	7.10274	0.880629	Outcome 1	Outcome 0	Enolase OS=Streptococcus pneumoniae (strain ATCC BAA-255 / R6) GN=eno PE=1 SV=1	0	1	40492.5	54858.5	58417.9	12995.9	96861.8	19022.4	107841	33847	12652.9	28523.5	13372.9	21220.4	30508.2	48248.9	49344.3	33307.8	45765.9	8551.77	6982.8	15029.5	25815.1	25853	28181.8	200726	39587.2	29425.1	11521.7	40164.9	173055	19065.4	20516.7
P0A2W1	#N/A	#N/A	1	1	66.72	0.0229739	0.316337	4.51012	0.655006	0.0229739	0.224217	4.51012	0.655006	Outcome 1	Outcome 0	Acyl carrier protein OS=Streptococcus pneumoniae (strain ATCC BAA-255 / R6) GN=acpP PE=3 SV=1	0	1	38323.4	4970.65	0	21365.8	79620.2	20755.8	53270	54765.7	9288.99	3273.2	24143.9	74.6067	22499.4	49717	2921.41	0	213932	34250.9	45855.7	29443	44641.6	39178.3	21090.3	177536	41710.4	37730.4	0	20492.4	29174.6	45044.3	136856
Q8WXD2	ENSG00000104112	SCG3	2	2	101.46	0.297003	0.551565	1.42507	0.185489	0.297003	0.447536	1.42507	0.185489	Outcome 0	Outcome 1	Secretogranin-3 OS=Homo sapiens GN=SCG3 PE=1 SV=3	1	1	36105	155493	2.86866e+06	31281.1	171926	81040.5	52661.1	3734.39	13492.5	70545.5	8367.14	11942.7	10314.9	55693	35689.3	122213	13369.5	15996.8	7451.54	10753.6	13436	94477	36520.6	58438.7	216184	316802	1.43857e+06	351043	70349.5	190596	23091.3
P26022	ENSG00000163661	PTX3	3	3	196.51	0.357503	0.571279	1.72586	0.154512	0.357503	0.484037	1.72586	0.154512	Outcome 1	Outcome 0	Pentraxin-related protein PTX3 OS=Homo sapiens GN=PTX3 PE=1 SV=3	1	1	33175.5	6029.93	5011.76	66052.7	19846.8	33110.1	7684.26	112434	51638.6	13720	21131.1	38317.3	62771.9	43047.3	13579.8	15809.3	23923.1	22248.6	38013	92413.2	33240.9	14026.5	8295.65	36023.3	3849.42	5418.05	7426.37	73749.9	16968.2	1456.51	57986.1
P09960	ENSG00000111144	LTA4H	3	3	146.33	0.338302	0.55347	1.52332	0.163506	0.338302	0.466124	1.52332	0.163506	Outcome 0	Outcome 1	Leukotriene A-4 hydrolase OS=Homo sapiens GN=LTA4H PE=1 SV=2	1	1	32853.1	12359.3	11492.8	5572.41	5174.98	133662	124077	153925	54613.9	33482.5	26036.2	64262.2	62941.1	25770.2	31304.6	97833.7	9821.22	28850.6	46902.8	18178.2	371819	74282.7	10097.1	702.747	143223	16804.5	4792.3	172728	11538.7	7751.31	43256.6
P20742	ENSG00000126838	PZP	11	4	636.39	0.373386	0.573074	2.52921	0.14758	0.431232	0.51139	2.59139	0.12566	Outcome 0	Outcome 1	Pregnancy zone protein OS=Homo sapiens GN=PZP PE=1 SV=4	1	1	32742.8	39465.2	58648.1	40198.9	22717.7	12467.6	18866.3	15616.1	17382.1	31463.3	113543	19558.3	74742.4	36646.3	28090.9	2.32341e+06	47954.7	48551	190701	35529.2	12199.5	43032.1	17250.6	55334.6	192438	18178.7	32316.6	15720.4	22863.2	707912	37662.6
P29350	ENSG00000111679	PTPN6	1	1	34.07	0.657293	0.662454	1.24096	0.0734257	0.657293	0.569283	1.24096	0.0734257	Outcome 0	Outcome 1	Tyrosine-protein phosphatase non-receptor type 6 OS=Homo sapiens GN=PTPN6 PE=1 SV=1	0	1	31187.9	729.79	1206.09	5933.79	47.0904	3556.44	98570.2	26143.7	14386.4	30261.5	70670.8	57089.6	228453	229903	302928	230072	345190	7975.63	272662	171628	7771.47	292053	199682	5216.1	35527.4	1275.5	2904.16	672.977	3914.08	2652.88	2775.66
P00915	ENSG00000133742	CA1	5	5	295.11	0.697226	0.674992	4.08331	0.0679567	0.819323	0.612488	4.1646	0.0561427	Outcome 1	Outcome 0	Carbonic anhydrase 1 OS=Homo sapiens GN=CA1 PE=1 SV=2	1	1	30076.6	241938	454390	54174.8	6733.06	263864	174795	15400.7	7903.18	27928	5811.04	76878.4	9952.91	5248	79367.3	12661	25510.6	91053.1	3928.94	29799.9	783296	239561	685034	26158.5	117128	25326.7	955864	53438.1	10510.2	41335.9	20461.2
P10153	ENSG00000169385	RNASE2	1	1	76.7	0.399384	0.591283	1.61217	0.137127	0.399384	0.51139	1.61217	0.137127	Outcome 0	Outcome 1	Non-secretory ribonuclease OS=Homo sapiens GN=RNASE2 PE=1 SV=2	1	1	29758.5	4166.67	0	150995	11663.5	23463.7	21179.3	665098	536243	8031.51	7898.2	865777	672418	4729.01	243838	23014	261494	815400	134651	584828	18809.5	33720.2	4586.77	4807.48	818251	6549.62	0	0	263976	250075	13129.1
Q6UX06	ENSG00000102837	OLFM4	1	1	62.11	0.0510829	0.344342	1.35992	0.520072	0.0510829	0.269408	1.35992	0.520072	Outcome 0	Outcome 1	Olfactomedin-4 OS=Homo sapiens GN=OLFM4 PE=1 SV=1	0	1	28911.7	8718.43	305223	423446	14365.9	480859	50956.6	2.20319e+06	5413.07	24670.4	126418	22069.8	267493	7576.38	4206.86	79746.4	74644.2	166059	104346	806655	348084	8846.01	5673.07	0	1.03034e+06	98661.4	58628.7	448.575	15154.2	8962.97	13244.7
Q92876	ENSG00000167755	KLK6	1	1	39.47	0.0616487	0.344342	1.02064	0.485232	0.0616487	0.269408	1.02064	0.485232	Outcome 1	Outcome 0	Kallikrein-6 OS=Homo sapiens GN=KLK6 PE=1 SV=1	1	1	28628.2	50247.4	1.72403e+06	20286.9	43079.7	36284.5	48696.4	13865.7	40942	8078.36	635.523	31106.1	32916.8	3881.56	16082.1	1005.03	0	25484	8367.81	71078.8	32728.2	11166.7	44565.2	28761.1	437654	366930	1.53908e+06	140298	9865.46	9677.3	162637
P08758	ENSG00000164111	ANXA5	2	2	125.35	0.939066	0.752513	1.46466	0.0506854	0.939066	0.646655	1.46466	0.0506854	Outcome 0	Outcome 1	Annexin A5 OS=Homo sapiens GN=ANXA5 PE=1 SV=2	1	1	28356.6	55197.9	23745.6	3303.68	17516.3	5262.44	45858.1	116328	420428	86112.7	62890	56227.2	15758	16911.7	28180.9	24300.2	6158.47	138081	17535.7	30566.7	5776.12	10164.5	22608.6	198385	32540.1	15378.5	5552.81	9693.26	10878.8	20669.6	10556.3
P50395;P31150	ENSG00000057608	GDI2	2	2	137.28	0.824128	0.719655	1.2843	0.0558136	0.824128	0.612488	1.2843	0.0558136	Outcome 0	Outcome 1	Rab GDP dissociation inhibitor beta OS=Homo sapiens GN=GDI2 PE=1 SV=2	0	1	27421.9	12133.3	22126.4	8636.25	51012.8	388216	168026	1267.98	46439	12446.3	43425.1	17095.2	42834.4	13781.7	3043.8	233753	4960.27	139096	16546.6	35542.8	393161	70089.6	24193.5	8120.2	9421.01	14141.8	3153.28	103696	81681.5	17266.9	14576.9
P02743	ENSG00000132703	APCS	3	2	165.68	0.597221	0.654225	1.30931	0.0834197	0.633686	0.565655	1.30931	0.0770855	Outcome 0	Outcome 1	Serum amyloid P-component OS=Homo sapiens GN=APCS PE=1 SV=2	1	1	25233.2	94619.8	24700.6	223082	1820.74	56501.6	18950.2	2632.8	85763.7	151849	6230.56	5460.34	1270.16	107034	6943.5	25736.4	316.925	11369.3	590263	2172.39	13314.3	44199.7	80819.2	218956	21020	65260.7	47194.1	6768.35	50229.7	39524.7	25954.5
Q86VB7	ENSG00000177575	CD163	2	2	139.39	0.00257626	0.127073	4.19455	0.890247	0.00257628	0.115862	4.19455	0.890247	Outcome 1	Outcome 0	Scavenger receptor cysteine-rich type 1 protein M130 OS=Homo sapiens GN=CD163 PE=1 SV=2	1	1	24455	25389.9	10321.4	11721	6221.07	37235	23331.4	12742.7	74898.8	5873.35	41910.5	3125.04	5035.19	77581.8	1421.49	13324.3	25287	86.1249	2790.24	18535.5	8377.6	5765.43	50621.4	21427.6	13732.1	60712.4	57744.8	1.06306e+06	60688.2	95288.5	78339.7
P11215	ENSG00000169896	ITGAM	3	3	158.94	0.875661	0.745698	1.29944	0.0528762	0.875661	0.629364	1.29944	0.0528762	Outcome 0	Outcome 1	Integrin alpha-M OS=Homo sapiens GN=ITGAM PE=1 SV=2	1	1	23654.4	492.56	91264.8	5969.11	20915.6	2844.18	6169.1	178090	285780	20338	25513.7	142831	18924	8314.73	5332.05	20113.8	20868.7	165889	56212.1	237816	21585.4	19007.2	810.336	23294.5	20155.9	16947.4	4755.57	35601.8	2373.15	7378.36	3144.73
Q8DNW9	#N/A	#N/A	2	2	120.85	0.478577	0.601212	2.58287	0.110933	0.52409	0.548029	2.58287	0.098972	Outcome 1	Outcome 0	Endopeptidase O OS=Streptococcus pneumoniae (strain ATCC BAA-255 / R6) GN=pepO PE=4 SV=1	0	1	21626.3	7164.88	5884.17	8005.29	19889.4	78388.4	12556.2	17460.4	13528.6	16162.8	63214.9	12853.7	10709.1	12872.9	59837.8	13240.1	34963.4	44680.7	12592.6	13429.5	19380.7	19532	3802.39	8799.66	27378.7	17052.6	52923.5	16570.2	15701.8	0	28608.4
P04275	ENSG00000110799	VWF	2	2	100.64	0.798383	0.709921	1.37764	0.05769	0.783643	0.604645	1.37764	0.0588923	Outcome 1	Outcome 0	von Willebrand factor OS=Homo sapiens GN=VWF PE=1 SV=4	1	1	20931.8	2147.51	0	28109.6	60484.2	8389.93	13752	85393.4	5616.25	7700.62	160101	152332	45547.6	18619	16908.9	4876.24	13426.7	106836	5631.84	92216.3	3762.88	12226.9	0	10325.1	16184.8	0	25779.6	528.879	15242.5	883.567	1111.78
P50552	ENSG00000125753	VASP	1	1	43.47	0.0464812	0.344342	1.56319	0.537185	0.0464812	0.269408	1.56319	0.537185	Outcome 0	Outcome 1	Vasodilator-stimulated phosphoprotein OS=Homo sapiens GN=VASP PE=1 SV=3	0	1	20203.8	1736.76	7114.9	3380.18	21346.4	397646	60732.7	242090	46718	4160.16	6682.86	174550	181720	5354.8	391018	192122	75642.7	281504	93750.7	10295.3	395277	45709.5	0	0	24479.7	3413.42	14439.8	22689.2	7004.92	0	16780.7
P13473	ENSG00000005893	LAMP2	1	1	50.7	0.112502	0.368214	1.11764	0.369067	0.112502	0.298645	1.11764	0.369067	Outcome 0	Outcome 1	Lysosome-associated membrane glycoprotein 2 OS=Homo sapiens GN=LAMP2 PE=1 SV=2	1	1	19888.8	55724.5	97483.5	0	18682.9	37015.6	17391.9	202409	278713	3115.86	5831.63	56202.5	79154.2	18467	9736.61	124897	37639.5	262040	32187.3	48599.7	56876.7	17430.3	27328.8	15615.4	21782.2	5383.44	796684	0	0	80985.9	821.218
P27105	ENSG00000148175	STOM	1	1	41.65	0.650333	0.662454	1.80851	0.0744703	0.650333	0.569283	1.80851	0.0744703	Outcome 0	Outcome 1	Erythrocyte band 7 integral membrane protein OS=Homo sapiens GN=STOM PE=1 SV=3	0	1	19790.5	18692	96745.8	7281.32	117018	9943.84	19416.6	60042.6	1.06708e+06	26287	27001.4	20837.2	9158.9	10790.6	34511.6	39318.6	2494.85	256914	6901.62	12293.5	20164.4	29809.2	11401.9	103250	10762	14421.2	109024	13951.9	11946.5	58721.7	12833.4
P21333	ENSG00000196924	FLNA	3	3	134.05	0.814405	0.718198	2.14665	0.0564894	0.77961	0.604645	2.14665	0.0592378	Outcome 1	Outcome 0	Filamin-A OS=Homo sapiens GN=FLNA PE=1 SV=4	1	1	18443.8	12012.9	21630.6	17192.7	1020.23	27361.4	6869.91	85994	69380	12453.6	14995.4	23393	45904.3	16143.4	77023.1	40436.5	15389.9	25444.3	7523.96	1932.39	46110.3	5286.12	18016.3	135317	416563	0	3151.55	2938.71	3365.91	13493.5	51948
P01769	ENSG00000282777	IGHV3-30	1	1	39.38	0.418341	0.591283	2.41312	0.130137	0.418341	0.51139	2.41312	0.130137	Outcome 1	Outcome 0	Ig heavy chain V-III region GA OS=Homo sapiens PE=1 SV=1	0	1	18247.4	0	404872	0	0	0	30441.9	60099.3	23134.2	160541	7757.73	23960.6	18248.4	6127.36	6896.98	24395.5	34385.4	0	0	11636.7	0	18246.4	19842.7	9707.1	21229	146.66	0	8450.28	0	0	7811.46
O75460	ENSG00000178607	ERN1	1	1	26.59	0.822685	0.719655	1.52789	0.0559114	0.822685	0.612488	1.52789	0.0559114	Outcome 1	Outcome 0	Serine/threonine-protein kinase/endoribonuclease IRE1 OS=Homo sapiens GN=ERN1 PE=1 SV=2	0	1	17833.3	9156.99	0	0	1074.07	4195.55	38209.5	17660.2	20579.6	27482.4	2418.93	18006.3	52367.3	113062	5395.88	4059.92	31435.8	1986.56	48291.8	3019.01	32386.8	35231.4	2.17025	11441	0	0	2071.02	0	0	124.21	2979.06
O15511	ENSG00000162704	ARPC5	1	1	29.85	0.246776	0.499594	4.20538	0.218355	0.246776	0.42597	4.20538	0.218355	Outcome 1	Outcome 0	Actin-related protein 2/3 complex subunit 5 OS=Homo sapiens GN=ARPC5 PE=1 SV=3	0	1	16623.5	25324.6	7061.6	23100	30997.2	9450.71	12984.7	0	18274.2	27531.2	7727.1	4324.31	0	0	35477.1	76724.3	0	0	10527.8	9756.36	20217.9	18226.4	21524.9	120043	672535	94463.4	161794	80703.4	13285.5	16991.4	36120.8
Q16270	ENSG00000163453	IGFBP7	2	2	121.22	0.836296	0.723174	1.03432	0.0550232	0.815767	0.612488	1.03432	0.0563924	Outcome 0	Outcome 1	Insulin-like growth factor-binding protein 7 OS=Homo sapiens GN=IGFBP7 PE=1 SV=1	1	1	16145.5	7642.76	291851	2529.89	35240	28102.5	19998.5	25309.9	4940.87	17055.3	1179.64	5058.67	140.408	26755.8	6206.6	119117	768.857	3255.1	1636.11	50575.5	15832.2	25316	17553.4	0	47222.4	15951	141183	1523.02	20238.2	57898.2	6308.91
Q13425	ENSG00000168807	SNTB2	1	1	42.85	0.646944	0.662454	2.21095	0.0749893	0.646944	0.569283	2.21095	0.0749893	Outcome 1	Outcome 0	Beta-2-syntrophin OS=Homo sapiens GN=SNTB2 PE=1 SV=1	0	1	16008.4	4945.02	14140.9	113600	15738.4	2791.18	2479.61	16278.3	74614.5	0.654362	75698.8	156738	104981	0	65420.7	0	32115.5	69470.2	6088.12	1289.49	4619.26	4132.26	3975.21	1838.3	4234.79	11036.6	12025.9	198508	474.517	14560.3	0
P08133	ENSG00000197043	ANXA6	1	1	46.02	0.0194362	0.293329	3.38441	0.680065	0.0194362	0.216789	3.38441	0.680065	Outcome 0	Outcome 1	Annexin A6 OS=Homo sapiens GN=ANXA6 PE=1 SV=3	1	1	15741.7	3509.42	52492.6	68292.8	8122.62	32639.7	8089.85	568168	1.31016e+06	13080.9	140849	281192	204632	10739.9	24960.8	124520	15050.9	284083	62245	8452.2	52576.5	7081.6	13068.2	7374.79	20634.5	23238	8408.69	15583.2	15339.4	3070.11	8574.85
P00742	ENSG00000126218	F10	1	1	62.27	0.45737	0.600468	1.47201	0.117215	0.45737	0.520051	1.47201	0.117215	Outcome 1	Outcome 0	Coagulation factor X OS=Homo sapiens GN=F10 PE=1 SV=2	1	1	15480.6	30941.9	42349.2	50352	42154.4	32495.7	17073.1	1967.56	13541.6	12427.6	1965.77	814.942	5257.56	61077.7	0	30774.6	1107.42	1240.87	30746.4	527.089	4220.23	26026	21891.1	14291.9	0	33714.8	30535.7	74854.2	23114.4	52254.2	7884.31
P61224	ENSG00000127314	RAP1B	1	1	40.92	0.101923	0.364275	1.31266	0.38843	0.101923	0.298645	1.31266	0.38843	Outcome 0	Outcome 1	Ras-related protein Rap-1b OS=Homo sapiens GN=RAP1B PE=1 SV=1	1	1	15462.4	2769.01	0	34857	0	349219	55476.1	151631	277357	5796.38	10133	75343.5	140740	0	67423	98980.8	12794.5	147118	106423	25207.7	416563	81398.1	0	0	657552	0	0	107901	0	14802.3	65230.6
Q9UM07	ENSG00000159339	PADI4	1	1	47.92	0.0291999	0.344342	3.1087	0.617044	0.0291999	0.263059	3.1087	0.617044	Outcome 0	Outcome 1	Protein-arginine deiminase type-4 OS=Homo sapiens GN=PADI4 PE=1 SV=2	0	1	15312.5	21803.5	14952	15882.2	11611.3	403463	9843.13	3823.08	163458	13972	7712.29	16307	16289.8	13339.2	22087.9	233967	8860.58	5858.63	30554.5	17277.2	153540	107561	4971.13	14388.8	75.6282	4581.51	8828.02	21746.7	13821.8	21533.8	9921.4
Q8DNU8	#N/A	#N/A	2	2	72.44	0.552889	0.637633	3.3168	0.0923538	0.589605	0.565655	3.3168	0.0848538	Outcome 1	Outcome 0	ABC transporter substrate-binding protein-sugar transport OS=Streptococcus pneumoniae (strain ATCC BAA-255 / R6) GN=ABC-SBP PE=4 SV=1	0	1	15180.9	1749.18	72833.4	22974.1	243921	1860.92	8768.95	4922.75	12782.2	30470.8	12064.5	6868.92	8095.57	9308.97	24672.2	12387.1	20455.5	7981.64	14352.5	16009.3	11654	13838.6	0	179429	5623.27	14278.4	41496.3	38162.9	4293.43	399.694	9819.23
P32119	ENSG00000167815	PRDX2	1	1	72.59	0.431399	0.591877	2.70525	0.125604	0.431399	0.51139	2.70525	0.125604	Outcome 1	Outcome 0	Peroxiredoxin-2 OS=Homo sapiens GN=PRDX2 PE=1 SV=5	1	1	14531.7	12470.6	421392	13665.7	18512.9	58154.1	30426.2	9362.54	11994.8	66553.7	16907.8	10727.3	25315	9664.02	14541.6	76432.1	12376.7	13917.7	8120.11	20703	34745.8	59268.5	51426.6	17200.7	11930	10257.4	429077	52197.2	9123.21	6787.79	3428.12
Q12805	ENSG00000115380	EFEMP1	2	2	69.27	0.223297	0.495241	1.20283	0.236721	0.225287	0.42597	1.20283	0.235076	Outcome 0	Outcome 1	EGF-containing fibulin-like extracellular matrix protein 1 OS=Homo sapiens GN=EFEMP1 PE=1 SV=2	1	1	14165.9	14479.9	14711.6	10288.7	42274.5	2907.58	8465.56	33492.2	77702.9	16507.7	26926.9	27815.1	206031	11693.4	20372.6	26479.8	65914.1	81032.1	10667.5	198487	5087.24	4264.42	9530.23	0	920.263	4271.52	7066.56	12118.3	13692.2	15714.2	277.06
Q562R1	ENSG00000169067	ACTBL2	8	0	470.13									---	---	Beta-actin-like protein 2 OS=Homo sapiens GN=ACTBL2 PE=1 SV=2	1	median normal CSF	15246.7
P10645	ENSG00000276781	CHGA	3	3	202.92	0.369536	0.573074	1.64749	0.149221	0.359871	0.484443	1.64749	0.15345	Outcome 0	Outcome 1	Chromogranin-A OS=Homo sapiens GN=CHGA PE=1 SV=7	1	1	13939.3	22694.3	2.19981e+06	61359	11467.5	11411.1	30262.5	10281	32180.1	68930.7	2721.12	7068.96	13805.6	14072.9	0	11393.4	18474.4	1394.32	2427.63	0	17095.5	26548.4	3395.05	1015.95	43854.2	158421	1.48209e+06	19762.4	57517.7	22186.4	11152.5
P54108	ENSG00000096006	CRISP3	1	1	73.72	0.0188337	0.293329	1.61815	0.68465	0.0188337	0.216789	1.61815	0.68465	Outcome 0	Outcome 1	Cysteine-rich secretory protein 3 OS=Homo sapiens GN=CRISP3 PE=1 SV=1	1	1	13150.9	0	0	151046	13673	0	36106.6	63355.5	132888	18065.5	0	67277.3	30383.7	29505.9	16141.4	21839.1	15054.7	114010	10019.8	818911	33744	9425.57	0	5476.57	51970.2	0	0	0	0	0	29218.4
P28799	ENSG00000030582	GRN	3	3	193.29	0.0624248	0.344342	1.14315	0.482881	0.0621636	0.269408	1.14315	0.483669	Outcome 1	Outcome 0	Granulins OS=Homo sapiens GN=GRN PE=1 SV=2	1	1	13097.4	420.72	1001.87	5894.13	2501.45	156255	47723.6	288350	52325.6	1822.05	19484	127493	105574	36.2046	241139	71085.9	48537.3	302396	27659.5	50939.6	231880	25615.5	0	986.732	753361	5524.1	488.962	93405.6	3693.22	3036.44	14416.2
Q8DQX8	#N/A	#N/A	1	1	33.16	0.428694	0.591283	3.58841	0.126525	0.428694	0.51139	3.58841	0.126525	Outcome 1	Outcome 0	Phosphoglycerate kinase OS=Streptococcus pneumoniae (strain ATCC BAA-255 / R6) GN=pgk PE=1 SV=1	0	1	12988.6	0	3086.44	12490.3	29503.3	4023.96	4349.99	32477.4	9182.03	3081.24	119679	45264.9	32715.5	2907.42	7567.24	15975.9	369827	45389.7	3728.21	47.4894	122656	4999.95	149.154	4655.13	825.734	64.3186	0	2667.12	83032.9	2171.04	31783.4
P28676	ENSG00000115271	GCA	1	1	31.95	0.467277	0.600468	2.46775	0.11422	0.467277	0.526207	2.46775	0.11422	Outcome 1	Outcome 0	Grancalcin OS=Homo sapiens GN=GCA PE=1 SV=2	0	1	11911.2	8065.13	7928.77	7643.41	27527.7	10451.7	23468.4	13624.8	77893.2	19937.7	26190.6	27363.3	35125	0	5168.23	5070.22	106054	10152.7	9177.32	0	26403.9	11289.5	11692.5	33888.4	195065	6684.51	8771.29	9643.14	8592.48	12130	1370.76
O43570	ENSG00000074410	CA12	1	1	29.21	0.977123	0.764958	1.10759	0.0500964	0.977123	0.659577	1.10759	0.0500964	Outcome 0	Outcome 1	Carbonic anhydrase 12 OS=Homo sapiens GN=CA12 PE=1 SV=1	1	1	11626.5	7741.01	2774.23	0	32.6031	31942.9	31117.6	9616.74	17725.9	14866.1	13722.7	7133.74	15899.7	8488.24	12597.9	52571.8	0	17688.9	12388.6	28199.3	79394.9	41954.5	2122.3	437.736	86765.4	164.019	64375.8	12393.3	379.724	193.489	390.185
Q96C19	ENSG00000142634	EFHD2	1	1	24.4	0.845735	0.727051	6.16384	0.0544518	0.845735	0.61719	6.16384	0.0544518	Outcome 1	Outcome 0	EF-hand domain-containing protein D2 OS=Homo sapiens GN=EFHD2 PE=1 SV=1	0	1	11610.8	46978.7	27942.3	8584.91	3370.97	66641.2	17736.8	13696.6	5700.73	144421	4962.98	333.811	11082.5	5250.61	1983.63	16670.5	3225.27	22649.1	21167.2	3078.55	72213.9	1142.25	70547.8	79397.8	1.57778e+06	653821	600.411	0	5458.2	53.6646	2680.1
P05089	ENSG00000118520	ARG1	2	2	124.1	0.291214	0.551565	2.15511	0.188899	0.291214	0.445827	2.15511	0.188899	Outcome 1	Outcome 0	Arginase-1 OS=Homo sapiens GN=ARG1 PE=1 SV=2	0	1	10705.4	1358.19	31459.2	11498.6	22251.3	39795	7189.14	66760.9	26296.3	2369.32	3535.29	11573.9	4376.98	2180.56	3615.35	16509.6	331.837	17699.3	10505.2	2369.42	68125	9674.84	5517.74	39135.8	505935	9861.56	14733.8	9239.04	6819.48	3971.2	12228.9
P07339	ENSG00000117984	CTSD	1	1	63.26	0.179434	0.464229	17.622	0.278046	0.179434	0.379528	17.622	0.278046	Outcome 1	Outcome 0	Cathepsin D OS=Homo sapiens GN=CTSD PE=1 SV=1	1	1	10622.8	15429.3	17731.7	0	0	2356.43	6705.53	9734.8	6251.14	4979.7	0	10612.2	14625	3937.74	0	11310.8	8239.89	14058.3	0	19249	5695.28	30226.4	0	70870.6	947828	41901.2	26523.8	5348.22	3836.85	8246.16	12410.8
P31946	ENSG00000166913	YWHAB	1	1	50.14	0.373393	0.573074	2.71513	0.147577	0.373393	0.499774	2.71513	0.147577	Outcome 0	Outcome 1	14-3-3 protein beta/alpha OS=Homo sapiens GN=YWHAB PE=1 SV=3	1	1	10196.3	10149.6	0	0	7525.02	807540	155783	0	0	2395.28	5125.39	4417.68	0	1936.92	14627.6	275338	5868.32	3612.23	10243.1	0	478148	35554.3	27790.5	11797.4	19952	6044.6	5579.91	158305	31849.4	22285.9	102950
P00918	ENSG00000104267	CA2	3	3	145.72	0.421075	0.591283	4.95223	0.129169	0.421078	0.51139	4.95223	0.129168	Outcome 1	Outcome 0	Carbonic anhydrase 2 OS=Homo sapiens GN=CA2 PE=1 SV=2	1	1	10138.3	12141.6	14597.5	50768.1	6466.78	31198.6	9821.85	2139.58	16512.5	14142.4	9656.99	7937.22	10030	7478.31	1712.01	3253.68	9990.56	10246.6	18853.3	11167	9494.99	28418.5	16801.6	16485.2	45287.3	6030.86	126078	36965.6	27749.5	104375	12056.7
P00491	ENSG00000198805	PNP	1	1	49.46	0.0603152	0.344342	1.22866	0.489332	0.0603152	0.269408	1.22866	0.489332	Outcome 1	Outcome 0	Purine nucleoside phosphorylase OS=Homo sapiens GN=PNP PE=1 SV=2	1	1	10003.4	0	93367.6	21447.8	7534.69	330118	14325.8	52716.5	38880.5	7106.42	7425.65	94463.8	88655	3008.48	22195.8	7279.45	6251.17	9856.93	28399.1	68402.4	131716	39181.4	0	0	311335	22987.7	15106.7	29172.8	0	3248.94	5231.53
P35754	ENSG00000173221	GLRX	1	1	50.95	0.952242	0.75362	1.21244	0.0504206	0.967279	0.656717	1.21244	0.0501973	Outcome 1	Outcome 0	Glutaredoxin-1 OS=Homo sapiens GN=GLRX PE=1 SV=2	1	1	9837.16	867.352	0	15531.4	67125.4	88424.4	8113.33	25827.5	337.13	12599.2	18224.3	20789.6	2046.11	24705.2	15258.9	32567.1	62293.4	5484.06	1026.21	3962.72	120605	17924.1	261.223	0	271440	2383.89	2678.73	42926.5	287.407	8083.56	3564.68
P15153	ENSG00000128340	RAC2	1	1	49.61	0.567226	0.637633	3.67065	0.0893061	0.567226	0.564465	3.67065	0.0893061	Outcome 0	Outcome 1	Ras-related C3 botulinum toxin substrate 2 OS=Homo sapiens GN=RAC2 PE=1 SV=1	0	1	9449.63	0	176187	5458.38	0	1.90387e+06	473063	0	1856.48	9390.23	6471.21	9310.87	0	15250	5392.17	788559	8658.91	2797.77	721.89	662.866	1.36211e+06	417242	3136.41	204671	0	41.5233	14141.5	713935	59.6486	59683.2	82477.5
P78417	ENSG00000148834	GSTO1	1	1	41.21	0.990887	0.767235	1.02	0.0500152	0.990887	0.660226	1.02	0.0500152	Outcome 0	Outcome 1	Glutathione S-transferase omega-1 OS=Homo sapiens GN=GSTO1 PE=1 SV=2	1	1	9133.11	5872.55	15083.5	3219.46	135649	36666.8	26655.5	25810.6	5859.2	2659.9	4995.66	9627.86	6440.93	6870	14030.7	18700.1	4748.31	1191.45	0	119.895	350432	45856.6	16545.8	25457.8	4358.39	4759.79	30377.7	38528.4	29901.4	128413	7040.47
Q8CWV4	#N/A	#N/A	1	1	62.54	0.544825	0.635212	1.88341	0.0941385	0.544825	0.559716	1.88341	0.0941385	Outcome 1	Outcome 0	50S ribosomal protein L5 OS=Streptococcus pneumoniae (strain ATCC BAA-255 / R6) GN=rplE PE=3 SV=1	0	1	9081.6	0	0	5036.09	0	13486.6	0	0	98555.5	1805.72	2544.64	29210.1	25150.3	2710.58	0	177321	51010.2	149996	11285	0	25307.7	29900.6	0	92830.7	0	0	9480.59	0	12058.8	8524.52	8621.62
P30086	ENSG00000089220	PEBP1	1	1	120.38	0.246247	0.499594	2.40287	0.218745	0.246247	0.42597	2.40287	0.218745	Outcome 1	Outcome 0	Phosphatidylethanolamine-binding protein 1 OS=Homo sapiens GN=PEBP1 PE=1 SV=3	1	1	8646.6	2644.92	32856	0	32802.4	0	8066.5	0	0	6569.45	0	138403	8732.29	3854.9	53881.1	40372.9	98853.3	1008.84	7755.46	0	0	0	0	18980.6	51846.3	21120.9	7045.38	10392.4	30491.9	130219	467061
Q8N6Q3	ENSG00000204936	CD177	1	1	27.17	0.952023	0.75362	1.02869	0.0504245	0.952023	0.652029	1.02869	0.0504245	Outcome 0	Outcome 1	CD177 antigen OS=Homo sapiens GN=CD177 PE=1 SV=2	1	1	8280.66	0	0	83349.7	6001.31	200482	0	67967.3	325737	5812.25	12146.1	0	12974.6	22918.2	0	35345.5	0	10273.4	0	83479.4	0	0	0	0	190669	1032.1	11866.5	10531.9	41291.5	0	0
P06454	ENSG00000187514	PTMA	1	1	101.1	0.00955673	0.199703	1.526	0.773011	0.00955673	0.172191	1.526	0.773011	Outcome 1	Outcome 0	Prothymosin alpha OS=Homo sapiens GN=PTMA PE=1 SV=2	1	1	8091.48	0	0	33480.2	15944.7	3072.98	26756.6	240889	91366.2	2491.28	19727.8	73817.7	63161.1	3743.91	149461	84031.7	188056	49795.3	22973.3	1593.42	143815	11159.6	0	0	4801.13	0	0	110711	6005.02	0	0
P0A484	#N/A	#N/A	1	1	96.39	0.193829	0.470977	5.80331	0.263312	0.193829	0.390535	5.80331	0.263312	Outcome 1	Outcome 0	50S ribosomal protein L29 OS=Streptococcus pneumoniae (strain ATCC BAA-255 / R6) GN=rpmC PE=3 SV=1	0	1	7976.43	3804.18	55930.7	23404.2	32961.7	20744.7	2527.66	5513.06	0	0	0	9031.95	0	3487.75	12278.1	0	13088.8	0	7122.02	0	12846	22338.8	568.854	8035.02	4062.44	0	59597	16184.6	62199.8	26208	0
P83593	ENSG00000211598	IGKV4-1	3	2	153.85	0.382977	0.578348	3.2472	0.143601	0.382976	0.505501	3.2472	0.143601	Outcome 1	Outcome 0	Ig kappa chain V-IV region STH (Fragment) OS=Homo sapiens PE=1 SV=1	0	1	6689.58	9520.75	9660.08	12857.2	73716.7	4722.01	5239.52	816.147	29056.5	16399.3	427.25	1809.45	1160.43	74.73	3716.43	4439.05	2262.74	4359.48	16928.5	105.312	8000.45	11393.7	14897.1	18244.7	33383.8	9871.36	5615.6	26723.5	905.181	3345.01	30556.4
P32320	ENSG00000158825	CDA	2	2	124.06	0.798674	0.709921	1.40566	0.0576672	0.800939	0.609108	1.40566	0.0574912	Outcome 1	Outcome 0	Cytidine deaminase OS=Homo sapiens GN=CDA PE=1 SV=2	0	1	6630.65	0	15293.1	35365.1	38969.9	439960	9472.78	2371.97	52638.5	0	2399.48	16152.3	13383.8	0	3539.29	29382.6	103.169	2577.02	2881.97	13809.8	59049.1	0	0	0	693412	5236.14	81654.4	0	10112.9	11469.9	14978.4
Q643R3	ENSG00000176454	LPCAT4	1	1	59.02	0.0601764	0.344342	2.31698	0.489763	0.0601764	0.269408	2.31698	0.489763	Outcome 0	Outcome 1	Lysophospholipid acyltransferase LPCAT4 OS=Homo sapiens GN=LPCAT4 PE=1 SV=1	0	1	6042.81	3375.29	81385	0	76.3259	443281	12791.4	883612	35037.3	5693.62	676837	1.07681e+06	788761	6392	0	996.474	436304	3.1562e+06	0	75988.3	20683	2344.27	0	1936.34	439219	118.051	179875	0	2343.91	0	13950.9
P59998	ENSG00000241553	ARPC4	2	2	86.82	0.0590833	0.344342	2.23047	0.49319	0.0590835	0.269408	2.23047	0.49319	Outcome 0	Outcome 1	Actin-related protein 2/3 complex subunit 4 OS=Homo sapiens GN=ARPC4 PE=1 SV=3	1	1	5648.36	904.954	8110.81	34510.7	5905.31	572074	101433	5155.39	5789.64	5569.45	4099.26	7345.22	4392.87	625.296	7653.08	231165	152594	1912.39	65678.4	5727.27	475083	105102	4330.48	3715.86	747163	41515.5	37494.9	78750.1	52378.8	9435.51	24202.7
P0DMR1	ENSG00000179412	HNRNPCL4	2	2	75.88	0.862468	0.736772	2.1674	0.053527	0.831375	0.612488	2.1674	0.0553355	Outcome 0	Outcome 1	Heterogeneous nuclear ribonucleoprotein C-like 4 OS=Homo sapiens GN=HNRNPCL4 PE=3 SV=1	0	1	5623.7	1011.99	0	5480.24	4771.29	224621	27111.3	1893.69	16362.9	2901.54	2519.15	760.36	4441.3	10157	8508.11	99347.4	1983.1	9630.72	1266.03	9347.46	101519	19031.7	1267.61	35616.5	39519.6	15083.3	1416.84	35302.5	4347.73	2873.35	23480.3
Q05315	ENSG00000105205	CLC	1	1	33.05	0.428789	0.591283	1.35231	0.126492	0.428789	0.51139	1.35231	0.126492	Outcome 1	Outcome 0	Galectin-10 OS=Homo sapiens GN=CLC PE=1 SV=3	0	1	4869.01	0	171553	9680.26	5.03774	73044	139945	2205.99	54011.7	0	35.7082	2985.16	0	0	3695.71	64288.1	0	7185.13	35363.3	0	126090	165586	5075.83	98125.1	548631	5664.91	3333.96	170156	17174.7	958.417	0
P80723	ENSG00000176788	BASP1	4	4	197.59	0.952723	0.75362	1.38074	0.0504122	0.727641	0.587712	1.392	0.0643558	Outcome 1	Outcome 0	Brain acid soluble protein 1 OS=Homo sapiens GN=BASP1 PE=1 SV=2	1	1	4858.51	11140.5	4439.43	31140.9	153.984	738140	10228.7	24612.2	5962.58	0	1142.2	183.542	0	48.581	5277.58	86284.4	3321.04	1143.29	9543.27	80.6069	155750	296.738	2449.28	0	696246	7780.73	120698	93261.1	21590.1	659.072	1875.96
P46108	ENSG00000167193	CRK	1	1	25.84	0.925906	0.752513	1.16513	0.0510146	0.925906	0.64355	1.16513	0.0510146	Outcome 1	Outcome 0	Adapter molecule crk OS=Homo sapiens GN=CRK PE=1 SV=2	1	1	4494.44	21258.5	205370	19608.6	25.4383	106449	7921.05	0	0	30520.1	0	0	991.527	3452.99	0	0	6412.69	0	33685.7	25562.8	5489.23	15013	22633.2	1832.01	117495	0	112461	396.965	37861.6	309149	122480
P17213	ENSG00000101425	BPI	1	1	52.23	0.60689	0.654225	3.66083	0.0816556	0.60689	0.565655	3.66083	0.0816556	Outcome 0	Outcome 1	Bactericidal permeability-increasing protein OS=Homo sapiens GN=BPI PE=1 SV=4	1	1	3988.11	0	697.212	205.152	0	8802.94	6095.51	229804	317434	2364.62	2947.83	27189.6	44025.2	14699.5	81665.3	3448.52	0	117950	2044.69	0	31842.2	5005.23	11225.2	1902.54	19723.1	0	4527.71	7802.56	6078.45	0	5647.89
P02730	ENSG00000004939	SLC4A1	1	1	72.82	0.936341	0.752513	14.2701	0.0507482	0.936341	0.646655	14.2701	0.0507483	Outcome 1	Outcome 0	Band 3 anion transport protein OS=Homo sapiens GN=SLC4A1 PE=1 SV=3	0	1	3842.18	34591.2	7420.84	7347.87	268.454	13144.1	6321.28	4222.15	3541.97	3251.58	4368.86	26926.3	564.74	3439.07	283.499	4142.4	3359.21	14.2874	4.58458	12568.8	46.1608	1736.77	2205.7	150.017	2853.43	1.83414e+06	15664.3	758.562	35688.4	6153.54	36032
P12111	ENSG00000163359	COL6A3	1	1	58.63	0.921548	0.752513	5.011	0.051138	0.921548	0.64355	5.011	0.051138	Outcome 0	Outcome 1	Collagen alpha-3(VI) chain OS=Homo sapiens GN=COL6A3 PE=1 SV=5	1	1	3535.58	11214.4	15300.1	0	4407.23	2858.95	10624.2	0	4839.87	11598.7	2254.55	0	3383.25	19231.6	10.8551	13214.7	0	0	1313.2	294322	6823.05	2850.73	6689.31	5990.34	0	157.651	3964.05	257.598	0	1622.78	4123.07
Q8CWV3	#N/A	#N/A	1	1	63.22	0.0530589	0.344342	20.1291	0.513116	0.0530589	0.269408	20.1291	0.513116	Outcome 1	Outcome 0	50S ribosomal protein L6 OS=Streptococcus pneumoniae (strain ATCC BAA-255 / R6) GN=rplF PE=3 SV=1	0	1	3316.47	0	0	2743.82	4298.77	0	0	1478.66	16869.2	44.1497	4515.38	0	735.304	6572.15	5976.31	0	954.859	16534.4	0	0	323.009	137.18	0	0	0	1314.34	0	0	202570	0	0
P0A4C4	#N/A	#N/A	1	1	69.64	0.295405	0.551565	4.04002	0.186421	0.295405	0.447536	4.04002	0.186421	Outcome 1	Outcome 0	30S ribosomal protein S3 OS=Streptococcus pneumoniae (strain ATCC BAA-255 / R6) GN=rpsC PE=3 SV=1	0	1	3046.92	7034.05	971.681	57760.4	0	38460.2	304.594	1829.89	10185.2	6625.69	0	363.171	14191.5	2257.73	5458.45	37.7773	0	6543.19	0	0	0	0	0	0	890.789	56.9686	1390.12	16263.8	0	0	3194.39
P09467	ENSG00000165140	FBP1	1	1	38.3	0.42678	0.591283	1.52791	0.127182	0.42678	0.51139	1.52791	0.127182	Outcome 1	Outcome 0	Fructose-1,6-bisphosphatase 1 OS=Homo sapiens GN=FBP1 PE=1 SV=5	1	1	2965.16	13540	0	1333.86	8017.34	27051.8	2262.04	1725.44	32061.4	4584.55	3337.4	5307.32	1159.5	33.3651	21218.2	16254.5	2758.48	0	842.867	8747.28	31875.8	15178.1	26581	1335.68	1236.61	9273.63	5684.46	6872.61	0	4657.38	6791.53
Q8DQ84	#N/A	#N/A	1	1	51.88	0.00800492	0.197689	9.13044	0.792823	0.00800492	0.172191	9.13044	0.792823	Outcome 1	Outcome 0	Pyruvate kinase OS=Streptococcus pneumoniae (strain ATCC BAA-255 / R6) GN=pykF PE=3 SV=1	0	1	2959.85	0	0	29154.5	3273.8	1105.87	0	0	7805.98	0	3495.18	7206.43	0	907.096	657.412	0	5843.71	0	0	0	0	0	5854.6	0	139787	0	90594	7018.2	0	17839.3	0
P51693	ENSG00000105290	APLP1	2	2	100.53	0.931059	0.752513	5.24638	0.050878	0.878203	0.629364	5.24638	0.0527587	Outcome 0	Outcome 1	Amyloid-like protein 1 OS=Homo sapiens GN=APLP1 PE=1 SV=3	1	1	2666.86	736.794	1.4894e+06	9927.08	23916.9	117300	3771.59	13297.8	2493.05	0	2360.68	1486.48	9365.51	9268.28	0.376608	2085.41	19531.2	3788.65	0	1768.77	3687.47	0	1396.33	10137.7	44169.3	22.3241	290165	7886.3	2021.75	1730.56	2082.36
Q8CZ23	#N/A	#N/A	1	1	36.43	0.0765767	0.344342	24.2616	0.443994	0.0765767	0.272888	24.2616	0.443994	Outcome 1	Outcome 0	Uncharacterized protein OS=Streptococcus pneumoniae (strain ATCC BAA-255 / R6) GN=spr0563 PE=4 SV=1	0	1	2539.83	533.573	9721.96	913.935	1823.99	2266.34	2751.27	3226.38	8599.26	4242.54	0	0	0	483.773	4264.98	2012.42	2233.95	0	0	0	0	0	7129.61	74444	16433.7	6377.19	0	8670.56	4390.4	2914.5	1396.95
P13591	ENSG00000149294	NCAM1	2	2	182.47	0.529172	0.633223	2.22406	0.097754	0.53563	0.554355	2.22406	0.0962376	Outcome 0	Outcome 1	Neural cell adhesion molecule 1 OS=Homo sapiens GN=NCAM1 PE=1 SV=3	1	1	2435.46	5957.13	250439	527.791	2553.51	2336.56	0	8031.73	3937.57	0	0	1648.61	11547.4	0	573.293	0	0	80160.5	0	6851.49	0	0	0	1003.2	23194.4	18391.8	42058.6	24554	13329.7	7681.79	5776.45
Q8CWS9	#N/A	#N/A	1	1	36.15	0.0587494	0.344342	18.1337	0.494248	0.0587494	0.269408	18.1337	0.494248	Outcome 1	Outcome 0	50S ribosomal protein L11 OS=Streptococcus pneumoniae (strain ATCC BAA-255 / R6) GN=rplK PE=3 SV=1	0	1	2378.51	189.219	1549.91	0	3715.19	5301.1	214.713	417.24	3174.14	0	4822.2	4162.07	0	2925.21	7835.9	71.4753	0	1914.3	0	2614.34	0	1550.2	1520.9	0	2712.83	116.936	2418.83	4466.25	243.805	3148.07	248.46
P25787	ENSG00000106588	PSMA2	1	1	71.59	0.53724	0.633223	3.54555	0.0958651	0.53724	0.554355	3.54555	0.0958651	Outcome 1	Outcome 0	Proteasome subunit alpha type-2 OS=Homo sapiens GN=PSMA2 PE=1 SV=2	1	1	2259.28	0	2993.44	0	141.612	13339	25161.7	32781.6	4343.98	5906.28	1962.52	10211.5	10002.4	9551.18	0	0	0	0	4037.75	0	5717.54	140.277	1469.57	271.718	571580	5958.91	0	5372.64	0	0	0
Q8DMY4	#N/A	#N/A	1	1	69.87	0.256968	0.511927	5.7049	0.211036	0.256968	0.42597	5.7049	0.211036	Outcome 1	Outcome 0	General stress protein GSP-781 OS=Streptococcus pneumoniae (strain ATCC BAA-255 / R6) GN=gsp-781 PE=4 SV=1	0	1	2231.79	254.501	0	11358.8	0	0	0	4444.58	46806.7	0	4674.74	2920.84	146.126	0	5000.98	11382.3	7283.46	0	0	6172.8	0	0	0.562912	0	9412.34	0	15013.8	40293.5	0	22937.8	0
O15143	ENSG00000130429	ARPC1B	1	1	52.24	0.366687	0.572485	1.33056	0.15045	0.414249	0.51139	1.33056	0.131603	Outcome 0	Outcome 1	Actin-related protein 2/3 complex subunit 1B OS=Homo sapiens GN=ARPC1B PE=1 SV=3	0	1	2092.27	0	580.568	0	53182.3	1976.7	27592.5	15662.1	27380.2	957.325	1463.8	1720.82	8676.96	437.252	2314.92	32947.8	731.725	437.357	16303.2	3645.98	85980.9	11589.2	2001.76	3439.06	207916	668.611	0	691.288	5.69341	1107.2	0.379664
O43505	ENSG00000174684	B4GAT1	1	1	31.54	0.838563	0.723174	11.1376	0.0548827	0.838563	0.61573	11.1376	0.0548827	Outcome 0	Outcome 1	Beta-1,4-glucuronyltransferase 1 OS=Homo sapiens GN=B4GAT1 PE=1 SV=1	1	1	1944.15	5824.4	1.02409e+06	2070.9	0.00252014	0	1294.01	0	1438.53	3558.27	4012.5	5536.91	0	10283.5	2423.34	6890.51	0	1410.46	0	2704.67	3264.04	0	0	6455.14	4343.75	0	1817.4	6.4297	0	0	2395.91
Q8CWR9	#N/A	#N/A	1	1	47.19	0.0723937	0.344342	3.19821	0.454769	0.0723937	0.272888	3.19821	0.454769	Outcome 1	Outcome 0	30S Ribosomal protein S1 OS=Streptococcus pneumoniae (strain ATCC BAA-255 / R6) GN=rpsA PE=1 SV=1	0	1	1757.52	1585.46	0	0	3983.41	24035.8	628.238	10.8194	1332.48	1752.82	27347.8	2008.88	762.454	4586.47	0	303.367	39522.1	2603.32	1126.91	571.044	406.409	307.019	1899.99	0	123.627	199.413	1546.22	1459.49	9912.18	211.671	369.885
P02654	ENSG00000130208	APOC1	1	1	34.01	0.881313	0.745835	1.63308	0.0526183	0.881313	0.629364	1.63308	0.0526183	Outcome 1	Outcome 0	Apolipoprotein C-I OS=Homo sapiens GN=APOC1 PE=1 SV=1	1	1	502.076	0	0	466.201	5545.59	0.685606	0.716194	0	813.282	0	4464.02	121128	12537.1	325.573	537.951	101.35	0.314004	50648.4	0	4433.3	7308.93	6545.86	5678.76	340555	1477.25	0	2018.62	0	0	0	0
P05204	ENSG00000198830	HMGN2	1	1	35.33	0.0013513	0.0917718	6.92777	0.926399	0.0013513	0.105506	6.92777	0.926399	Outcome 0	Outcome 1	Non-histone chromosomal protein HMG-17 OS=Homo sapiens GN=HMGN2 PE=1 SV=3	0	1	497.08	734.329	228.641	1501.15	334.46	17398.1	5739.8	28940	49437	5583.92	4425.71	5317.45	1784.12	629.307	344.45	46119.9	5835.8	14.2803	146.176	116.221	770.212	1561.18	49.7482	364.852	39.0034	46.9527	0	0	190.947	72.9337	214.348
Q14203	ENSG00000204843	DCTN1	1	1	36.45	0.921246	0.752513	3.24031	0.0511468	0.921246	0.64355	3.24031	0.0511468	Outcome 1	Outcome 0	Dynactin subunit 1 OS=Homo sapiens GN=DCTN1 PE=1 SV=3	0	1	430.568	17024.6	55011	1115.01	0	63766.9	2426.64	0	5143.61	173.888	58.0463	51.6103	5961.88	8445.69	1265.56	25125.6	0	0	327.207	0	33505.6	0	6153.66	600370	7423.17	359.569	0	268.725	54530.8	0	4210.02
P11413	ENSG00000160211	G6PD	1	1	37.49	0.0752415	0.344342	1.09307	0.447374	0.0733609	0.272888	1.09307	0.452228	Outcome 1	Outcome 0	Glucose-6-phosphate 1-dehydrogenase OS=Homo sapiens GN=G6PD PE=1 SV=4	0	1	417.898	0	607.209	1845.81	0	0	1144.28	16378.2	21028.7	0	1502.78	0	798.409	1099.5	637.774	10851	790.925	100.484	2010.75	0	27210.1	6759	0	420.926	56586	647.235	0	634.435	0	0	0
A6NHG4	ENSG00000275758	DDTL	1	1	32.17	0.238043	0.499594	14.9581	0.224928	0.238043	0.42597	14.9581	0.224928	Outcome 1	Outcome 0	D-dopachrome decarboxylase-like protein OS=Homo sapiens GN=DDTL PE=2 SV=1	0	1	109.718	1955.6	0	0	0	0	0	2958.29	0	139.422	50.6157	0	80.015	4707.5	0	8325.93	2606.25	169.751	4107.86	5557.69	0	0	2832.16	2949.51	582815	6296.5	297.334	0	37545.8	12.0485	26107.9
P60630	#N/A	#N/A	1	1	42.12	0.485835	0.602646	5.46193	0.108892	0.485835	0.529293	5.46193	0.108892	Outcome 1	Outcome 0	50S ribosomal protein L24 OS=Streptococcus pneumoniae (strain ATCC BAA-255 / R6) GN=rplX PE=3 SV=1	0	1	32.8639	29.1511	0	2.36395	466.524	21.5039	6797.4	0	0	0	27683.4	463.992	7.38636	2637	0	1274.67	13988.3	0	182.691	0	4479.31	0	492.357	2718.43	0	0	0	0	3.39399	4690.38	14547.6
Q9H503	ENSG00000125888	BANF2	1	1	22.92	0.181186	0.464339	1.0416	0.276183	0.181186	0.379528	1.0416	0.276183	Outcome 0	Outcome 1	Barrier-to-autointegration factor-like protein OS=Homo sapiens GN=BANF2 PE=1 SV=1	0	1	0	0	0	507265	0	0	3914.83	0	0	0	0	0	0	0	0	0	473.594	0	0	0	0.583702	0	0	0	723577	37117.4	4225.17	1000.46	0	0	0
O00533	ENSG00000134121	CHL1	1	1	33.92	0.661077	0.662674	1.36309	0.0728694	0.661077	0.569283	1.36309	0.0728694	Outcome 0	Outcome 1	Neural cell adhesion molecule L1-like protein OS=Homo sapiens GN=CHL1 PE=1 SV=4	1	1	0	41178.4	572554	39704.5	0	92514.7	0	0	5400.29	0	0	8672.62	0	0	0	0	0	0	8217.51	0	16785.4	0	12855.1	0	0	56456.6	407087	86360.7	0	0	1389.08
P46976	ENSG00000163754	GYG1	1	1	35.29	0.899754	0.749586	4.43268	0.0518629	0.899754	0.638639	4.43268	0.0518629	Outcome 1	Outcome 0	Glycogenin-1 OS=Homo sapiens GN=GYG1 PE=1 SV=4	1	1	0	0	0	9183.19	0	126079	408.407	2675.02	0	0	7570.97	4207.56	0	0	0.412935	0	9083.29	114.596	2518.94	16121.6	0	0	0	0	1.00218e+06	0	0	57560.8	4837.18	0	0
P22352	ENSG00000211445	GPX3	1	1	54.87	0.621705	0.654426	1.76625	0.0790724	0.621705	0.565655	1.76625	0.0790724	Outcome 1	Outcome 0	Glutathione peroxidase 3 OS=Homo sapiens GN=GPX3 PE=1 SV=2	1	1	0	7532.99	0	50828.8	0	0	4860.63	0	0	17376.6	0	0	32352.4	33462.8	18215.2	137177	0	0	9003.14	54926.9	0	22591.8	8090.13	0	6513.84	188581	0	631282	43789.2	37122	19415.4
O94772	ENSG00000176956	LY6H	1	1	55.82	0.937814	0.752513	1.74753	0.0507139	0.937814	0.646655	1.74753	0.0507139	Outcome 0	Outcome 1	Lymphocyte antigen 6H OS=Homo sapiens GN=LY6H PE=1 SV=1	1	1	0	0	192027	0	132.414	26443.9	0	0	0	0	0	16307.1	0	0	6451.5	0	16451.8	51595	0	146965	0	0	0	0	18854.8	78946.1	150508	11090.4	0	0	0
Q8DRI0	#N/A	#N/A	1	1	35.32	0.704236	0.674992	22.6851	0.0670851	0.704236	0.57997	22.6851	0.0670851	Outcome 1	Outcome 0	Surface protein pspA OS=Streptococcus pneumoniae (strain ATCC BAA-255 / R6) GN=pspA PE=4 SV=1	0	1	0	0	507.329	1011.12	2074.01	131.009	0	7.01986	0	147.525	0	0	35.8229	327.141	2.28195	0	0	0	0	0	0	0	37.3303	5295.97	23.0627	17327	360.788	1096.03	0	57.7914	1543.94
P0A3N0	#N/A	#N/A	1	1	79.22	0.687899	0.674625	5.93646	0.0691565	0.687899	0.577518	5.93646	0.0691565	Outcome 1	Outcome 0	L-lactate dehydrogenase OS=Streptococcus pneumoniae (strain ATCC BAA-255 / R6) GN=ldh PE=1 SV=2	0	1	0	9775.69	91142.9	35037.5	0	27060.7	0	0	14702.3	0	10698.8	3739.27	11604.3	0	27398	0	0	0	0	0	0	0	0	3561.5	8266.83	12683.6	20726.7	46986.2	0	0	0
P09104	ENSG00000111674	ENO2	3	0	176.67									---	---	Gamma-enolase OS=Homo sapiens GN=ENO2 PE=1 SV=3	1
P0C0L4	ENSG00000227746	C4A	41	0	2847.02									---	---	Complement C4-A OS=Homo sapiens GN=C4A PE=1 SV=2	1
P01593	ENSG00000239975	IGKV1D-33	2	0	171.79									---	---	Ig kappa chain V-I region AG OS=Homo sapiens PE=1 SV=1	1
P01765;P01774;P01776	#N/A	#N/A	2	0	207.86									---	---	Ig heavy chain V-III region TIL OS=Homo sapiens PE=1 SV=1	0
P04207;P01605	#N/A	#N/A	2	0	123.45									---	---	Ig kappa chain V-III region CLL OS=Homo sapiens PE=4 SV=2	0
P18135	#N/A	#N/A	3	0	157.08									---	---	Ig kappa chain V-III region HAH OS=Homo sapiens PE=2 SV=1	0
P01621	#N/A	#N/A	3	0	197.05									---	---	Ig kappa chain V-III region NG9 (Fragment) OS=Homo sapiens PE=2 SV=1	0
P06312;P06314	#N/A	#N/A	3	0	201.99									---	---	Ig kappa chain V-IV region (Fragment) OS=Homo sapiens GN=IGKV4-1 PE=4 SV=1	0
Accession			Peptide count	Unique peptides	Confidence score	Anova (p)	q Value	Max fold change	Power	AP_Anova (p)	AP_q Value	AP_Max fold change	AP_Power	Highest mean condition	Lowest mean condition	Description				EmmaWall_batch1_280515_06_sample1_mzcorrected	EmmaWall_batch1_280515_12_sample6_mzcorrected	EmmaWall_batch1_280515_16_sample10_mzcorrected	EmmaWall_batch1_280515_21_sample14_mzcorrected	EmmaWall_batch1_280515_22_sample15_mzcorrected	EmmaWall_batch2_010615_16_mzcorrected	EmmaWall_batch2_010615_19_mzcorrected	EmmaWall_batch2_010615_20_mzcorrected	EmmaWall_batch2_010615_21_mzcorrected	EmmaWall_batch2_010615_22_mzcorrected	EmmaWall_batch2_010615_24_mzcorrected	EmmaWall_batch2_010615_25_mzcorrected	EmmaWall_batch2_010615_27_mzcorrected	EmmaWall_batch2_010615_29_mzcorrected	EmmaWall_batch3_030615_06_31_mzcorrected	EmmaWall_batch3_030615_07_32_mzcorrected	EmmaWall_batch3_030615_16_40_mzcorrected	EmmaWall_batch3_030615_19_42_mzcorrected	EmmaWall_batch3_030615_22_45_mzcorrected	EmmaWall_batch4_050615_13_52_mzcorrected	EmmaWall_batch4_050615_17_55_mzcorrected	EmmaWall_batch1_280515_07_sample2_mzcorrected	EmmaWall_batch1_280515_08_sample3_mzcorrected	EmmaWall_batch1_280515_10_sample5_mzcorrected	EmmaWall_batch1_280515_13_sample7_mzcorrected	EmmaWall_batch1_280515_14_sample8_mzcorrected	EmmaWall_batch1_280515_15_sample9_mzcorrected	EmmaWall_batch1_280515_18_sample11_mzcorrected	EmmaWall_batch1_280515_19_sample12_mzcorrected	EmmaWall_batch1_280515_20_sample13_mzcorrected
																				Outcome 0																					Outcome 1
																chi square	1	#N/A
																	2
																	3
																	4
[truncated: 188 more columns]

## Sheet: SpN prot summary
Accession	Peptide count	Unique peptides	Confidence score	Anova (p)	q Value	Max fold change	Power	AP_Anova (p)	AP_q Value	AP_Max fold change	AP_Power	Highest mean condition	Lowest mean condition	Description	group							median normalised abundance
Q8CWR9	1	1	47.19	0.0723937	0.344342	3.19821	0.454769	0.0723937	0.272888	3.19821	0.454769	Outcome 1	Outcome 0	30S Ribosomal protein S1 OS=Streptococcus pneumoniae (strain ATCC BAA-255 / R6) GN=rpsA PE=1 SV=1	Ribosomal protein				30S Ribosomal protein S1 OS=Streptococcus pneumoniae (strain ATCC BAA-255 / R6) GN=rpsA PE=1 SV=1	31	1	1757.52	179788
P0A4C4	1	1	69.64	0.295405	0.551565	4.04002	0.186421	0.295405	0.447536	4.04002	0.186421	Outcome 1	Outcome 0	30S ribosomal protein S3 OS=Streptococcus pneumoniae (strain ATCC BAA-255 / R6) GN=rpsC PE=3 SV=1	Ribosomal protein				30S ribosomal protein S3 OS=Streptococcus pneumoniae (strain ATCC BAA-255 / R6) GN=rpsC PE=3 SV=1	32	1	3046.92
Q8CWS9	1	1	36.15	0.0587494	0.344342	18.1337	0.494248	0.0587494	0.269408	18.1337	0.494248	Outcome 1	Outcome 0	50S ribosomal protein L11 OS=Streptococcus pneumoniae (strain ATCC BAA-255 / R6) GN=rplK PE=3 SV=1	Ribosomal protein				50S ribosomal protein L11 OS=Streptococcus pneumoniae (strain ATCC BAA-255 / R6) GN=rplK PE=3 SV=1	3	1	2378.51
P60630	1	1	42.12	0.485835	0.602646	5.46193	0.108892	0.485835	0.529293	5.46193	0.108892	Outcome 1	Outcome 0	50S ribosomal protein L24 OS=Streptococcus pneumoniae (strain ATCC BAA-255 / R6) GN=rplX PE=3 SV=1	Ribosomal protein				50S ribosomal protein L24 OS=Streptococcus pneumoniae (strain ATCC BAA-255 / R6) GN=rplX PE=3 SV=1	4	1	32.8639
P0A484	1	1	96.39	0.193829	0.470977	5.80331	0.263312	0.193829	0.390535	5.80331	0.263312	Outcome 1	Outcome 0	50S ribosomal protein L29 OS=Streptococcus pneumoniae (strain ATCC BAA-255 / R6) GN=rpmC PE=3 SV=1	Ribosomal protein				50S ribosomal protein L29 OS=Streptococcus pneumoniae (strain ATCC BAA-255 / R6) GN=rpmC PE=3 SV=1	5	1	7976.43
Q8CWV4	1	1	62.54	0.544825	0.635212	1.88341	0.0941385	0.544825	0.559716	1.88341	0.0941385	Outcome 1	Outcome 0	50S ribosomal protein L5 OS=Streptococcus pneumoniae (strain ATCC BAA-255 / R6) GN=rplE PE=3 SV=1	Ribosomal protein				50S ribosomal protein L5 OS=Streptococcus pneumoniae (strain ATCC BAA-255 / R6) GN=rplE PE=3 SV=1	6	1	9081.6
Q8CWV3	1	1	63.22	0.0530589	0.344342	20.1291	0.513116	0.0530589	0.269408	20.1291	0.513116	Outcome 1	Outcome 0	50S ribosomal protein L6 OS=Streptococcus pneumoniae (strain ATCC BAA-255 / R6) GN=rplF PE=3 SV=1	Ribosomal protein				50S ribosomal protein L6 OS=Streptococcus pneumoniae (strain ATCC BAA-255 / R6) GN=rplF PE=3 SV=1	7	1	3316.47
P0A472	4	4	248.53	0.000452428	0.0614521	4.49306	0.964812	0.000241934	0.0283342	4.60259	0.977688	Outcome 1	Outcome 0	50S ribosomal protein L7/L12 OS=Streptococcus pneumoniae (strain ATCC BAA-255 / R6) GN=rplL PE=3 SV=2	Ribosomal protein				50S ribosomal protein L7/L12 OS=Streptococcus pneumoniae (strain ATCC BAA-255 / R6) GN=rplL PE=3 SV=2	8	2	152197
Q8DNU8	2	2	72.44	0.552889	0.637633	3.3168	0.0923538	0.589605	0.565655	3.3168	0.0848538	Outcome 1	Outcome 0	ABC transporter substrate-binding protein-sugar transport OS=Streptococcus pneumoniae (strain ATCC BAA-255 / R6) GN=ABC-SBP PE=4 SV=1					ABC transporter substrate-binding protein-sugar transport OS=Streptococcus pneumoniae (strain ATCC BAA-255 / R6) GN=ABC-SBP PE=4 SV=1	9	1	15180.9
P0A2W1	1	1	66.72	0.0229739	0.316337	4.51012	0.655006	0.0229739	0.224217	4.51012	0.655006	Outcome 1	Outcome 0	Acyl carrier protein OS=Streptococcus pneumoniae (strain ATCC BAA-255 / R6) GN=acpP PE=3 SV=1					Acyl carrier protein OS=Streptococcus pneumoniae (strain ATCC BAA-255 / R6) GN=acpP PE=3 SV=1	10	1	38323.4
Q8CWT3	1	1	35.69	0.0659865	0.344342	1.43391	0.472409	0.0659865	0.269408	1.43391	0.472409	Outcome 1	Outcome 0	Chaperone protein DnaK OS=Streptococcus pneumoniae (strain ATCC BAA-255 / R6) GN=dnaK PE=3 SV=1					Chaperone protein DnaK OS=Streptococcus pneumoniae (strain ATCC BAA-255 / R6) GN=dnaK PE=3 SV=1	33	2	252100
P64023	1	1	45.35	0.0634484	0.344342	3.97973	0.479819	0.0634484	0.269408	3.97973	0.479819	Outcome 1	Outcome 0	Elongation factor G OS=Streptococcus pneumoniae (strain ATCC BAA-255 / R6) GN=fusA PE=3 SV=1					Elongation factor G OS=Streptococcus pneumoniae (strain ATCC BAA-255 / R6) GN=fusA PE=3 SV=1	11	2	46360.4
P64031	8	8	631.87	6.43395e-06	0.00174781	2.88038	0.999003	1.58e-05	0.0037027	3.51728	0.99768	Outcome 1	Outcome 0	Elongation factor Tu OS=Streptococcus pneumoniae (strain ATCC BAA-255 / R6) GN=tuf PE=3 SV=1	virulence, plasminogen binding				Elongation factor Tu OS=Streptococcus pneumoniae (strain ATCC BAA-255 / R6) GN=tuf PE=3 SV=1	34	3	919857
Q8DNW9	2	2	120.85	0.478577	0.601212	2.58287	0.110933	0.52409	0.548029	2.58287	0.098972	Outcome 1	Outcome 0	Endopeptidase O OS=Streptococcus pneumoniae (strain ATCC BAA-255 / R6) GN=pepO PE=4 SV=1	virulence				Endopeptidase O OS=Streptococcus pneumoniae (strain ATCC BAA-255 / R6) GN=pepO PE=4 SV=1	35	1	21626.3
Q8DPS0	3	3	138.17	0.00296787	0.127073	7.10274	0.880629	0.00296787	0.115862	7.10274	0.880629	Outcome 1	Outcome 0	Enolase OS=Streptococcus pneumoniae (strain ATCC BAA-255 / R6) GN=eno PE=1 SV=1					Enolase OS=Streptococcus pneumoniae (strain ATCC BAA-255 / R6) GN=eno PE=1 SV=1	36	1	40492.5
P0A4G3	2	2	175.89	0.00913128	0.199703	3.89586	0.77823	0.00913128	0.172191	3.89586	0.77823	Outcome 1	Outcome 0	Manganese ABC transporter substrate-binding lipoprotein OS=Streptococcus pneumoniae (strain ATCC BAA-255 / R6) GN=psaA PE=3 SV=1					Manganese ABC transporter substrate-binding lipoprotein OS=Streptococcus pneumoniae (strain ATCC BAA-255 / R6) GN=psaA PE=3 SV=1	37	2	103099
Q8DQX8	1	1	33.16	0.428694	0.591283	3.58841	0.126525	0.428694	0.51139	3.58841	0.126525	Outcome 1	Outcome 0	Phosphoglycerate kinase OS=Streptococcus pneumoniae (strain ATCC BAA-255 / R6) GN=pgk PE=1 SV=1					Phosphoglycerate kinase OS=Streptococcus pneumoniae (strain ATCC BAA-255 / R6) GN=pgk PE=1 SV=1	38	1	12988.6
Q8DQ84	1	1	51.88	0.00800492	0.197689	9.13044	0.792823	0.00800492	0.172191	9.13044	0.792823	Outcome 1	Outcome 0	Pyruvate kinase OS=Streptococcus pneumoniae (strain ATCC BAA-255 / R6) GN=pykF PE=3 SV=1					Pyruvate kinase OS=Streptococcus pneumoniae (strain ATCC BAA-255 / R6) GN=pykF PE=3 SV=1	39	1	2959.85
Q8DQJ4	5	5	259.77	0.340246	0.55347	1.60135	0.162563	0.249252	0.42597	1.73908	0.216542	Outcome 1	Outcome 0	Pyruvate oxidase OS=Streptococcus pneumoniae (strain ATCC BAA-255 / R6) GN=spxB PE=3 SV=1					Pyruvate oxidase OS=Streptococcus pneumoniae (strain ATCC BAA-255 / R6) GN=spxB PE=3 SV=1	12	2	159812
Q8DRI0	1	1	35.32	0.704236	0.674992	22.6851	0.0670851	0.704236	0.57997	22.6851	0.0670851	Outcome 1	Outcome 0	Surface protein pspA OS=Streptococcus pneumoniae (strain ATCC BAA-255 / R6) GN=pspA PE=4 SV=1	virulence				Surface protein pspA OS=Streptococcus pneumoniae (strain ATCC BAA-255 / R6) GN=pspA PE=4 SV=1	40	1	0
Q8CZ23	1	1	36.43	0.0765767	0.344342	24.2616	0.443994	0.0765767	0.272888	24.2616	0.443994	Outcome 1	Outcome 0	Uncharacterized protein OS=Streptococcus pneumoniae (strain ATCC BAA-255 / R6) GN=spr0563 PE=4 SV=1					Uncharacterized protein OS=Streptococcus pneumoniae (strain ATCC BAA-255 / R6) GN=spr0563 PE=4 SV=1	41	1	2539.83
Q8DMY4	1	1	69.87	0.256968	0.511927	5.7049	0.211036	0.256968	0.42597	5.7049	0.211036	Outcome 1	Outcome 0	General stress protein GSP-781 OS=Streptococcus pneumoniae (strain ATCC BAA-255 / R6) GN=gsp-781 PE=4 SV=1					General stress protein GSP-781 OS=Streptococcus pneumoniae (strain ATCC BAA-255 / R6) GN=gsp-781 PE=4 SV=1	42	1	2231.79
Q8DPG0	1	1	29.12	0.911922	0.752513	1.87747	0.0514359	0.911922	0.64355	1.87747	0.0514359	Outcome 1	Outcome 0	Glutamate dehydrogenase OS=Streptococcus pneumoniae (strain ATCC BAA-255 / R6) GN=gdhA PE=3 SV=1					Glutamate dehydrogenase OS=Streptococcus pneumoniae (strain ATCC BAA-255 / R6) GN=gdhA PE=3 SV=1	43	2	47761.8
Q8CWN6	6	6	441.2	0.00115201	0.0917718	8.988	0.933597	0.00262882	0.115862	8.90154	0.888914	Outcome 1	Outcome 0	Glyceraldehyde-3-phosphate dehydrogenase OS=Streptococcus pneumoniae (strain ATCC BAA-255 / R6) GN=gapA PE=3 SV=1					Glyceraldehyde-3-phosphate dehydrogenase OS=Streptococcus pneumoniae (strain ATCC BAA-255 / R6) GN=gapA PE=3 SV=1	44	2	109116
Q8DPT3	1	1	24.06	0.044339	0.344342	2.37692	0.545634	0.044339	0.269408	2.37692	0.545634	Outcome 1	Outcome 0	Histone-like DNA-binding protein OS=Streptococcus pneumoniae (strain ATCC BAA-255 / R6) GN=hlpA PE=3 SV=1					Histone-like DNA-binding protein OS=Streptococcus pneumoniae (strain ATCC BAA-255 / R6) GN=hlpA PE=3 SV=1	45	2	108075
Q8DR03	1	1	44.44	0.491308	0.606267	1.01916	0.107388	0.491308	0.529909	1.01916	0.107388	Outcome 1	Outcome 0	Ketol-acid reductoisomerase OS=Streptococcus pneumoniae (strain ATCC BAA-255 / R6) GN=ilvC PE=3 SV=1					Ketol-acid reductoisomerase OS=Streptococcus pneumoniae (strain ATCC BAA-255 / R6) GN=ilvC PE=3 SV=1	46	2	136271
P0A3N0	1	1	79.22	0.687899	0.674625	5.93646	0.0691565	0.687899	0.577518	5.93646	0.0691565	Outcome 1	Outcome 0	L-lactate dehydrogenase OS=Streptococcus pneumoniae (strain ATCC BAA-255 / R6) GN=ldh PE=1 SV=2					L-lactate dehydrogenase OS=Streptococcus pneumoniae (strain ATCC BAA-255 / R6) GN=ldh PE=1 SV=2	47	1	0
Q8DNP9	3	3	158.03	0.313347	0.551565	2.3352	0.17632	0.313347	0.447536	2.3352	0.17632	Outcome 1	Outcome 0	Thioredoxin OS=Streptococcus pneumoniae (strain ATCC BAA-255 / R6) GN=trxA PE=3 SV=1					Thioredoxin OS=Streptococcus pneumoniae (strain ATCC BAA-255 / R6) GN=trxA PE=3 SV=1	48	2	44591.4
